# Supplementary material for: Cooperative catalysis of carbenes and Lewis acids for the highly enantioselective synthesis of dihydroquinolones via in situ generation of aza-ortho-quinone methide and enolate intermediates
Source: Royal Society of Chemistry journal article supplement (doi:10.1039/d3qo02005c), 2024-01-01
Supplement: d3qo02005c1.pdf [file d3qo02005c1.pdf]

## Supporting Information

### Cooperative Catalysis of Carbenes and Lewis Acids for the Highly Enantioselective Synthesis of Dihydroquinolones via In Situ Generation of Aza-Ortho-Quinone Methides and Enolates Intermediates

Zhiying Li, Zhenhong Wu, Huan Gong, Xinyi Xu, Jianfeng Xu\* and Xingkuan Chen\*

*Guangdong Provincial Key Laboratory of Functional Supramolecular Coordination Materials and Applications, Department of Chemistry, Jinan University, Guangzhou, Guangdong 510632, P. R. Key Laboratory of Surface & Interface Science of Polymer Materials of Zhejiang Province, School of Chemistry and Chemical Engineering, Zhejiang Sci-Tech University, Hangzhou 310018, P. R. China*

Email: [jfxu@zstu.edu.cn](mailto:jfxu@zstu.edu.cn); [xkchen@jnu.edu.cn](mailto:xkchen@jnu.edu.cn)

## Table of Contents

|     |                                                                    |     |
|-----|--------------------------------------------------------------------|-----|
| I   | General information                                                | S1  |
| II  | Preparation of substrates                                          | S2  |
| III | General procedure for the catalytic synthesis of products <b>3</b> | S3  |
| IV  | Procedure for synthetic transformations of the product <b>3a</b>   | S3  |
| V   | Stereochemistry determination by X-ray crystallographic analysis   | S4  |
| VI  | Characterizations of products                                      | S5  |
| VII | <sup>1</sup> H, <sup>13</sup> C NMR and HPLC spectra               | S14 |

### I. General information:

Commercially available materials purchased from reagent company were used as received, except aldehydes that were purified *via* distillation or column chromatography prior to use. Proton nuclear magnetic resonance (<sup>1</sup>H NMR) spectra were recorded on a Bruker (300 MHz) spectrometer. Chemical shifts were recorded in parts per million (ppm,  $\delta$ ) relative to chloroform ( $\delta$  = 7.26, singlet). <sup>1</sup>H NMR splitting patterns are designated as singlet (s), doublet (d), triplet (t), quartet (q), dd (doublet of doublets), m (multiplets), and etc. All first-order splitting patterns were assigned on the basis of the appearance of the multiplet. Splitting patterns that could not be easily interpreted are designated as multiplet (m) or broad (br). Carbon nuclear magnetic resonance (<sup>13</sup>C NMR) spectra were recorded on a Bruker (300 MHz) (75 MHz) spectrometer. High resolution mass spectrometry (HRMS) analysis was performed

using electrospray ionization (ESI) with a quadrupole-time of flight (QTOF) mass analyzer. The determination of *ee* was performed *via* chiral HPLC analysis using Agilent G7129A HPLC workstation. X-ray crystallography analysis was performed on XtaLAB PRO X-ray diffraction meter. Optical rotations were measured using a 10 mL cell with a 10 cm path length on a Shanghai Shenguang WZZ-2A polarimeter and are reported as follows:  $[\alpha]_D^{25}$  (*c* in g per 100 mL solvent). Analytical thin-layer chromatography (TLC) was carried out on GF254 pre-coated silica gel plate (0.2 mm thickness). Visualization was performed using a UV lamp.

## II. Preparation of substrates

2-(Tosylmethyl)anilines **1** and  $\alpha$ -Chloro aldehyde **2** were prepared according to the reported procedure. A typical procedure for the synthesis of starting material is shown below.

A typical method for synthesis of substrates 2-(Tosylmethyl)anilines **1**<sup>1</sup>:

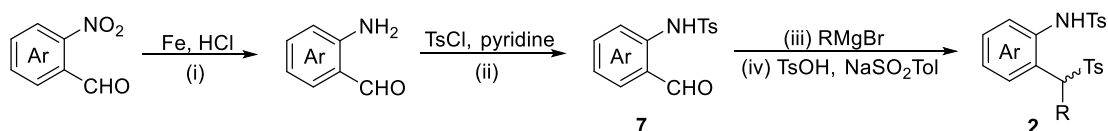

(iii) Under N<sub>2</sub> condition, a solution of Grignard reagent (2.5 equiv.) was slowly added to aldehyde **7** (9.0 mmol) in dry THF (10 mL). After being stirred at room temperature for 3 h, the reaction mixture was quenched by saturated NH<sub>4</sub>Cl (20 mL) and extracted with DCM. The combined extracts were washed with brine, then dried over Na<sub>2</sub>SO<sub>4</sub>, filtered and concentrated. The resulting crude solid was used in next step without purification.

(iv) TolSO<sub>2</sub>Na (1.25 equiv.) and TsOH (1.75 equiv.) were placed in a dried Schlenk tube, and dry DCM (20 mL) was added. The resulting mixture was stirred at room temperature for 5 min. Then, the solution (15 mL) of the crude product diaryl methanols in DCM was added and stirred for 1.5 h. The reaction mixture was quenched and adjusted to pH = 8 by a saturated NaHCO<sub>3</sub>. After extracted with DCM, the combined extracts were washed with 1 M HCl and brine, then dried over Na<sub>2</sub>SO<sub>4</sub>, filtered and concentrated. The resulting crude solid was purified on silica gel column chromatography (eluent: 3/1 (v/v) ethyl acetate/petroleum ether) to afford the desired product as a white or brown solid (67%-84% yield).

Typical method for synthesis of  $\alpha$ -Chloro aldehyde **2a**<sup>2</sup>:

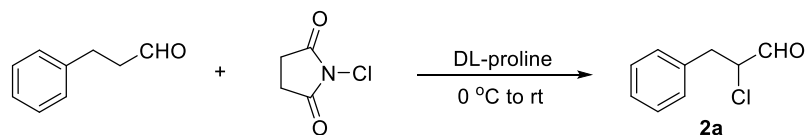

To a stirred solution of 3-Phenylpropionaldehyde (1.34 g, 10 mmol) in CH<sub>2</sub>Cl<sub>2</sub> (40 mL) was added DL-proline (230 mg, 2 mmol) and NCS (1.33 g, 10 mmol) at 0 °C. The reaction mixture was stirred at 0 °C for 1 h, and then allowed to reach rt and stirred for additional 1.5 h. The reaction mixture was quenched by addition of pentane (50 mL), filtered through a short plug of celite, the organic phase was concentrated under reduced pressure and the residue was subjected to column chromatography directly using hexane/ether (4:1) as eluent to afford the desired product **2a** as a colorless oil (1.09 g, 65% yield).

### III. General procedure for the catalytic synthesis of products **3**

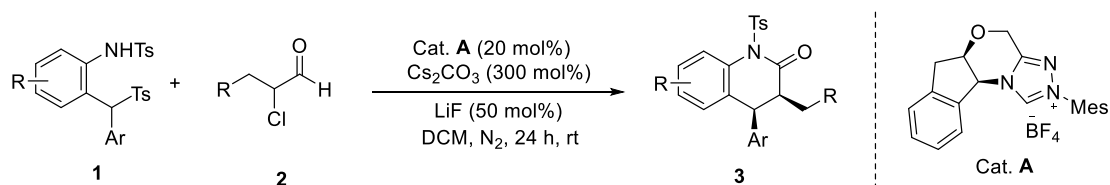

To a dry schlenk reaction tube equipped with a magnetic stir bar, was added N-(6-((4-methoxyphenyl)(tosyl)methyl)benzo[d][1,3]dioxol-5-yl)-4-methylbenzenesulfonamide **1a** (56.5 mg, 0.1 mmol),  $\alpha$ -Chloro aldehyde **2a** (33.6 mg, 0.2 mmol), NHC Cat. **A** (8.4 mg, 0.02 mmol),  $\text{Cs}_2\text{CO}_3$  (97.5 mg, 0.3 mmol) and LiF (1.3 mg, 0.05 mmol). The schlenk tube was then evacuated and refilled with dry  $\text{N}_2$ . Anhydrous DCM (1 mL) was added. The mixture was stirred at rt for 24 h. Solvent was removed under reduced pressure, and the residue was purified via column chromatography on silica gel with hexane/EtOAc (typically 10:1) as eluent to afford the products **3a** (47 mg, 84% yield).

### IV: Procedure for the synthetic transformations of the product **3a**

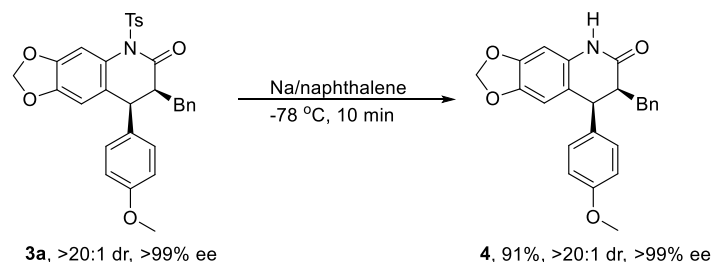

To a solution **3a** (108.2 mg, 0.20 mmol, 1.0 equiv) in 2 mL of THF was added 0.4 mL Na/naphthalene THF solution (the Na/naphthalene solution was prepared with 5 mmol Na, 5 mmol naphthalene in 3 mL THF), and the reaction was stirred at  $-78^\circ\text{C}$  for 10 minutes. Then  $\text{H}_2\text{O}$  (2 mL) was added to quench the reaction and the resulting mixture was extracted with  $\text{CH}_2\text{Cl}_2$  (1 mL X 2). The combined organic layer was dried over  $\text{Na}_2\text{SO}_4$ , filtered and concentrated to dryness under reduced pressure at  $40^\circ\text{C}$ . The residue was purified through column chromatography on silica gel (petroleum ether/ethyl acetate = 8:1 to 3:1) to afford the desired product **4** as a white solid in 91% yield (70.4 mg).

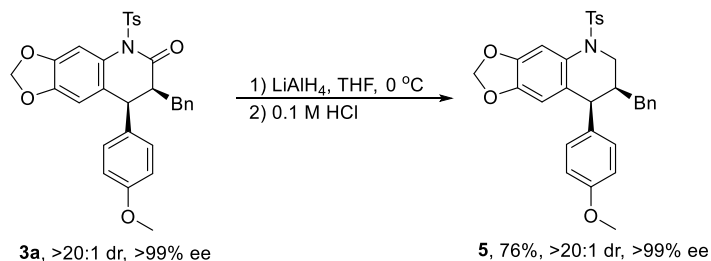

To a stirred solution of **3a** (108.2 mg, 0.20 mmol, 1.0 equiv) in THF (1.0 mL) at  $0^\circ\text{C}$ , under  $\text{N}_2$  atmosphere, was dropwise added  $\text{LiAlH}_4$  (22.8 mg, 0.6 mmol, 3.0 equiv) in dry THF (1 mL). The reaction was stirred at  $0^\circ\text{C}$  for 2 h. Then the solution was quenched with an 0.1 M HCl solution. The aqueous phase was extracted three times with EtOAc. The combined organic phases were dried over  $\text{Na}_2\text{SO}_4$ , filtered, and concentrated under reduced pressure. The residue was

purified through column chromatography on silica gel (petroleum ether/ethyl acetate = 6:1) to afford **5** (80.1 mg, 76%).

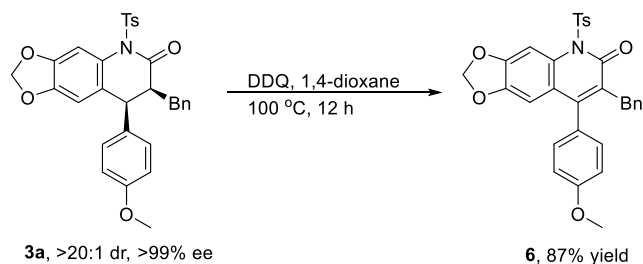

To a solution of **3a** (54.1 mg, 0.10 mmol, 1.0 equiv) in 1 mL of 1,4-dioxane was added DDQ (45.4 mg, 0.20 mmol, 2.0 equiv), and the reaction mixture was stirred at 100 °C for 12 h. Then H<sub>2</sub>O (2 mL) was added and the resulting mixture was extracted with ethyl acetate (2 mL x 2). The combined organic layer was dried over Na<sub>2</sub>SO<sub>4</sub>, filtered and concentrated to dryness under reduced pressure at 40 °C. The residue was purified through column chromatography on silica gel (petroleum ether/ethyl acetate = 10:1 to 5:1) to afford the desired product **6** as a white solid in 87% yield (46.8 mg).

## V: Stereochemistry determination via X-ray crystallographic analysis:

Good quality crystal of **3a** (colorless needle crystal) was obtained by vaporization of a hexane/ethyl acetate solution of compound **3a**. CCDC 2291789 contains the supplementary crystallographic data for this paper. These data can be obtained free of charge from The Cambridge Crystallographic Data Centre via [www.ccdc.cam.ac.uk/data\\_request/cif](http://www.ccdc.cam.ac.uk/data_request/cif).

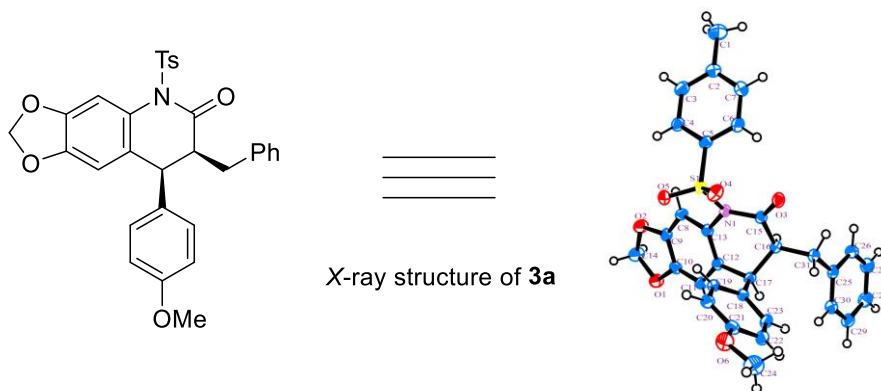

## References cited in the SI:

- [1] X. Liu, K. Wang, W. Guo, Y. Liu and C. Li, An organic-base catalyzed asymmetric 1,4-addition of tritylthiol to in situ generated aza-o-quinone methides at the H<sub>2</sub>O/DCM interface, *Chem. Commun.*, 2019, **55**, 2668-2671.
- [2] (a) T. Borg, J. Danielsson, M. Mohiti, P. Restorp and P. Somfai, Diastereoselective Nucleophilic Addition to Aldehydes with Polar  $\alpha$ - and  $\alpha,\beta$ -Substituents, *Adv. Synth. Catal.*, 2011, **353**, 2022-2036; (b) Y. Jing, C. G. Daniliuc and A. Studer, Direct Conversion of Alcohols to  $\alpha$ -Chloro Aldehydes and  $\alpha$ -Chloro Ketones, *Org. Lett.*, 2014, **16**, 4932-4935.

## VI. Characterization of Products:

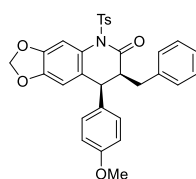

**(7R,8S)-7-benzyl-8-(4-methoxyphenyl)-5-tosyl-7,8-dihydro-[1,3]dioxolo[4,5-g]quinolin-6(5H)-one (3a):** Yield: 46 mg (87%), white solid, mp: 114-116 °C;  $^1\text{H}$  NMR (300 MHz, Chloroform-*d*)  $\delta$  8.02 (d,  $J$  = 8.4 Hz, 2H), 7.42 (s, 1H), 7.37 (d,  $J$  = 8.1 Hz, 2H), 7.28 (d,  $J$  = 6.6 Hz, 1H), 7.26 – 7.16 (m, 2H), 7.04 (d,  $J$  = 6.3 Hz, 2H), 6.87 (d,  $J$  = 8.7 Hz, 2H), 6.69 (d,  $J$  = 8.7 Hz, 2H), 6.59 (s, 1H), 5.95 (d,  $J$  = 4.7 Hz, 2H), 3.77 (s, 3H), 3.73 (d,  $J$  = 5.7 Hz, 1H), 3.35 (dd,  $J$  = 14.7, 4.2 Hz, 1H), 3.24 – 2.99 (m, 1H), 2.49 (s, 4H);  $^{13}\text{C}$  NMR (75 MHz, Chloroform-*d*)  $\delta$  171.88, 158.72, 146.58, 145.49, 145.11, 138.80, 136.36, 129.45, 129.42, 129.35, 129.07, 128.93, 128.63, 128.54, 127.36, 126.50, 114.15, 107.81, 105.05, 101.74, 55.20, 49.44, 44.34, 32.35, 21.77; HRMS (ESI,  $m/z$ ): calcd. for  $\text{C}_{31}\text{H}_{27}\text{NO}_6\text{S}[\text{M}+\text{H}]^+$  542.1632, found 542.1631;  $[\alpha]_D^{25} = +117.7$  ( $c$  = 1.3,  $\text{CH}_2\text{Cl}_2$ ); HPLC analysis: 99% ee (Chiralcel IB N-5, 20:80  $^i\text{PrOH}$ /Hexane, 0.5 mL/min),  $R_t$  (minor) = 28.4 min,  $R_t$  (major) = 26.6 min.

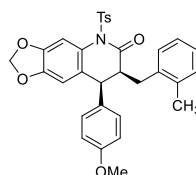

**(7R,8S)-8-(4-methoxyphenyl)-7-(2-methylbenzyl)-5-tosyl-7,8-dihydro-[1,3]dioxolo[4,5-g]quinolin-6(5H)-one (3b):** Yield: 49 mg (89%), white solid, mp: 124-126 °C;  $^1\text{H}$  NMR (300 MHz, Chloroform-*d*)  $\delta$  8.02 (d,  $J$  = 8.1 Hz, 2H), 7.43 – 7.33 (m, 3H), 7.17 – 7.04 (m, 3H), 6.89 (dd,  $J$  = 16.6, 7.6 Hz, 3H), 6.69 (d,  $J$  = 8.5 Hz, 2H), 6.64 (s, 1H), 5.95 (d,  $J$  = 6.9 Hz, 2H), 3.78 (s, 4H), 3.33 (dd,  $J$  = 14.9, 4.1 Hz, 1H), 3.13 (dt,  $J$  = 10.0, 5.0 Hz, 1H), 2.61 (dd,  $J$  = 15.0, 10.0 Hz, 1H), 2.50 (s, 3H), 2.10 (s, 3H);  $^{13}\text{C}$  NMR (75 MHz, Chloroform-*d*)  $\delta$  172.09, 158.68, 146.56, 145.52, 145.12, 136.81, 136.55, 136.32, 130.65, 129.50, 129.44, 129.31, 129.18, 129.05, 128.38, 127.40, 126.58, 125.99, 114.24, 107.74, 105.14, 101.77, 55.22, 47.64, 44.36, 29.42, 21.79, 19.50; HRMS (ESI,  $m/z$ ): calcd. for  $\text{C}_{32}\text{H}_{29}\text{NO}_6\text{S}[\text{M}+\text{H}]^+$  556.1789, found 556.1786;  $[\alpha]_D^{25} = +225.3$  ( $c$  = 0.3,  $\text{CH}_2\text{Cl}_2$ ); HPLC analysis: 99% ee (Chiralcel IB N-5, 20:80  $^i\text{PrOH}$ /Hexane, 0.5 mL/min),  $R_t$  (minor) = 23.9 min,  $R_t$  (major) = 21.0 min.

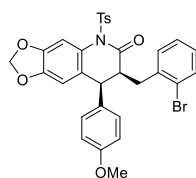

**(7S,8S)-7-(2-bromobenzyl)-8-(4-methoxyphenyl)-5-tosyl-7,8-dihydro-[1,3]dioxolo[4,5-g]quinolin-6(5H)-one (3c):** Yield: 53 mg (86%), white solid, mp: 117-119 °C;  $^1\text{H}$  NMR (300 MHz, Chloroform-*d*)  $\delta$  7.99 (d,  $J$  = 8.4 Hz, 2H), 7.48 (dd,  $J$  = 7.8, 1.4 Hz, 1H), 7.41 – 7.31 (m, 3H), 7.19 – 7.11 (m, 1H), 7.05 (ddd,  $J$  = 10.2, 8.2, 2.0 Hz, 2H), 6.98 – 6.85 (m, 2H), 6.75 – 6.61 (m, 3H), 6.02 – 5.89 (m, 2H), 3.80 (d,  $J$  = 5.6 Hz, 1H), 3.77 (s, 3H), 3.35 (dd,  $J$  = 13.8, 5.8 Hz, 1H), 3.26 (dt,  $J$  = 7.4, 5.7 Hz, 1H), 2.76 (dd,  $J$  = 13.9, 7.3 Hz, 1H), 2.48 (s, 3H);  $^{13}\text{C}$  NMR (75 MHz, Chloroform-*d*)  $\delta$  171.64, 158.71,

146.56, 145.53, 145.03, 138.35, 136.29, 132.90, 132.05, 129.45, 129.40, 129.29, 129.15, 128.40, 128.30, 127.32, 124.61, 114.24, 107.67, 105.24, 101.75, 55.21, 47.38, 45.46, 33.77, 21.76; HRMS (ESI,  $m/z$ ): calcd. for  $C_{31}H_{26}BrNO_6S[M+Na]^+$  642.0557, found 642.0542;  $[\alpha]^{25}_D = +187.3$  ( $c = 0.4$ ,  $CH_2Cl_2$ ); HPLC analysis: 99% ee (Chiralcel IB N-5, 20:80  $i$ PrOH/Hexane, 0.5 mL/min),  $R_t$  (minor) = 25.3 min,  $R_t$  (major) = 23.1 min.

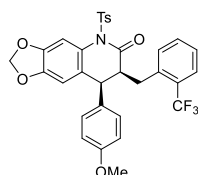

**(7S,8S)-8-(4-methoxyphenyl)-5-tosyl-7-(2-(trifluoromethyl)benzyl)-7,8-dihydro-[1,3]dioxolo[4,5-g]quinolin-6(5H)-one (3d)**: Yield: 55 mg (91%), white solid, mp: 121-123 °C;  $^1H$  NMR (300 MHz, Chloroform- $d$ )  $\delta$  7.96 (d,  $J = 8.1$  Hz, 2H), 7.59 (d,  $J = 7.7$  Hz, 1H), 7.54 – 7.21 (m, 6H), 6.91 (d,  $J = 8.4$  Hz, 2H), 6.67 (d,  $J = 6.6$  Hz, 3H), 5.94 (d,  $J = 3.8$  Hz, 2H), 3.89 (d,  $J = 5.5$  Hz, 1H), 3.76 (s, 3H), 3.47 (dd,  $J = 14.8, 5.9$  Hz, 1H), 3.09 (q,  $J = 6.1$  Hz, 1H), 2.87 (dd,  $J = 14.8, 6.8$  Hz, 1H), 2.47 (s, 3H);  $^{13}C$  NMR (75 MHz, Chloroform- $d$ )  $\delta$  171.61, 158.73, 146.62, 145.62, 145.08, 137.85, 136.20, 132.16, 131.84, 129.46, 129.40, 129.12, 129.03, 128.42, 127.38, 126.74, 126.37, 114.26, 107.59, 105.35, 101.80, 55.19, 49.02, 45.58, 29.98, 21.74; HRMS (ESI,  $m/z$ ): calcd. for  $C_{35}H_{29}F_3NO_6S[M+H]^+$ , found 556.1786;  $[\alpha]^{25}_D = +211.5$  ( $c = 0.4$ ,  $CH_2Cl_2$ ); HPLC analysis: 99% ee (Chiralcel IB N-5, 20:80  $i$ PrOH/Hexane, 0.5 mL/min),  $R_t$  (minor) = 20.5 min,  $R_t$  (major) = 18.1 min.

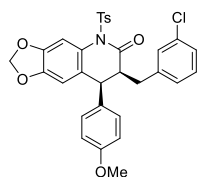

**(7S,8S)-7-(3-chlorobenzyl)-8-(4-methoxyphenyl)-5-tosyl-7,8-dihydro-[1,3]dioxolo[4,5-g]quinolin-6(5H)-one (3e)**: Yield: 50 mg (88%), white solid, mp: 132-134 °C;  $^1H$  NMR (300 MHz, Chloroform- $d$ )  $\delta$  8.02 (d,  $J = 8.1$  Hz, 2H), 7.43 (s, 1H), 7.37 (d,  $J = 8.1$  Hz, 2H), 7.18 (d,  $J = 4.7$  Hz, 2H), 7.03 (s, 1H), 6.96 – 6.85 (m, 3H), 6.71 (d, 2H), 6.60 (s, 1H), 5.93 (d,  $J = 5.9, 1.4$  Hz, 2H), 3.76 (s, 3H), 3.73 (d,  $J = 5.7$  Hz, 1H), 3.30 (dd,  $J = 14.6, 4.6$  Hz, 1H), 3.18 – 3.05 (m, 1H), 2.48 (s, 4H);  $^{13}C$  NMR (75 MHz, Chloroform- $d$ )  $\delta$  171.53, 158.84, 146.67, 145.58, 145.23, 141.04, 136.28, 134.31, 129.91, 129.47, 129.42, 129.29, 129.01, 128.91, 128.46, 127.24, 127.09, 126.76, 114.26, 107.84, 105.06, 101.83, 55.22, 49.28, 44.74, 32.38, 21.77; HRMS (ESI,  $m/z$ ): calcd. for  $C_{31}H_{26}ClNO_6S[M+Na]^+$  598.1062, found 598.1068;  $[\alpha]^{25}_D = +174.5$  ( $c = 0.4$ ,  $CH_2Cl_2$ ); HPLC analysis: 99% ee (Chiralcel IB N-5, 20:80  $i$ PrOH/Hexane, 0.5 mL/min),  $R_t$  (minor) = 29.7 min,  $R_t$  (major) = 26.4 min.

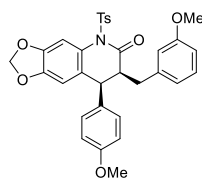

**(7R,8S)-7-(3-methoxybenzyl)-8-(4-methoxyphenyl)-5-tosyl-7,8-dihydro-[1,3]dioxolo[4,5-g]quinolin-6-one (3f):** Yield: 53 mg (93%), white solid, mp: 138-140 °C;  $^1\text{H}$  NMR (300 MHz, Chloroform-*d*)  $\delta$  8.01 (d,  $J$  = 8.0 Hz, 2H), 7.36 (d,  $J$  = 8.5 Hz, 3H), 7.28 (s, 1H), 6.95 (d,  $J$  = 8.5 Hz, 2H), 6.76 – 6.63 (m, 3H), 6.54 (s, 1H), 5.97 (d,  $J$  = 6.7 Hz, 2H), 3.77 (s, 4H), 3.70 (s, 3H), 3.33 – 3.18 (m, 2H), 2.73 (dt,  $J$  = 12.1, 5.7 Hz, 1H), 2.49 (s, 3H);  $^{13}\text{C}$  NMR (75 MHz, Chloroform-*d*)  $\delta$  171.72, 158.86, 153.38, 146.66, 145.62, 145.14, 136.36, 136.13, 130.28, 129.43, 129.31, 129.25, 129.14, 128.25, 127.05, 125.15, 121.30, 115.48, 114.30, 107.66, 105.12, 101.79, 56.22, 55.25, 46.97, 45.76, 31.95, 21.75; HRMS (ESI,  $m/z$ ): calcd. for  $\text{C}_{32}\text{H}_{29}\text{NO}_7\text{S}[\text{M}+\text{H}]^+$ , found 556.1786;  $[\alpha]_{\text{D}}^{25} = +154.5$  ( $c$  = 0.4,  $\text{CH}_2\text{Cl}_2$ ); HPLC analysis: 99% ee (Chiralcel IB N-5, 20:80  $i$ PrOH/Hexane, 0.5 mL/min),  $R_t$  (minor) = 39.6 min,  $R_t$  (major) = 29.4 min.

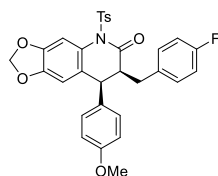

**(7S,8S)-7-(4-fluorobenzyl)-8-(4-methoxyphenyl)-5-tosyl-7,8-dihydro-[1,3]dioxolo[4,5-g]quinolin-6-one (3g):** Yield: 49 mg (88%), white solid, mp: 148-150 °C;  $^1\text{H}$  NMR (300 MHz, Chloroform-*d*)  $\delta$  8.01 (d,  $J$  = 8.4 Hz, 2H), 7.41 (s, 1H), 7.36 (d,  $J$  = 8.2 Hz, 2H), 7.00 – 6.90 (m, 4H), 6.86 (d,  $J$  = 8.7 Hz, 2H), 6.72 – 6.64 (m, 2H), 6.60 (s, 1H), 6.00 – 5.91 (m, 2H), 3.77 (s, 3H), 3.70 (d,  $J$  = 5.8 Hz, 1H), 3.28 (dd,  $J$  = 14.6, 4.6 Hz, 1H), 3.14 – 3.01 (m, 1H), 2.49 (s, 4H);  $^{13}\text{C}$  NMR (100 MHz, Chloroform-*d*)  $\delta$  171.72, 161.55 (d,  $J$  = 242.9 Hz), 158.76, 146.62, 145.54, 145.16, 136.30, 134.35 (d,  $J$  = 3.3 Hz), 130.34 (d,  $J$  = 7.8 Hz), 129.43, 129.25, 129.07, 128.96, 128.47, 127.19, 115.41 (d,  $J$  = 21.0 Hz), 114.20, 107.77, 105.06, 101.77, 55.21, 49.52, 44.52, 31.75, 21.77; HRMS (ESI,  $m/z$ ): calcd. for  $\text{C}_{31}\text{H}_{26}\text{FNO}_6\text{S}[\text{M}+\text{Na}]^+$  582.1358, found 582.1348;  $[\alpha]_{\text{D}}^{25} = +203.1$  ( $c$  = 0.4,  $\text{CH}_2\text{Cl}_2$ ); HPLC analysis: 99% ee (Chiralcel IB N-5, 20:80  $i$ PrOH/Hexane, 0.5 mL/min),  $R_t$  (minor) = 32.9 min,  $R_t$  (major) = 26.5 min.

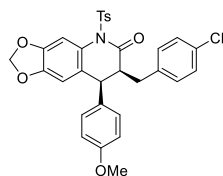

**(7S,8S)-7-(4-chlorobenzyl)-8-(4-methoxyphenyl)-5-tosyl-7,8-dihydro-[1,3]dioxolo[4,5-g]quinolin-6-one (3h):** Yield: 52 mg (90%), white solid, mp: 143-145 °C;  $^1\text{H}$  NMR (300 MHz, Chloroform-*d*)  $\delta$  8.01 (d,  $J$  = 8.4 Hz, 2H), 7.44 – 7.31 (m, 3H), 7.25 – 7.18 (m, 2H), 6.95 (d,  $J$  = 8.4 Hz, 2H), 6.89 – 6.81 (m, 2H), 6.73 – 6.63 (m, 2H), 6.60 (s, 1H), 5.96 (dd,  $J$  = 6.2, 1.4 Hz, 2H), 3.77 (s, 3H), 3.69 (d,  $J$  = 5.8 Hz, 1H), 3.27 (dd,  $J$  = 14.6, 4.6 Hz, 1H), 3.14 – 3.02 (m, 1H), 2.49 (s, 4H);  $^{13}\text{C}$  NMR (75 MHz, Chloroform-*d*)  $\delta$  171.60, 158.79, 146.64, 145.16, 137.28, 136.30, 132.26, 130.28, 129.42, 129.25,

128.88, 128.72, 128.45, 127.11, 114.21, 107.77, 105.05, 101.78, 55.21, 49.34, 44.57, 31.96, 21.77; HRMS (ESI, m/z): calcd. for  $C_{31}H_{26}ClNO_6S[M+Na]^+$  598.1062, found 598.1048;  $[\alpha]^{25}_D = +190.6$  ( $c = 0.4$ ,  $CH_2Cl_2$ ); HPLC analysis: 99% ee (Chiralcel IB N-5, 20:80  $i$ PrOH/Hexane, 0.5 mL/min),  $R_t$  (minor) = 41.8 min,  $R_t$  (major) = 33.7 min.

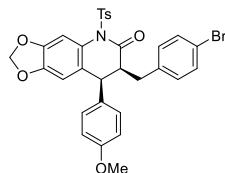

**(7S,8S)-7-(4-bromobenzyl)-8-(4-methoxyphenyl)-5-tosyl-7,8-dihydro-[1,3]dioxolo[4,5-g]quinolin-6-one (3i)**: Yield: 49 mg (79%), white solid, mp: 152-154 °C;  $^1H$  NMR (300 MHz, Chloroform- $d$ )  $\delta$  8.01 (d,  $J = 8.4$  Hz, 2H), 7.44 – 7.31 (m, 5H), 6.94 – 6.81 (m, 4H), 6.75 – 6.64 (m, 2H), 6.60 (s, 1H), 6.00 – 5.91 (m, 2H), 3.76 (s, 3H), 3.70 (d,  $J = 5.7$  Hz, 1H), 3.25 (dd,  $J = 14.6, 4.6$  Hz, 1H), 3.14 – 3.02 (m, 1H), 2.48 (s, 4H);  $^{13}C$  NMR (75 MHz, Chloroform- $d$ )  $\delta$  171.59, 158.80, 146.65, 145.57, 145.20, 137.85, 136.28, 131.68, 130.71, 129.45, 129.42, 129.27, 128.88, 128.46, 127.11, 120.31, 114.22, 107.80, 105.05, 101.80, 55.21, 49.27, 44.61, 32.08, 21.78; HRMS (ESI, m/z): calcd. for  $C_{31}H_{26}BrNO_6S[M+Na]^+$  642.0557, found 642.0541;  $[\alpha]^{25}_D = +156.7$  ( $c = 0.4$ ,  $CH_2Cl_2$ ); HPLC analysis: 99% ee (Chiralcel IB N-5, 20:80  $i$ PrOH/Hexane, 0.5 mL/min),  $R_t$  (minor) = 45.8 min,  $R_t$  (major) = 34.2 min.

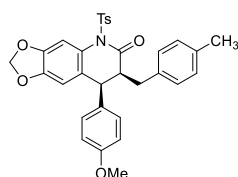

**(7R,8S)-8-(4-methoxyphenyl)-7-(4-methylbenzyl)-5-tosyl-7,8-dihydro-[1,3]dioxolo[4,5-g]quinolin-6-one (3j)**: Yield: 46 mg (85%), white solid, mp: 134-136 °C;  $^1H$  NMR (300 MHz, Chloroform- $d$ )  $\delta$  8.02 (d,  $J = 8.4$  Hz, 2H), 7.42 (s, 1H), 7.37 (d,  $J = 8.2$  Hz, 2H), 7.07 (d,  $J = 7.8$  Hz, 2H), 6.97 – 6.83 (m, 4H), 6.69 (d,  $J = 8.7$  Hz, 2H), 6.59 (s, 1H), 5.99 – 5.91 (m, 2H), 3.77 (s, 4H), 3.31 (dd,  $J = 14.7, 4.2$  Hz, 1H), 3.17 – 3.05 (m, 1H), 2.54 – 2.39 (m, 4H), 2.32 (s, 3H);  $^{13}C$  NMR (75 MHz, Chloroform- $d$ )  $\delta$  171.95, 158.70, 146.55, 145.47, 145.08, 136.40, 136.02, 135.61, 129.44, 129.40, 129.37, 129.31, 129.12, 128.79, 128.57, 127.44, 114.12, 107.82, 105.04, 101.73, 55.20, 49.51, 44.22, 31.85, 21.76, 21.05; HRMS (ESI, m/z): calcd. for  $C_{32}H_{29}NO_6S[M+Na]^+$  578.1608, found 578.1594;  $[\alpha]^{25}_D = +211.7$  ( $c = 0.3$ ,  $CH_2Cl_2$ ); HPLC analysis: 99% ee (Chiralcel IB N-5, 20:80  $i$ PrOH/Hexane, 0.5 mL/min),  $R_t$  (minor) = 26.8 min,  $R_t$  (major) = 25.1 min.

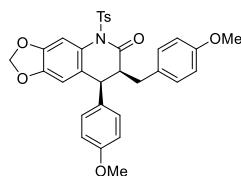

**(7S,8S)-7-(4-methoxybenzyl)-8-(4-methoxyphenyl)-5-tosyl-7,8-dihydro-[1,3]dioxolo[4,5-g]quinolin-6-one (3k)**: Yield: 50 mg (89%), white solid, mp: 165-167 °C;  $^1H$  NMR (300 MHz, Chloroform- $d$ )

$\delta$  8.02 (d,  $J$  = 8.4 Hz, 2H), 7.42 (s, 1H), 7.36 (d,  $J$  = 8.2 Hz, 2H), 6.97 – 6.85 (m, 4H), 6.80 (d,  $J$  = 8.6 Hz, 2H), 6.68 (d,  $J$  = 8.7 Hz, 2H), 6.59 (s, 1H), 5.95 (d,  $J$  = 4.9 Hz, 2H), 3.77 (d,  $J$  = 4.0 Hz, 6H), 3.73 (d,  $J$  = 5.7 Hz, 1H), 3.28 (dd,  $J$  = 14.6, 4.3 Hz, 1H), 3.14 – 3.01 (m, 1H), 2.48 (s, 3H), 2.47 – 2.35 (m, 1H);  $^{13}\text{C}$  NMR (75 MHz, Chloroform- $d$ )  $\delta$  171.97, 158.70, 158.20, 146.55, 145.48, 145.09, 136.38, 130.62, 129.88, 129.43, 129.41, 129.34, 129.14, 128.54, 127.43, 114.13, 114.01, 107.81, 105.04, 101.74, 55.27, 55.20, 49.62, 44.26, 31.46, 21.77; HRMS (ESI,  $m/z$ ): calcd. for  $\text{C}_{37}\text{H}_{29}\text{NO}_7\text{S}[\text{M}+\text{Na}]^+$  594.1557, found 594.1546;  $[\alpha]_{\text{D}}^{25}$  = +126.3 ( $c$  = 0.4,  $\text{CH}_2\text{Cl}_2$ ); HPLC analysis: 99% ee (Chiralcel IA, 30:70  $i$ PrOH/Hexane, 0.5 mL/min),  $R_t$  (minor) = 55.4 min,  $R_t$  (major) = 31.7 min.

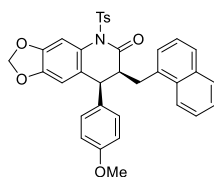

**(7S,8S)-8-(4-methoxyphenyl)-7-(naphthalen-1-ylmethyl)-5-tosyl-7,8-dihydro-[1,3]dioxolo[4,5-g]quinolin-6(5H)-one (3I):** Yield: 54 mg (92%), white solid, mp: 108-110 °C;  $^1\text{H}$  NMR (300 MHz, Chloroform- $d$ )  $\delta$  8.30 (d,  $J$  = 8.4 Hz, 1H), 8.04 (d,  $J$  = 8.1 Hz, 2H), 7.82 (d,  $J$  = 8.4 Hz, 1H), 7.67 – 7.30 (m, 7H), 6.93 (dd,  $J$  = 15.5, 8.0 Hz, 3H), 6.71 (d,  $J$  = 8.2 Hz, 2H), 6.54 (s, 1H), 5.90 (s, 2H), 3.89 (dd,  $J$  = 14.7, 3.7 Hz, 1H), 3.80 (s, 3H), 3.68 (d,  $J$  = 5.8 Hz, 1H), 3.28 – 3.16 (m, 1H), 2.92 (dd,  $J$  = 14.8, 9.8 Hz, 1H), 2.52 (s, 3H);  $^{13}\text{C}$  NMR (75 MHz, Chloroform- $d$ )  $\delta$  171.83, 158.77, 146.54, 145.48, 145.24, 136.21, 134.07, 132.66, 131.14, 131.07, 129.58, 129.47, 129.22, 129.17, 128.14, 127.26, 127.02, 126.83, 125.59, 125.44, 123.88, 114.37, 107.68, 105.05, 101.74, 55.25, 48.06, 44.67, 29.34, 21.81; HRMS (ESI,  $m/z$ ): calcd. for  $\text{C}_{35}\text{H}_{29}\text{NO}_6\text{S}[\text{M}+\text{H}]^+$  592.1789, found 592.1799;  $[\alpha]_{\text{D}}^{25}$  = +142.8 ( $c$  = 0.4,  $\text{CH}_2\text{Cl}_2$ ); HPLC analysis: 99% ee (Chiralcel IB N-5, 20:80  $i$ PrOH/Hexane, 0.5 mL/min),  $R_t$  (minor) = 35.2 min,  $R_t$  (major) = 29.5 min.

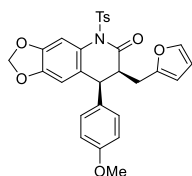

**(7S,8S)-7-(furan-2-ylmethyl)-8-(4-methoxyphenyl)-5-tosyl-7,8-dihydro-[1,3]dioxolo[4,5-g]quinolin-6(5H)-one (3m):** Yield: 38 mg (71%), white solid, mp: 237-239 °C;  $^1\text{H}$  NMR (300 MHz, Chloroform- $d$ )  $\delta$  8.03 (d,  $J$  = 8.4 Hz, 2H), 7.44 (s, 1H), 7.35 (d,  $J$  = 8.0 Hz, 2H), 7.31 (d,  $J$  = 1.9 Hz, 1H), 7.00 – 6.89 (m, 2H), 6.75 – 6.66 (m, 2H), 6.64 (s, 1H), 6.29 (dd,  $J$  = 3.2, 1.9 Hz, 1H), 6.05 – 5.92 (m, 3H), 3.87 (d,  $J$  = 5.3 Hz, 1H), 3.75 (s, 3H), 3.30 – 3.14 (m, 2H), 2.64 – 2.52 (m, 1H), 2.47 (s, 3H);  $^{13}\text{C}$  NMR (75 MHz, Chloroform- $d$ )  $\delta$  171.14, 158.83, 152.71, 146.70, 145.57, 145.11, 141.52, 136.45, 129.61, 129.42, 129.31, 128.85, 128.56, 127.07, 114.08, 110.33, 107.98, 107.07, 105.01, 101.77, 55.18, 47.45, 44.62, 25.15, 21.73; HRMS (ESI,  $m/z$ ): calcd. for  $\text{C}_{29}\text{H}_{25}\text{NO}_7\text{S}[\text{M}+\text{Na}]^+$  554.1244, found 554.1249;  $[\alpha]_{\text{D}}^{25}$  = +214.2 ( $c$  = 0.2,  $\text{CH}_2\text{Cl}_2$ ); HPLC analysis: 99% ee (Chiralcel IB N-5, 20:80  $i$ PrOH/Hexane, 0.5 mL/min),  $R_t$  (minor) = 27.2 min,  $R_t$  (major) = 24.3 min.

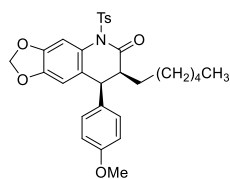

**(7S,8S)-7-hexyl-8-(4-methoxyphenyl)-5-tosyl-7,8-dihydro-[1,3]dioxolo[4,5-g]quinolin-6(5H)-one**

**(3n):** Yield: 34 mg (63%), white solid, mp: 159-161 °C; <sup>1</sup>H NMR (300 MHz, Chloroform-*d*) δ 7.96 (d, *J* = 8.4 Hz, 2H), 7.43 (s, 1H), 7.31 (d, *J* = 7.9 Hz, 2H), 6.97 – 6.83 (m, 2H), 6.70 (s, 1H), 6.69 – 6.60 (m, 2H), 6.04 – 5.83 (m, 2H), 3.93 (d, *J* = 5.5 Hz, 1H), 3.74 (s, 3H), 2.77 – 2.60 (m, 1H), 2.45 (s, 3H), 1.89 – 1.74 (m, 1H), 1.41 – 1.30 (m, 3H), 1.24 (m, 6H), 0.89 – 0.79 (m, 3H); <sup>13</sup>C NMR (75 MHz, Chloroform-*d*) δ 172.22, 158.66, 146.55, 145.50, 144.88, 136.52, 129.32, 129.29, 129.08, 128.89, 127.42, 114.00, 107.73, 105.21, 101.74, 55.17, 48.42, 45.21, 31.59, 29.18, 27.41, 26.67, 22.57, 21.71, 14.04; HRMS (ESI, *m/z*): calcd. for C<sub>30</sub>H<sub>33</sub>NO<sub>6</sub>S[M+Na]<sup>+</sup>, found 578.1594; [α]<sub>D</sub><sup>25</sup> = +189.5 (*c* = 0.2, CH<sub>2</sub>Cl<sub>2</sub>); HPLC analysis: 99% ee (Chiralcel IB N-5, 20:80 <sup>i</sup>PrOH/Hexane, 0.5 mL/min), R<sub>t</sub> (minor) = 26.0 min, R<sub>t</sub> (major) = 18.0 min.

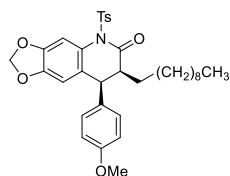

**(7S,8S)-7-decyl-8-(4-methoxyphenyl)-5-tosyl-7,8-dihydro-[1,3]dioxolo[4,5-g]quinolin-6(5H)-one**

**(3o):** Yield: 40 mg (68%), colorless oil; <sup>1</sup>H NMR (300 MHz, Chloroform-*d*) δ 7.96 (d, *J* = 8.4 Hz, 2H), 7.43 (s, 1H), 7.31 (d, *J* = 8.2 Hz, 2H), 6.95 – 6.81 (m, 2H), 6.74 – 6.60 (m, 3H), 6.02 – 5.93 (m, 2H), 3.93 (d, *J* = 5.6 Hz, 1H), 3.74 (s, 3H), 2.69 (q, *J* = 6.6, 5.9 Hz, 1H), 2.45 (s, 3H), 1.86 – 1.74 (m, 1H), 1.31 – 1.18 (m, 17H), 0.88 (d, *J* = 6.5 Hz, 3H); <sup>13</sup>C NMR (75 MHz, Chloroform-*d*) δ 172.22, 158.65, 146.55, 145.50, 144.87, 136.52, 129.32, 129.28, 129.07, 128.88, 127.42, 114.00, 107.73, 105.22, 101.73, 55.16, 48.42, 45.18, 31.90, 29.56, 29.50, 29.39, 29.31, 27.43, 26.64, 22.68, 21.71, 14.12; HRMS (ESI, *m/z*): calcd. for C<sub>34</sub>H<sub>41</sub>NO<sub>6</sub>S[M+Na]<sup>+</sup> 614.2547, found 614.2533; [α]<sub>D</sub><sup>25</sup> = +199.3 (*c* = 0.3, CH<sub>2</sub>Cl<sub>2</sub>); HPLC analysis: 99% ee (Chiralcel IB N-5, 20:80 <sup>i</sup>PrOH/Hexane, 0.5 mL/min), R<sub>t</sub> (minor) = 23.7 min, R<sub>t</sub> (major) = 16.1 min.

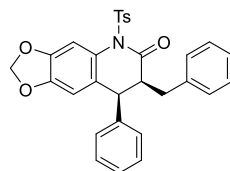

**(7S,8S)-7-benzyl-8-phenyl-5-tosyl-7,8-dihydro-[1,3]dioxolo[4,5-g]quinolin-6(5H)-one (3p):**

Yield: 43 mg (85%), white solid, mp: 137-139 °C; <sup>1</sup>H NMR (300 MHz, Chloroform-*d*) δ 8.01 (d, *J* = 8.4 Hz, 2H), 7.43 (s, 1H), 7.36 (d, *J* = 8.2 Hz, 2H), 7.29 (d, *J* = 2.2 Hz, 1H), 7.24 – 7.11 (m, 5H), 7.05 – 6.98 (m, 2H), 6.98 – 6.89 (m, 2H), 6.61 (s, 1H), 6.00 – 5.91 (m, 2H), 3.77 (d, *J* = 5.8 Hz, 1H), 3.36 (dd, *J* = 14.7, 4.2 Hz, 1H), 3.20 – 3.11 (m, 1H), 2.49 (s, 4H); <sup>13</sup>C NMR (75 MHz, Chloroform-*d*) δ 171.75, 146.66, 145.49, 145.14, 138.75, 137.12, 136.28, 129.52, 129.39, 129.07, 128.92, 128.79, 128.64, 128.23, 127.33, 126.94, 126.52, 107.88, 105.05, 101.76, 49.25, 45.05, 32.35, 21.77; HRMS (ESI, *m/z*):

calcd. for  $C_{30}H_{25}NO_5S[M+Na]^+$  534.1346, found 534.1334;  $[\alpha]^{25}_D = +242.3$  ( $c = 0.3$ ,  $CH_2Cl_2$ ); HPLC analysis: 99% ee (Chiralcel IB N-5, 20:80  $i$ PrOH/Hexane, 0.5 mL/min),  $R_t$  (minor) = 24.0 min,  $R_t$  (major) = 22.2 min.

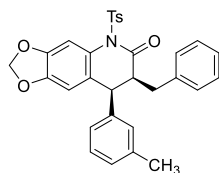

**(7S,8S)-7-benzyl-8-(m-tolyl)-5-tosyl-7,8-dihydro-[1,3]dioxolo[4,5-g]quinolin-6(5H)-one (3q):** Yield: 39 mg (76%), white solid, mp: 121-123 °C;  $^1H$  NMR (300 MHz, Chloroform- $d$ )  $\delta$  8.03 (d,  $J = 8.4$  Hz, 2H), 7.28 (d,  $J = 6.6$  Hz, 1H), 7.25 – 7.18 (m, 2H), 7.08 – 7.00 (m, 4H), 6.97 (s, 1H), 6.76 – 6.69 (m, 1H), 6.62 (s, 1H), 6.00 – 5.91 (m, 2H), 3.76 (d,  $J = 5.8$  Hz, 1H), 3.37 (dd,  $J = 14.7, 4.2$  Hz, 1H), 3.20 – 3.07 (m, 1H), 2.53 (dd,  $J = 14.7, 10.1$  Hz, 1H), 2.48 (s, 3H);  $^{13}C$  NMR (75 MHz, Chloroform- $d$ )  $\delta$  171.91, 146.62, 145.46, 145.05, 138.87, 138.59, 136.93, 136.62, 129.47, 129.27, 129.18, 128.95, 128.61, 128.18, 127.19, 126.49, 125.10, 107.91, 104.94, 101.74, 49.41, 44.97, 32.40, 21.76, 21.41; HRMS (ESI,  $m/z$ ): calcd. for  $C_{31}H_{27}NO_5S[M+Na]^+$  548.1503, found 548.1493;  $[\alpha]^{25}_D = +200.3$  ( $c = 0.3$ ,  $CH_2Cl_2$ ); HPLC analysis: 99% ee (Chiralcel IB N-5, 20:80  $i$ PrOH/Hexane, 0.5 mL/min),  $R_t$  (minor) = 17.2 min,  $R_t$  (major) = 14.8 min.

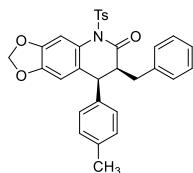

**(7S,8S)-7-benzyl-8-(p-tolyl)-5-tosyl-7,8-dihydro-[1,3]dioxolo[4,5-g]quinolin-6(5H)-one (3r):** Yield: 41 mg (78%), white solid, mp: 122-124 °C;  $^1H$  NMR (300 MHz, Chloroform- $d$ )  $\delta$  8.01 (d,  $J = 8.4$  Hz, 2H), 7.42 (s, 1H), 7.36 (d,  $J = 8.1$  Hz, 2H), 7.28 (t,  $J = 2.0$  Hz, 1H), 7.26 – 7.19 (m, 2H), 7.07 – 6.99 (m, 2H), 6.95 (d,  $J = 8.0$  Hz, 2H), 6.84 (d,  $J = 8.2$  Hz, 2H), 6.60 (s, 1H), 6.02 – 5.80 (m, 2H), 3.74 (d,  $J = 5.7$  Hz, 1H), 3.35 (dd,  $J = 14.6, 4.2$  Hz, 1H), 3.20 – 3.07 (m, 1H), 2.60 – 2.40 (m, 4H), 2.29 (s, 3H);  $^{13}C$  NMR (75 MHz, Chloroform- $d$ )  $\delta$  171.84, 146.58, 145.47, 145.05, 138.86, 136.94, 136.37, 134.00, 129.46, 129.38, 128.94, 128.61, 128.09, 127.25, 126.48, 107.83, 105.04, 101.72, 49.37, 44.71, 32.35, 21.75, 21.04; HRMS (ESI,  $m/z$ ): calcd. for  $C_{31}H_{27}NO_5S[M+Na]^+$  548.1503, found 548.1494;  $[\alpha]^{25}_D = +197.3$  ( $c = 0.3$ ,  $CH_2Cl_2$ ); HPLC analysis: 99% ee (Chiralcel IB N-5, 20:80  $i$ PrOH/Hexane, 0.5 mL/min),  $R_t$  (minor) = 22.5 min,  $R_t$  (major) = 20.7 min.

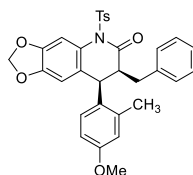

**(7S,8S)-7-benzyl-8-(4-methoxy-2-methylphenyl)-5-tosyl-7,8-dihydro-[1,3]dioxolo[4,5-g]quinolin-6(5H)-one (3s):** Yield: 29 mg (52%), white solid, mp: 113-115 °C;  $^1H$  NMR (400 MHz, Chloroform- $d$ )  $\delta$  8.08 (d,  $J = 8.5$  Hz, 2H), 7.46 – 7.36 (m, 3H), 7.20 (d,  $J = 7.6$  Hz, 3H), 6.90 – 6.81 (m, 2H), 6.72 (d,  $J = 8.5$  Hz, 2H), 6.62 (s, 1H), 6.02 – 5.80 (m, 2H), 3.74 (d,  $J = 5.7$  Hz, 1H), 3.35 (dd,  $J = 14.6, 4.2$  Hz, 1H), 3.20 – 3.07 (m, 1H), 2.60 – 2.40 (m, 4H), 2.29 (s, 3H), 3.78 (s, 3H);  $^{13}C$  NMR (100 MHz, Chloroform- $d$ )  $\delta$  171.84, 146.58, 145.47, 145.05, 138.86, 136.94, 136.37, 134.00, 129.46, 129.38, 128.94, 128.61, 128.09, 127.25, 126.48, 107.83, 105.04, 101.72, 49.37, 44.71, 32.35, 21.75, 21.04, 55.99; HRMS (ESI,  $m/z$ ): calcd. for  $C_{32}H_{29}NO_6S[M+Na]^+$  564.1653, found 564.1643;  $[\alpha]^{25}_D = +197.3$  ( $c = 0.3$ ,  $CH_2Cl_2$ ); HPLC analysis: 99% ee (Chiralcel IB N-5, 20:80  $i$ PrOH/Hexane, 0.5 mL/min),  $R_t$  (minor) = 22.5 min,  $R_t$  (major) = 20.7 min.

= 8.6 Hz, 1H), 6.67 (d,  $J$  = 2.8 Hz, 1H), 6.60 (s, 1H), 6.41 (dd,  $J$  = 8.7, 2.9 Hz, 1H), 5.94 (dd,  $J$  = 13.3, 1.4 Hz, 2H), 3.96 (d,  $J$  = 6.3 Hz, 1H), 3.76 (s, 3H), 3.28 (dd,  $J$  = 14.4, 4.7 Hz, 1H), 3.21 – 3.14 (m, 1H), 2.51 (s, 3H), 2.43 – 2.35 (m, 1H), 2.03 (s, 3H);  $^{13}\text{C}$  NMR (75 MHz, Chloroform- $d$ )  $\delta$  172.51, 158.18, 146.36, 145.39, 145.20, 138.49, 137.78, 136.34, 129.54, 129.46, 128.79, 128.58, 128.24, 127.95, 126.92, 126.49, 116.89, 111.71, 107.70, 105.08, 101.70, 55.08, 49.21, 39.10, 32.46, 21.78, 20.68; HRMS (ESI,  $m/z$ ): calcd. for  $\text{C}_{32}\text{H}_{29}\text{NO}_6\text{S}[\text{M}+\text{Na}]^+$  578.1608, found 578.1600;  $[\alpha]_D^{25} = +262.5$  ( $c$  = 0.2,  $\text{CH}_2\text{Cl}_2$ ); HPLC analysis: 99% ee (Chiralcel IB N-5, 20:80  $i$ PrOH/Hexane, 0.5 mL/min),  $R_t$  (minor) = 24.8 min,  $R_t$  (major) = 22.8 min.

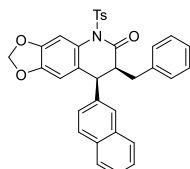

**(7S,8S)-7-benzyl-8-(naphthalen-2-yl)-5-tosyl-7,8-dihydro-[1,3]dioxolo[4,5-g]quinolin-6(5H)-one (3t):** Yield: 48 mg (86%), white solid, mp: 123-125 °C;  $^1\text{H}$  NMR (300 MHz, Chloroform- $d$ )  $\delta$  7.94 (d,  $J$  = 8.4 Hz, 2H), 7.83 – 7.73 (m, 1H), 7.65 (t,  $J$  = 7.8 Hz, 2H), 7.56 – 7.38 (m, 4H), 7.28 (d,  $J$  = 6.4 Hz, 1H), 7.25 – 7.22 (m, 2H), 7.20 (s, 1H), 7.15 (dd,  $J$  = 8.5, 2.0 Hz, 1H), 7.08 – 7.00 (m, 2H), 6.71 (s, 1H), 5.97 (dd,  $J$  = 8.0, 1.4 Hz, 2H), 3.96 (d,  $J$  = 5.6 Hz, 1H), 3.45 (dd,  $J$  = 14.6, 4.3 Hz, 1H), 3.31 – 3.14 (m, 1H), 2.65 (dd,  $J$  = 14.7, 10.1 Hz, 1H), 2.43 (s, 3H);  $^{13}\text{C}$  NMR (75 MHz, Chloroform- $d$ )  $\delta$  171.92, 146.74, 145.55, 145.00, 138.82, 136.45, 134.55, 133.33, 132.48, 129.40, 129.17, 128.93, 128.67, 128.50, 128.23, 127.44, 127.09, 126.93, 126.57, 126.38, 126.12, 126.08, 107.94, 105.24, 101.79, 49.50, 44.92, 32.62, 21.74; HRMS (ESI,  $m/z$ ): calcd. for  $\text{C}_{34}\text{H}_{27}\text{NO}_5\text{S}[\text{M}+\text{Na}]^+$  584.1503, found 584.1496;  $[\alpha]_D^{25} = +215.8$  ( $c$  = 0.4,  $\text{CH}_2\text{Cl}_2$ ); HPLC analysis: 99% ee (Chiralcel IB N-5, 20:80  $i$ PrOH/Hexane, 0.5 mL/min),  $R_t$  (minor) = 26.5 min,  $R_t$  (major) = 22.5 min.

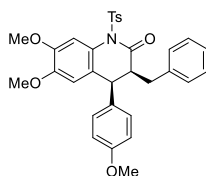

**(3S,4S)-3-benzyl-6,7-dimethoxy-4-(4-methoxyphenyl)-1-tosyl-3,4-dihydroquinolin-2(1H)-one (3u):** Yield: 48 mg (83%), white solid, mp: 108-110 °C;  $^1\text{H}$  NMR (400 MHz, Chloroform- $d$ )  $\delta$  8.01 (d,  $J$  = 8.4 Hz, 2H), 7.56 (s, 1H), 7.37 (d,  $J$  = 8.1 Hz, 2H), 7.29 (d,  $J$  = 6.9 Hz, 1H), 7.26 – 7.17 (m, 2H), 7.05 (d,  $J$  = 6.8 Hz, 2H), 6.78 (d,  $J$  = 8.7 Hz, 2H), 6.62 (d,  $J$  = 8.7 Hz, 2H), 6.58 (s, 1H), 3.95 (s, 3H), 3.80 (s, 3H), 3.77 – 3.73 (m, 4H), 3.33 (dd,  $J$  = 14.7, 4.2 Hz, 1H), 3.23 – 3.14 (m, 1H), 2.49 (s, 3H), 2.45 – 2.37 (m, 1H);  $^{13}\text{C}$  NMR (75 MHz, Chloroform- $d$ )  $\delta$  171.78, 158.66, 147.54, 146.98, 145.07, 138.89, 136.29, 129.57, 129.42, 129.36, 129.31, 129.01, 128.62, 128.14, 126.45, 125.65, 114.07, 110.69, 107.76, 56.35, 56.05, 55.17, 49.57, 44.32, 32.31, 21.76; HRMS (ESI,  $m/z$ ): calcd. for  $\text{C}_{32}\text{H}_{31}\text{NO}_6\text{S}[\text{M}+\text{Na}]^+$  580.1756, found 580.1765;  $[\alpha]_D^{25} = +163.5$  ( $c$  = 0.3,  $\text{CH}_2\text{Cl}_2$ ); HPLC analysis: 99% ee (Chiralcel IH, 20:80  $i$ PrOH/Hexane, 0.5 mL/min),  $R_t$  (minor) = 31.9 min,  $R_t$  (major) = 42.1 min.

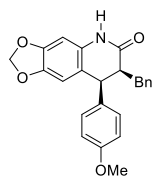

**(7S,8S)-7-benzyl-8-(4-methoxyphenyl)-7,8-dihydro-[1,3]dioxolo[4,5-g]quinolin-6(5H)-one (4):** Yield: 49 mg (91%), white solid, mp: 116-118 °C;  $^1\text{H}$  NMR (300 MHz, Chloroform-*d*)  $\delta$  8.48 (s, 1H), 7.31 (t,  $J$  = 7.2 Hz, 2H), 7.22 (d,  $J$  = 7.5 Hz, 1H), 7.17 – 7.08 (m, 2H), 7.05 – 6.99 (m, 2H), 6.85 – 6.71 (m, 2H), 6.51 (s, 1H), 6.39 (s, 1H), 5.85 (dd,  $J$  = 14.9, 1.4 Hz, 2H), 3.76 (s, 4H), 3.47 (dd,  $J$  = 14.5, 4.5 Hz, 1H), 3.29 (ddd,  $J$  = 10.6, 6.5, 4.3 Hz, 1H), 2.44 (dd,  $J$  = 14.6, 10.3 Hz, 1H);  $^{13}\text{C}$  NMR (75 MHz, Chloroform-*d*)  $\delta$  172.06, 158.76, 147.07, 143.50, 139.74, 132.02, 130.16, 129.06, 128.46, 126.25, 121.22, 114.21, 108.42, 101.22, 97.80, 55.20, 46.14, 44.73, 31.75; HRMS (ESI,  $m/z$ ): calcd. for  $\text{C}_{24}\text{H}_{21}\text{NO}_4\text{S}[\text{M}+\text{H}]^+$  388.1544, found 388.1558;  $[\alpha]_D^{25} = +226.4$  ( $c$  = 0.3,  $\text{CH}_2\text{Cl}_2$ ); HPLC analysis: 99% ee (Chiralcel IB N-5, 20:80  $i$ PrOH/Hexane, 0.5 mL/min),  $R_t$  (minor) = 23.9 min,  $R_t$  (major) = 18.0 min.

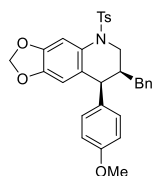

**(7S,8S)-7-benzyl-8-(4-methoxyphenyl)-5-tosyl-5,6,7,8-tetrahydro-[1,3]dioxolo[4,5-g]quinoline (5):** Yield: 41 mg (76%), white solid, mp: 115-117 °C;  $^1\text{H}$  NMR (300 MHz, Chloroform-*d*)  $\delta$  7.78 (d,  $J$  = 8.3 Hz, 2H), 7.33 (d,  $J$  = 8.1 Hz, 2H), 7.28 (d,  $J$  = 7.4 Hz, 1H), 7.24 (s, 1H), 7.22 – 7.12 (m, 3H), 6.83 (s, 1H), 6.71 (q,  $J$  = 8.8 Hz, 4H), 6.57 (s, 1H), 5.85 (dd,  $J$  = 10.3, 1.4 Hz, 2H), 4.05 (d,  $J$  = 11.7 Hz, 1H), 3.77 (s, 3H), 3.49 (d,  $J$  = 10.9 Hz, 1H), 3.15 (d,  $J$  = 12.0 Hz, 1H), 2.75 – 2.60 (m, 2H), 2.49 (s, 3H);  $^{13}\text{C}$  NMR (75 MHz, Chloroform-*d*)  $\delta$  158.03, 146.64, 145.93, 143.51, 140.77, 137.97, 134.46, 133.12, 129.93, 129.39, 128.95, 128.50, 127.47, 127.43, 126.07, 113.94, 107.71, 101.42, 60.23, 55.23, 46.03, 45.27, 34.77, 21.63; HRMS (ESI,  $m/z$ ): calcd. for  $\text{C}_{31}\text{H}_{29}\text{NO}_5\text{S}[\text{M}+\text{H}]^+$  528.1840, found 528.1824;  $[\alpha]_D^{25} = +175.7$  ( $c$  = 0.3,  $\text{CH}_2\text{Cl}_2$ ); HPLC analysis: 99% ee (Chiralcel IB N-5, 20:80  $i$ PrOH/Hexane, 0.5 mL/min),  $R_t$  (minor) = 26.4 min,  $R_t$  (major) = 24.2 min.

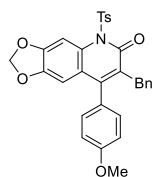

**7-benzyl-8-(4-methoxyphenyl)-5-tosyl-[1,3]dioxolo[4,5-g]quinolin-6(5H)-one (6):** Yield: 47 mg (87%), white solid, mp: 118-120 °C;  $^1\text{H}$  NMR (300 MHz, Chloroform-*d*)  $\delta$  7.88 (d,  $J$  = 8.4 Hz, 2H), 7.30 (d,  $J$  = 8.0 Hz, 2H), 7.18 – 7.09 (m, 4H), 7.07 – 7.01 (m, 2H), 7.00 – 6.93 (m, 2H), 6.90 (dd,  $J$  = 7.4, 2.1 Hz, 2H), 6.62 (s, 1H), 6.02 (s, 2H), 3.93 (s, 2H), 3.86 (s, 3H), 2.44 (s, 3H);  $^{13}\text{C}$  NMR (75 MHz, Chloroform-*d*)  $\delta$  159.52, 154.16, 150.72, 150.46, 147.73, 144.80, 142.57, 139.71, 134.81, 130.43, 129.29, 129.07, 128.44, 128.15, 125.90, 124.41, 121.52, 114.06, 105.01, 102.28, 101.81, 55.36, 33.34, 21.73; HRMS (ESI,  $m/z$ ): calcd. for  $\text{C}_{31}\text{H}_{25}\text{NO}_6\text{S}[\text{M}+\text{H}]^+$  540.1476, found 540.1491;

# VII: $^1\text{H}$ , $^{13}\text{C}$ and HPLC spectra:

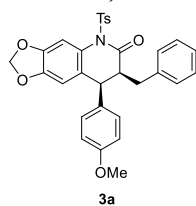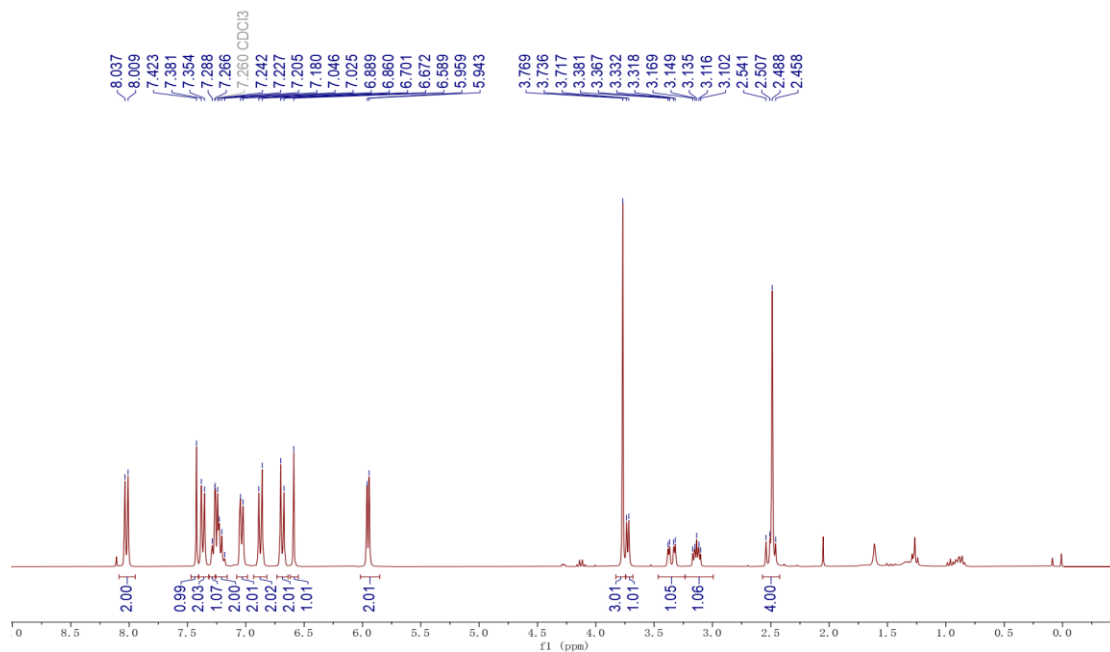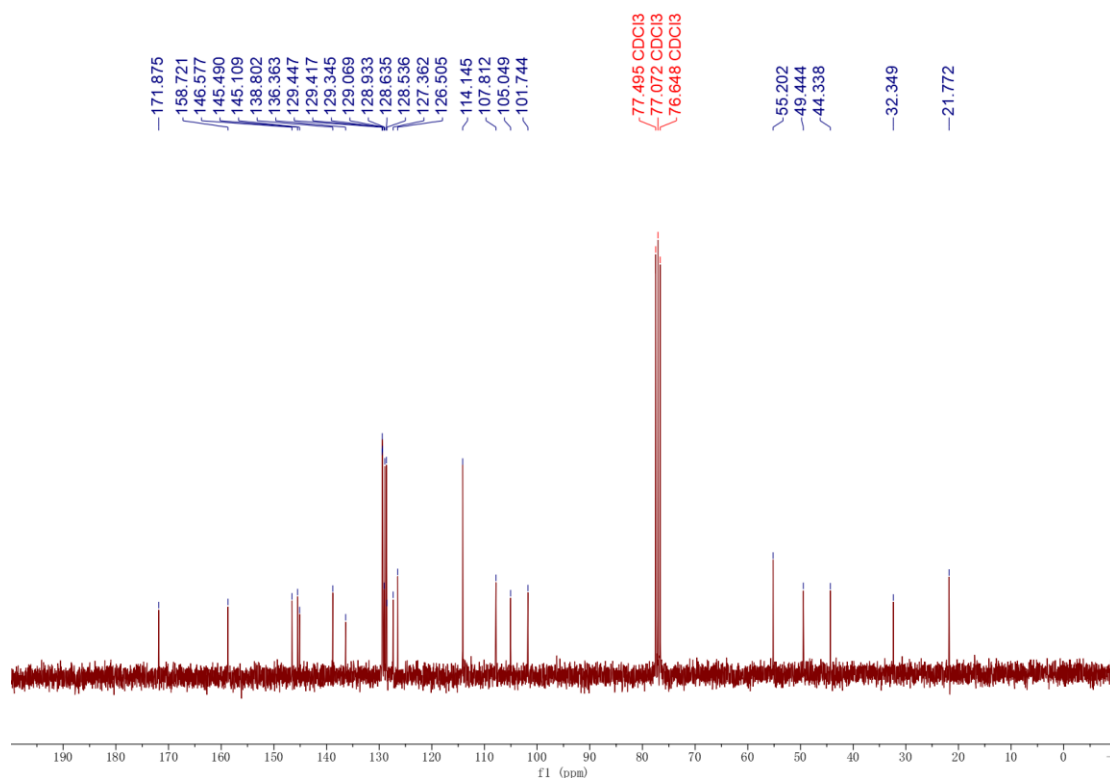

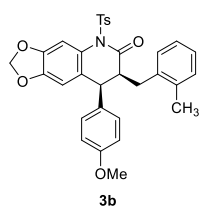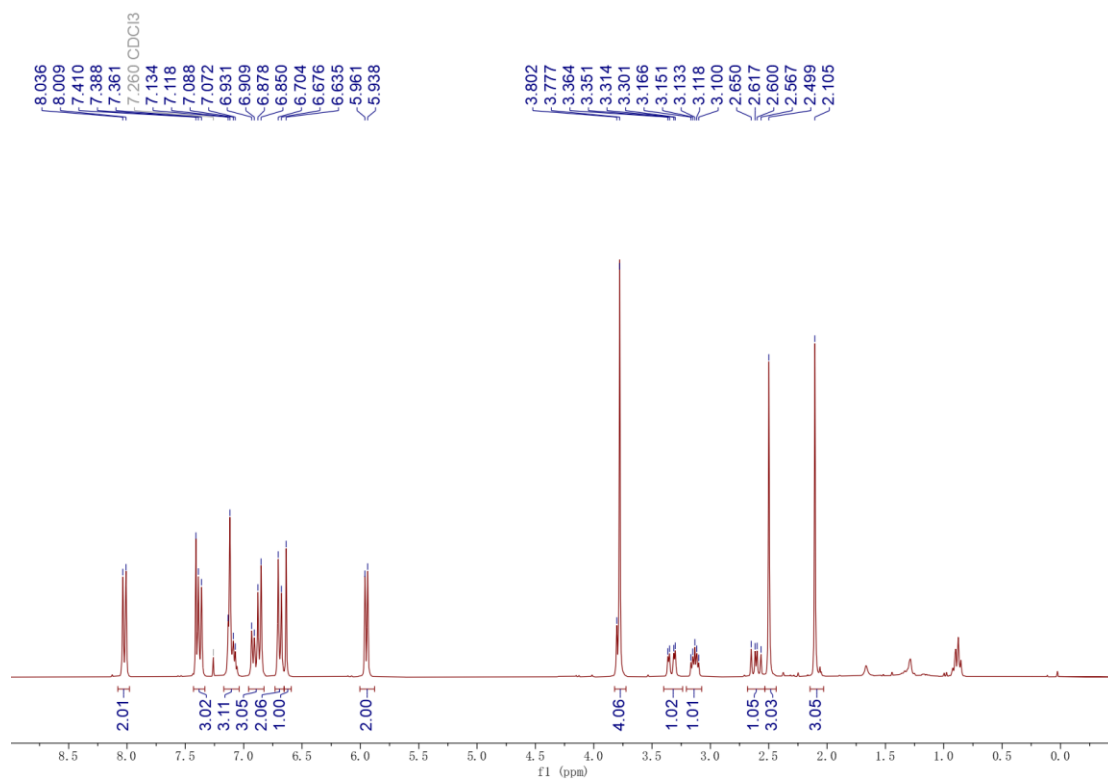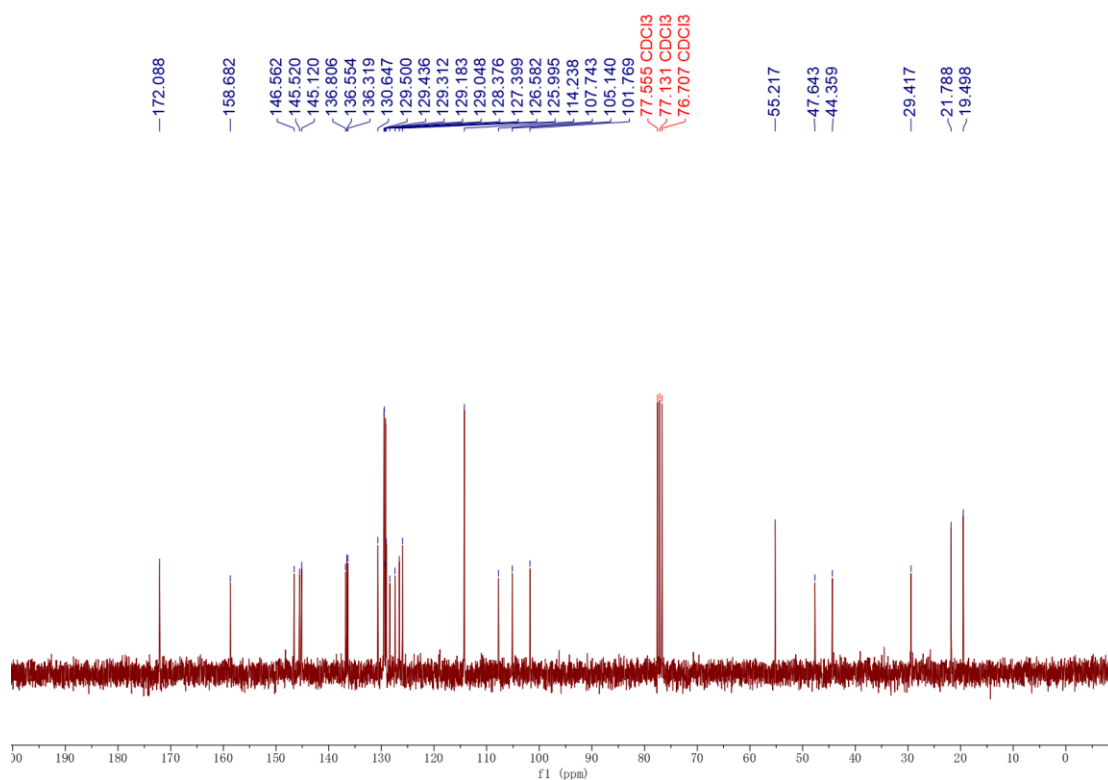

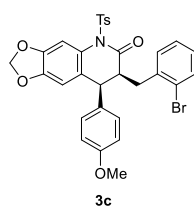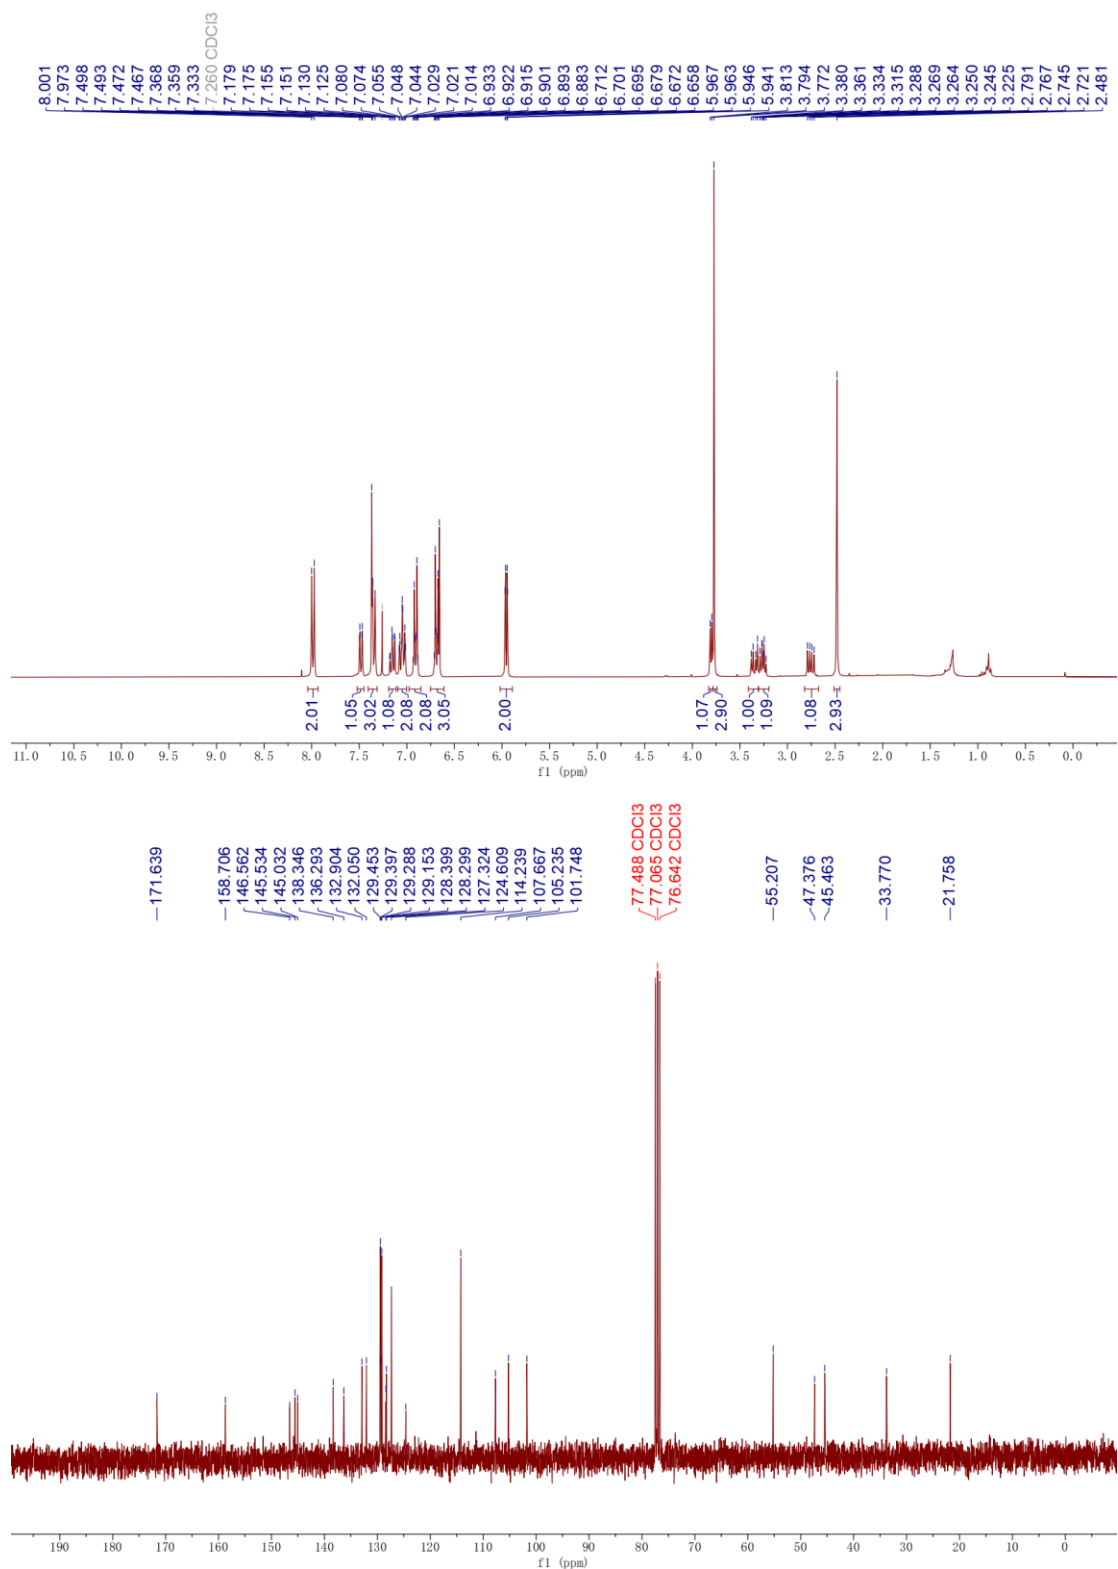

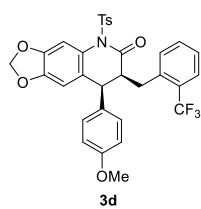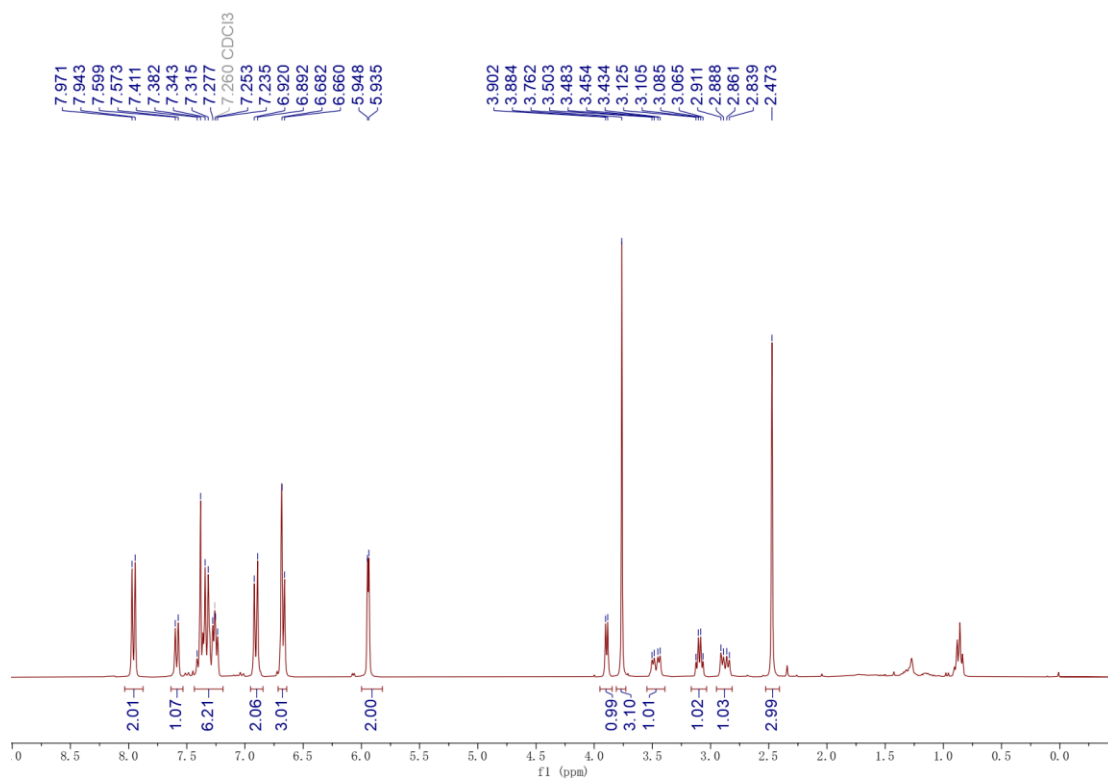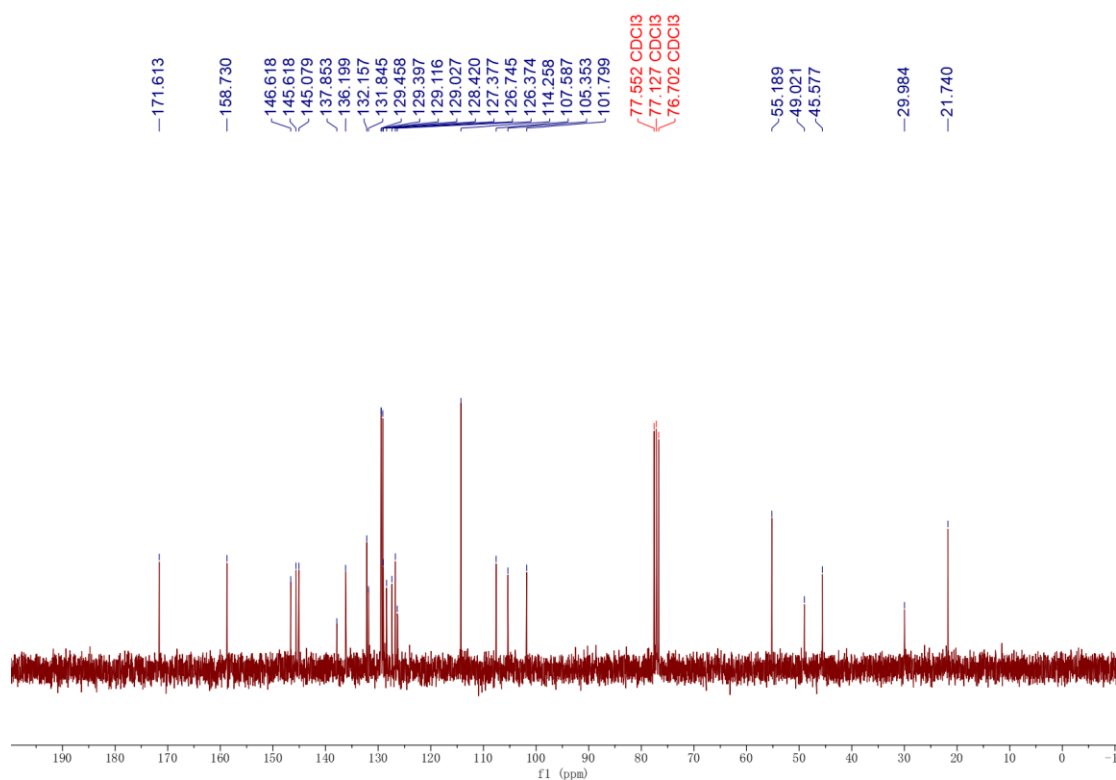

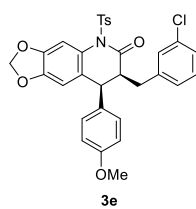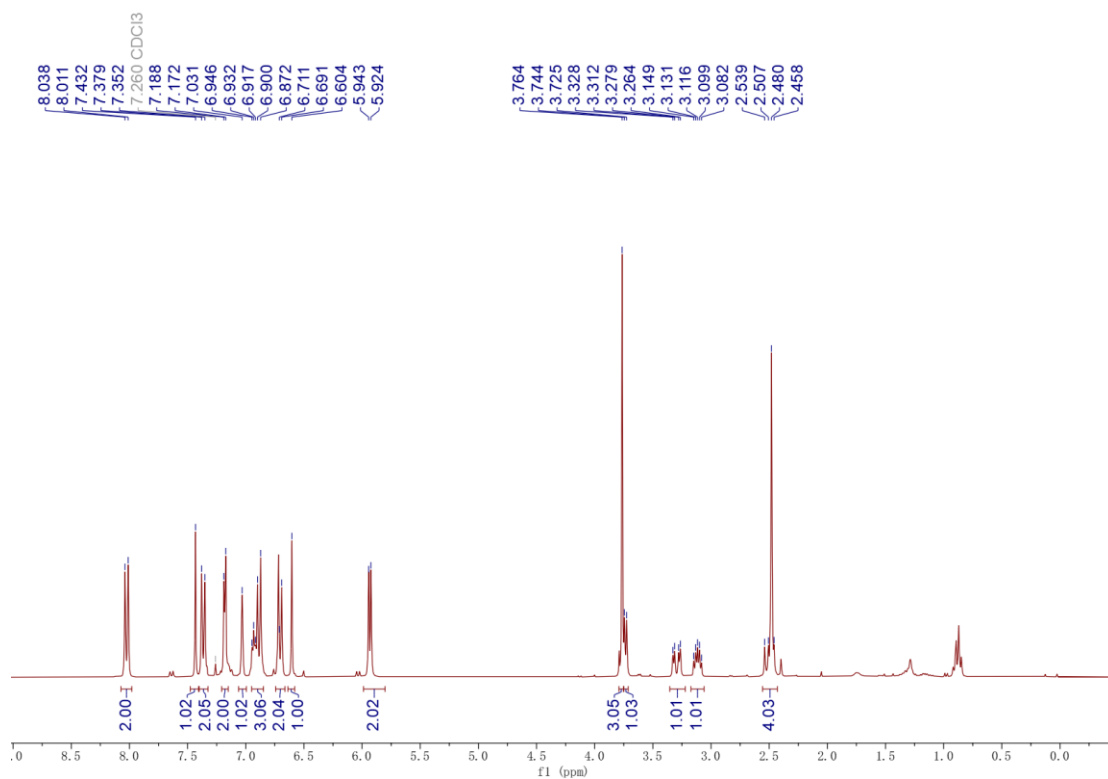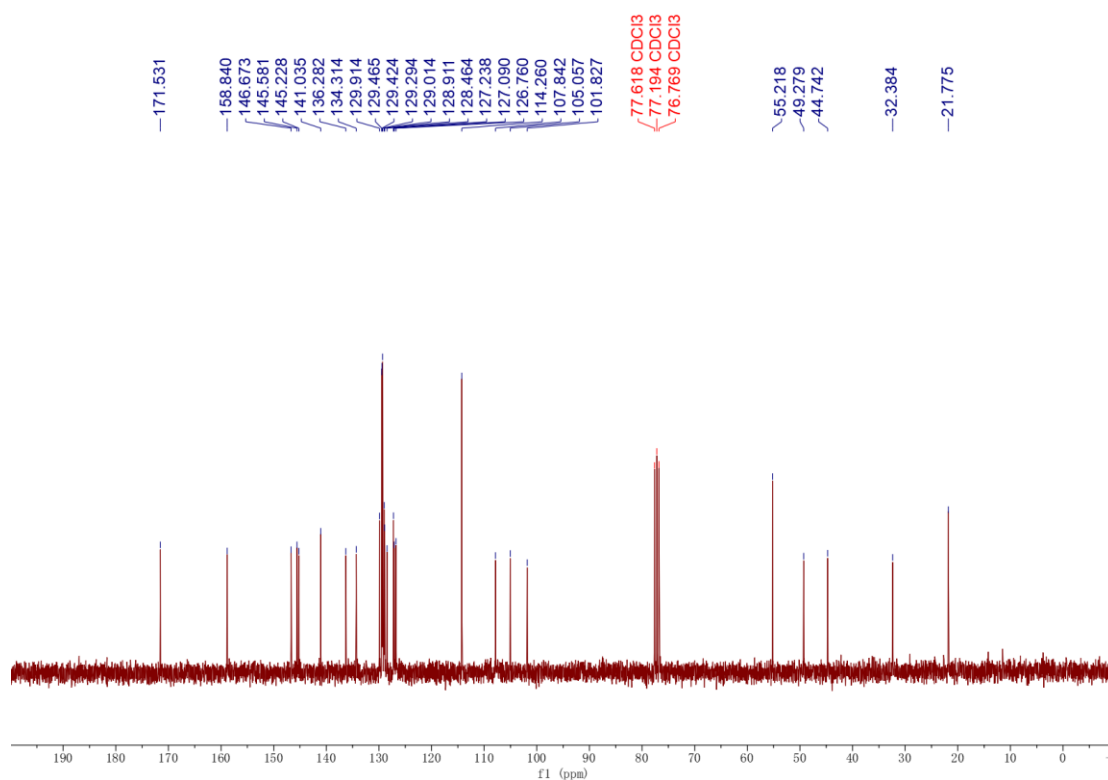

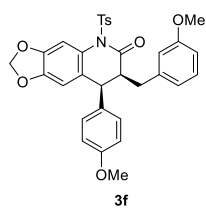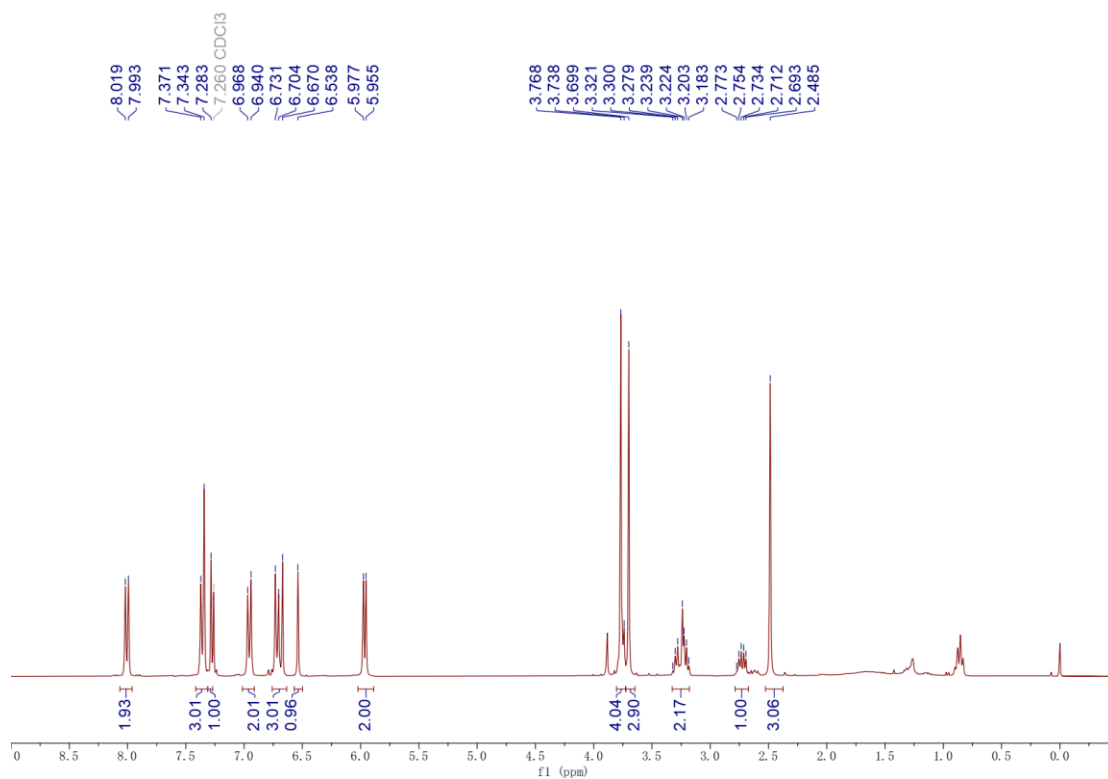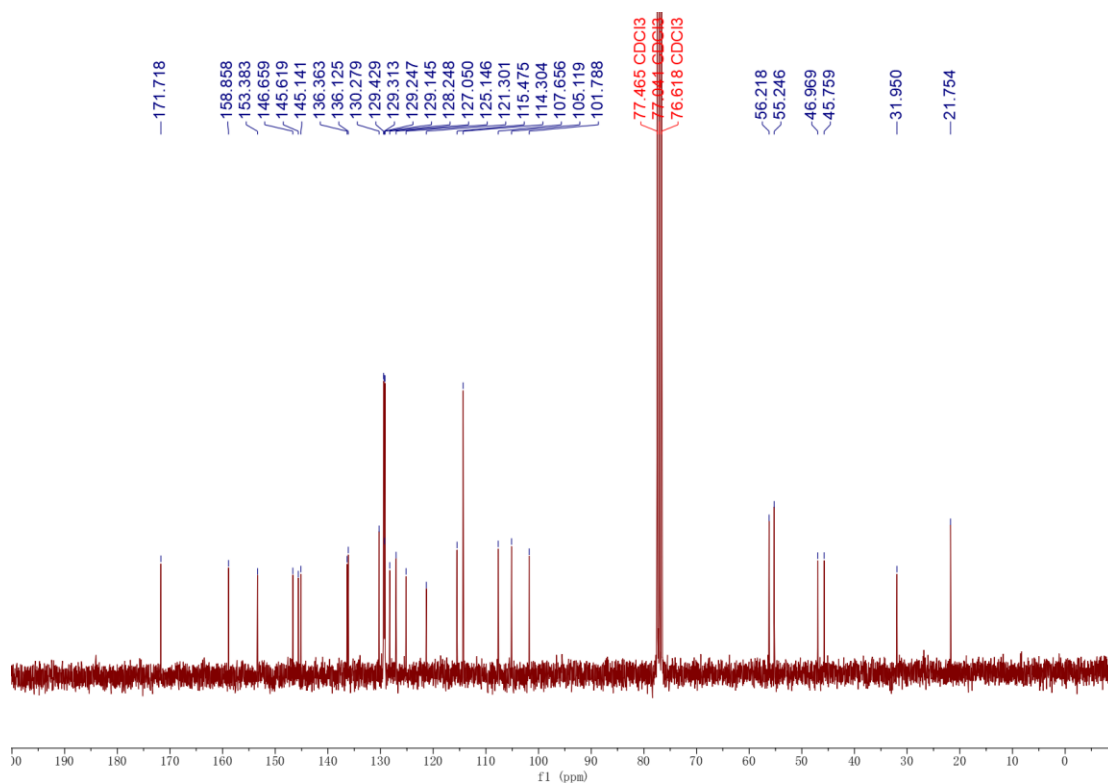

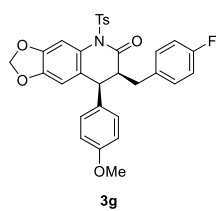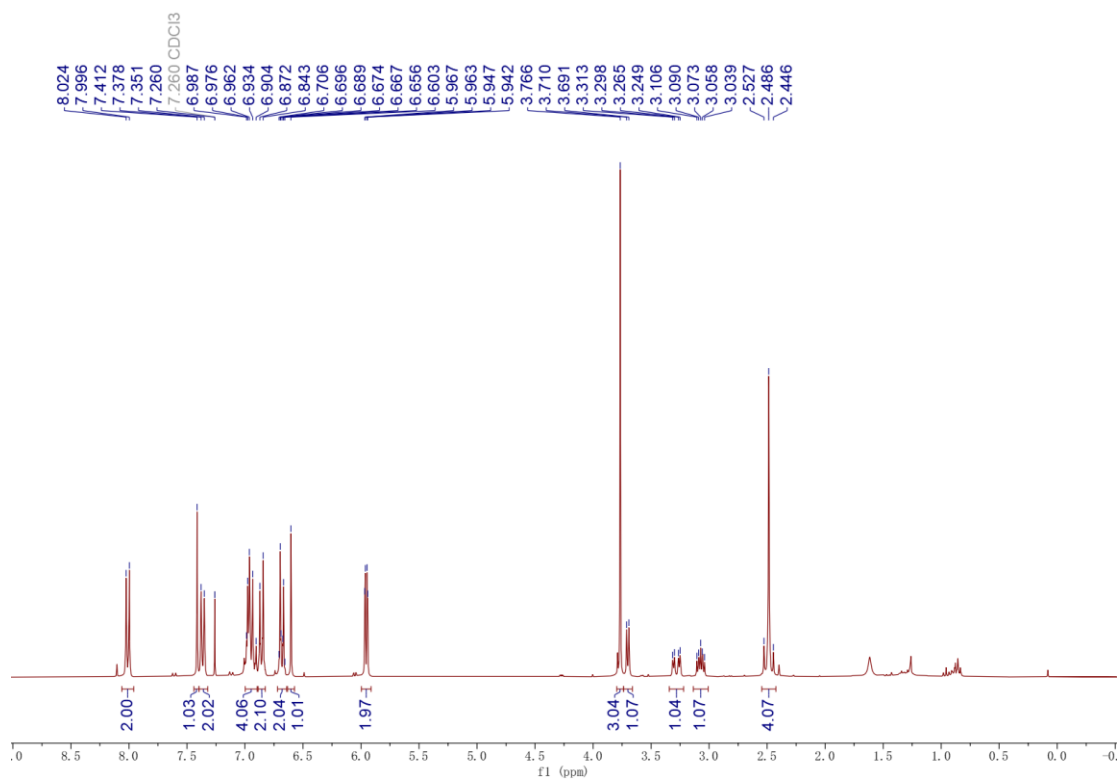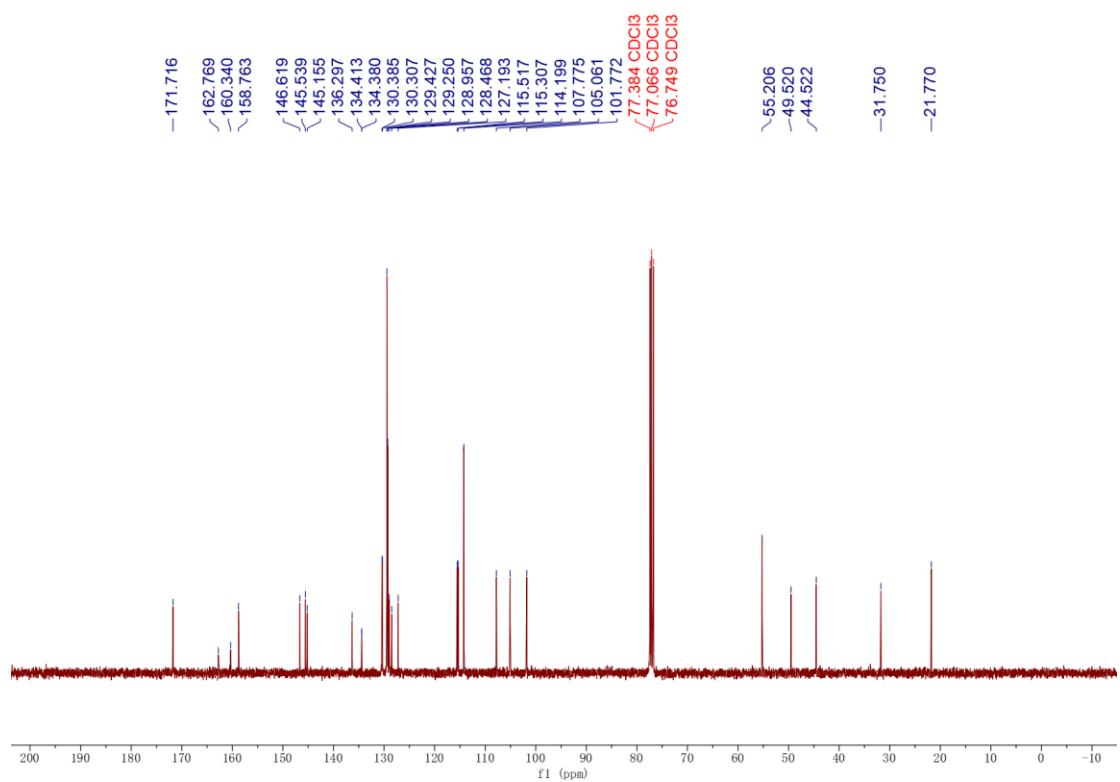

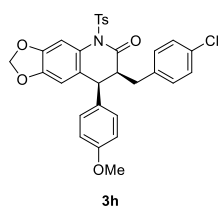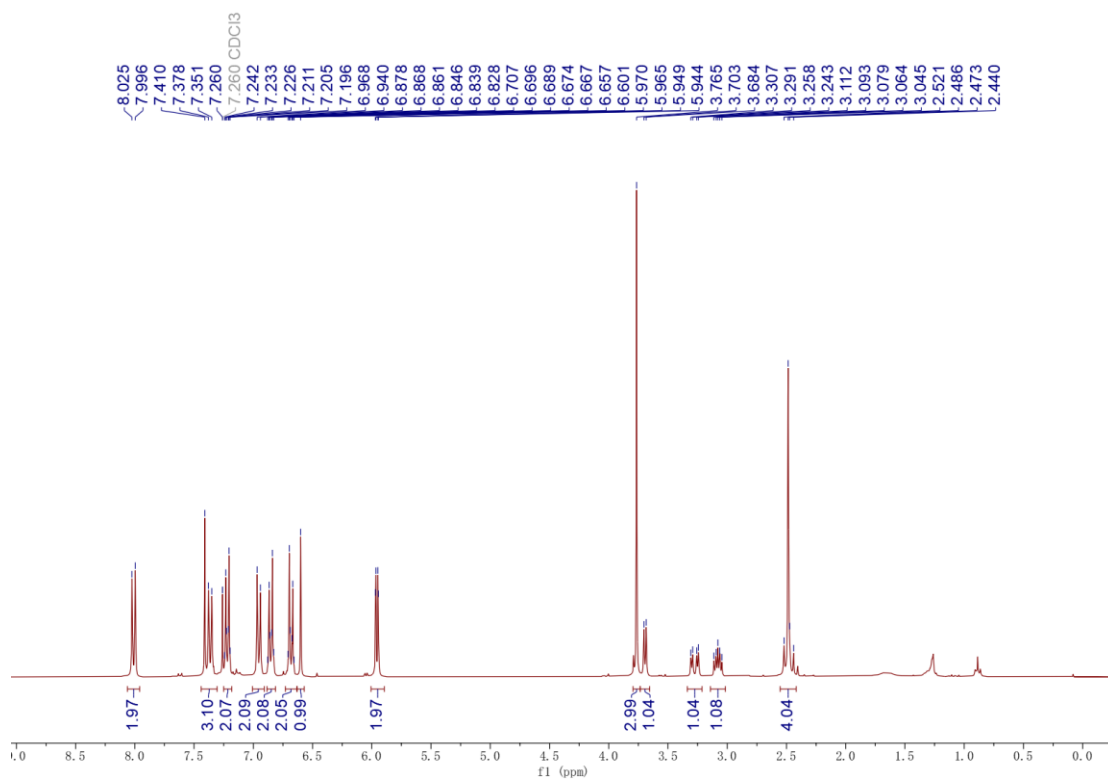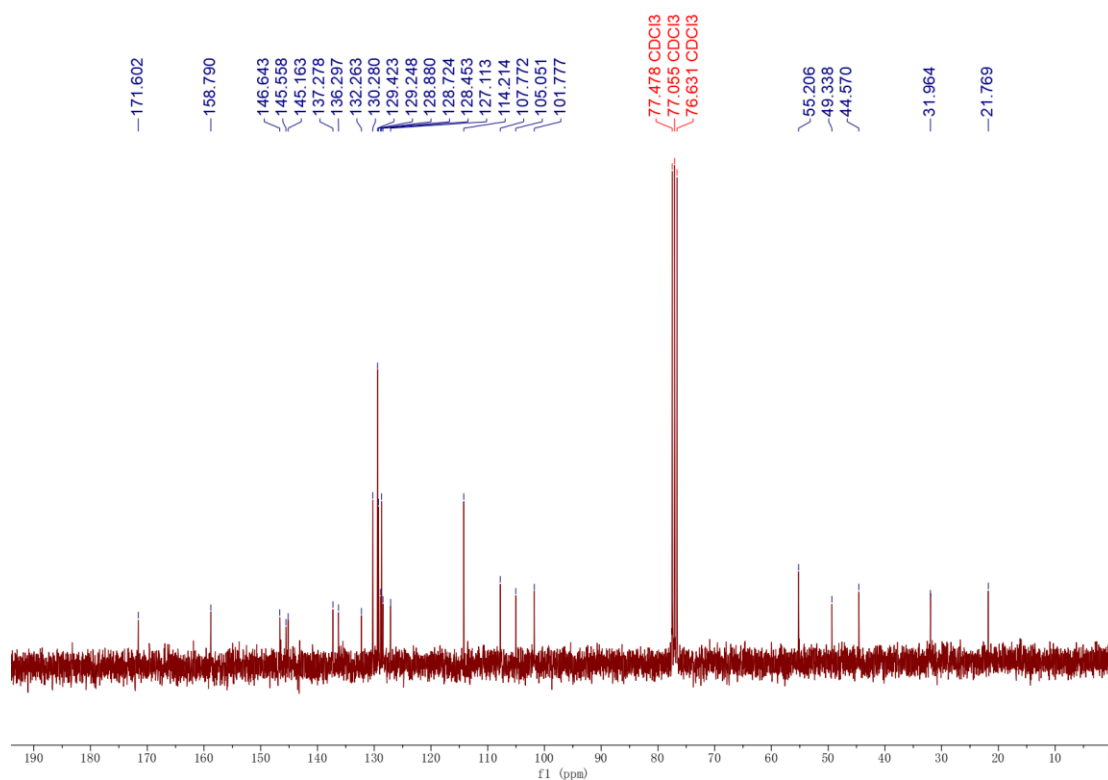

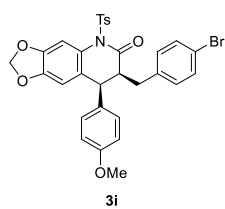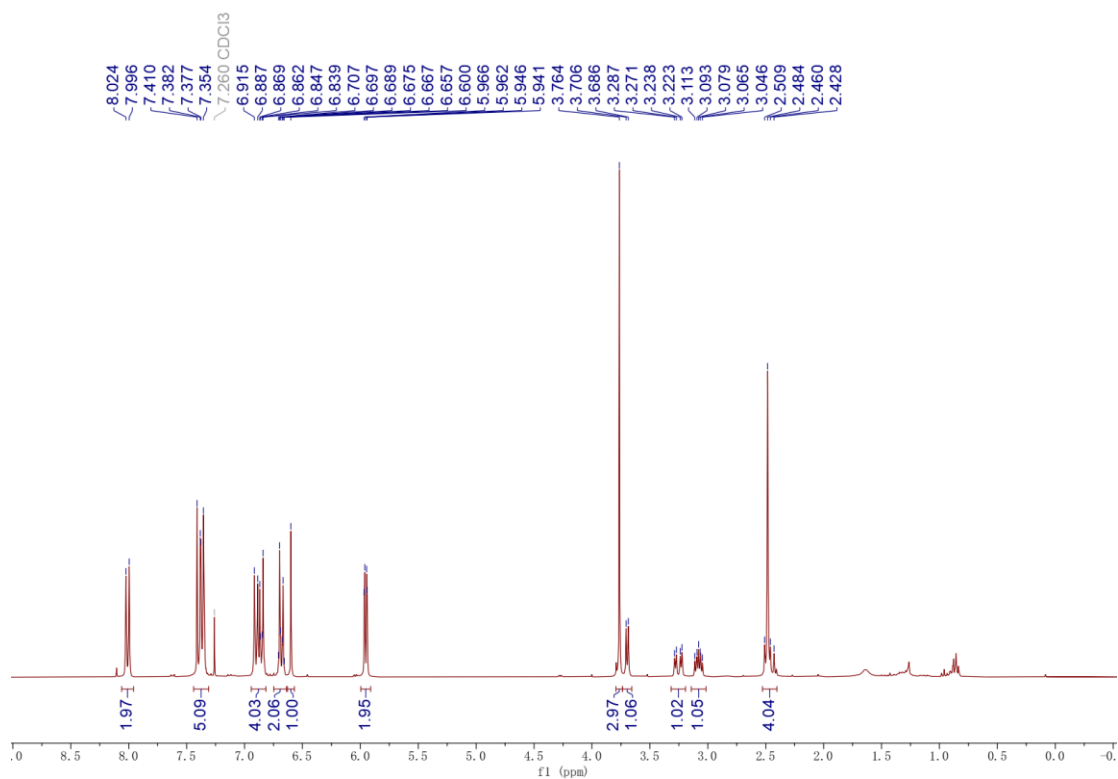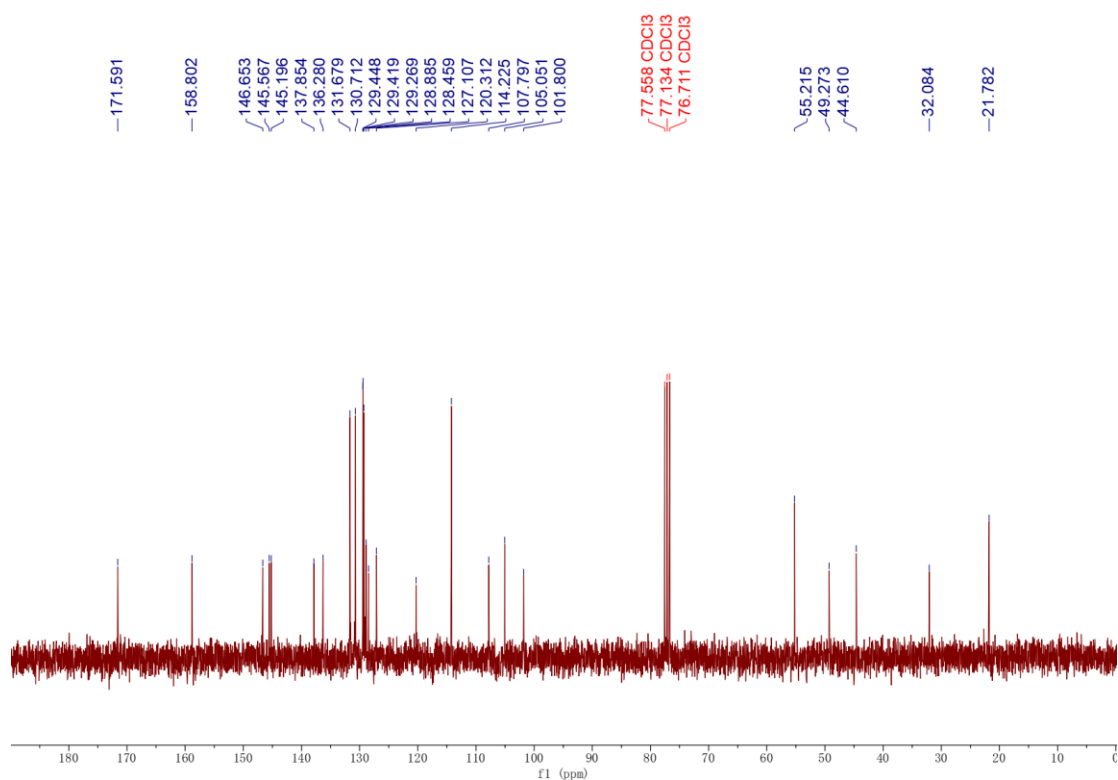

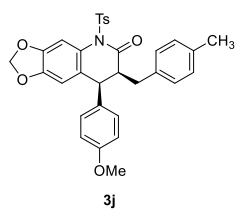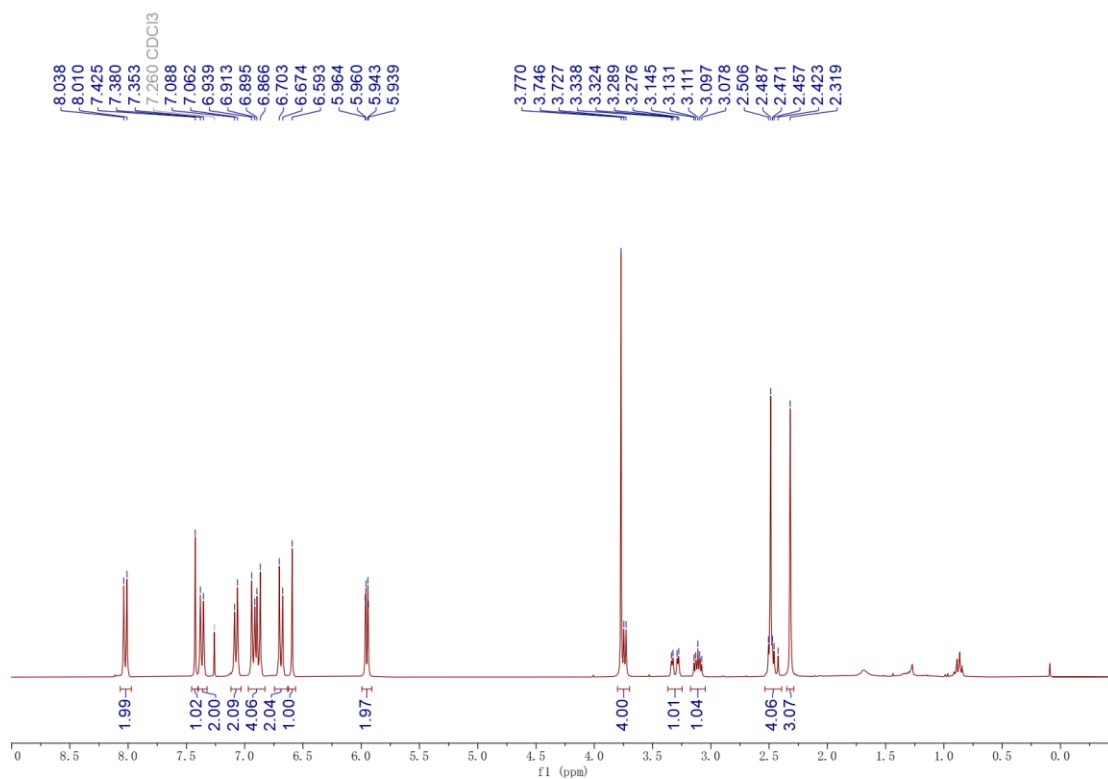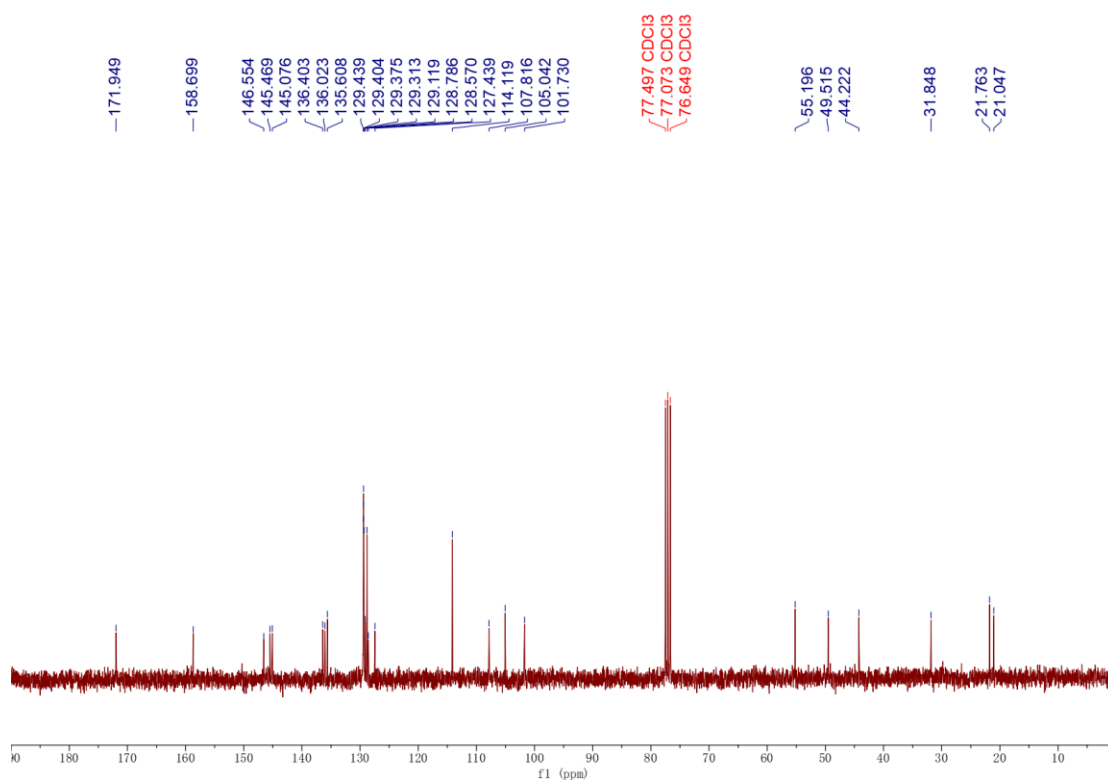

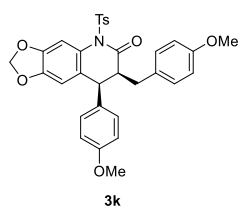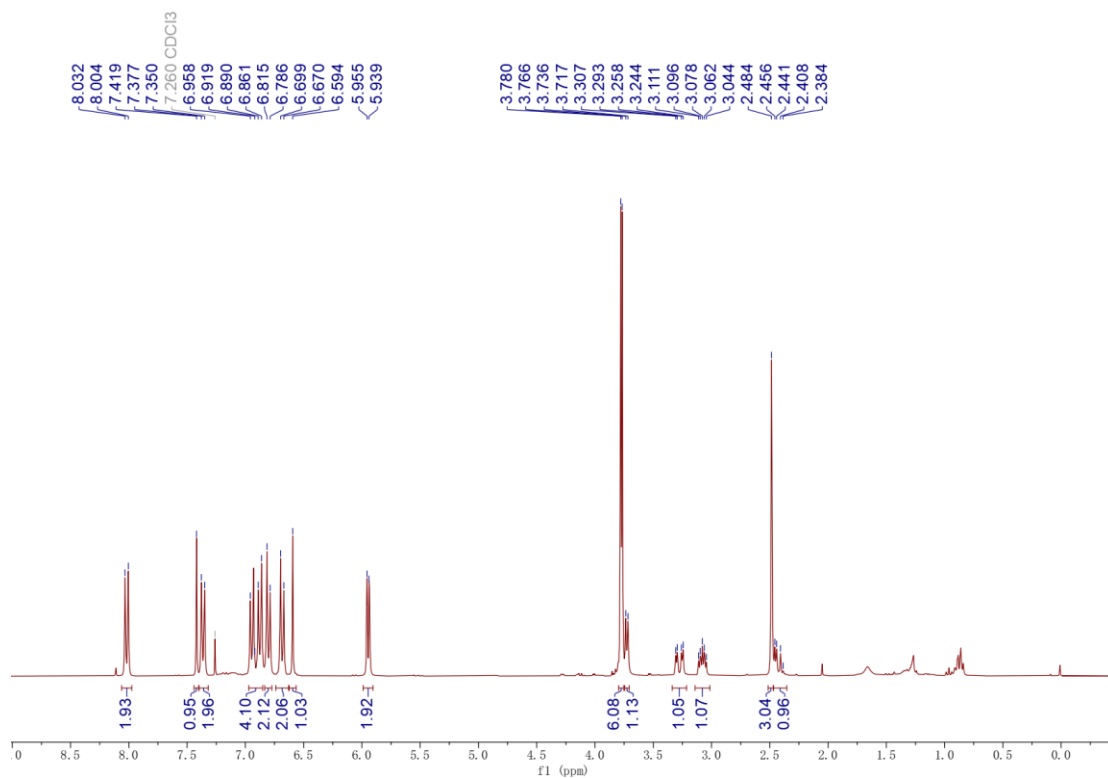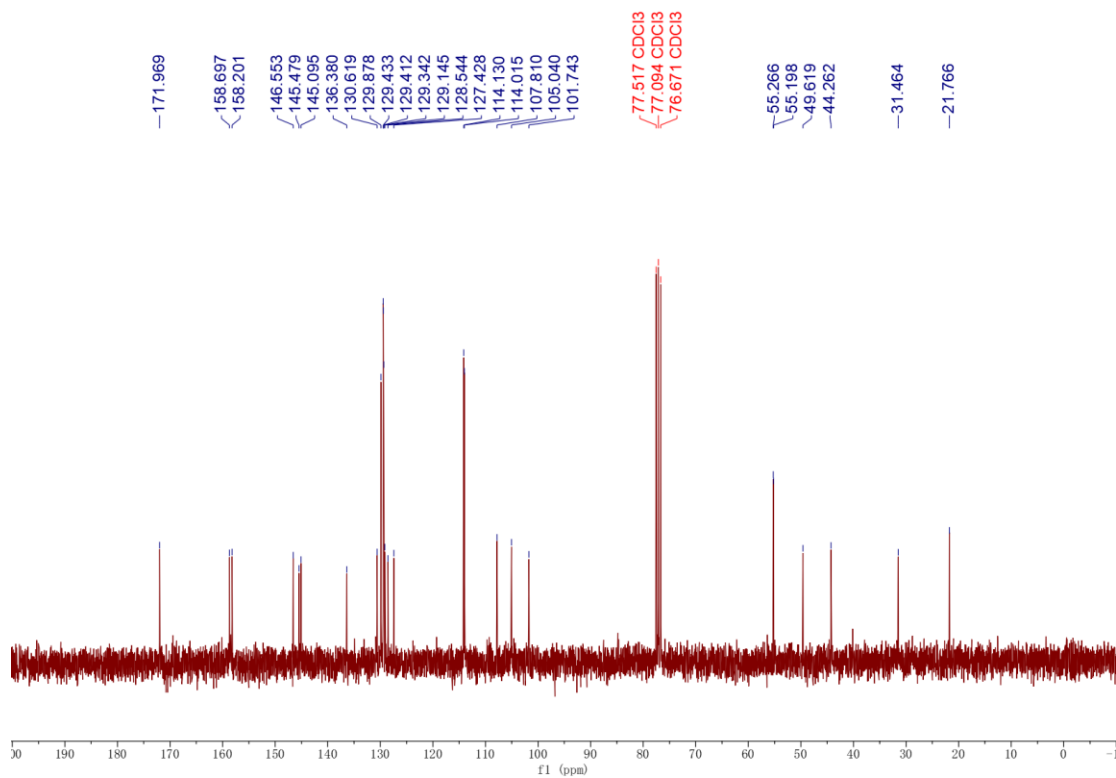

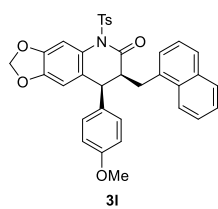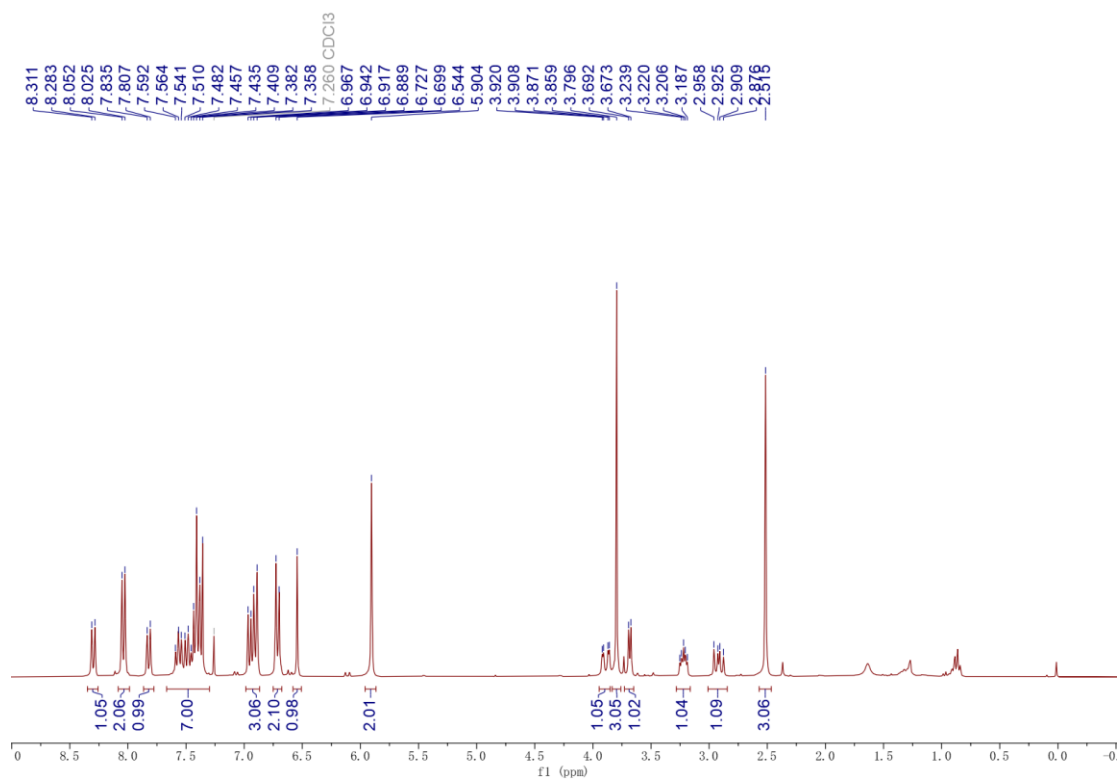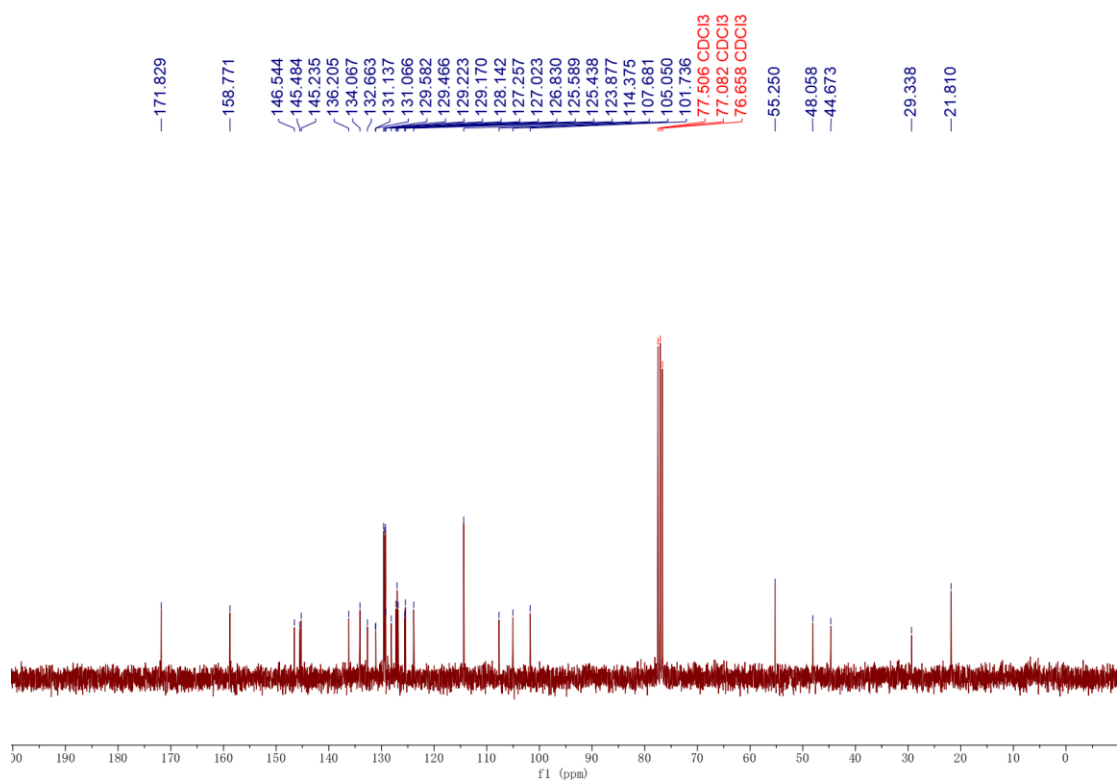

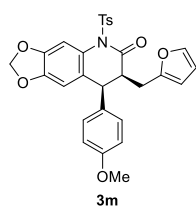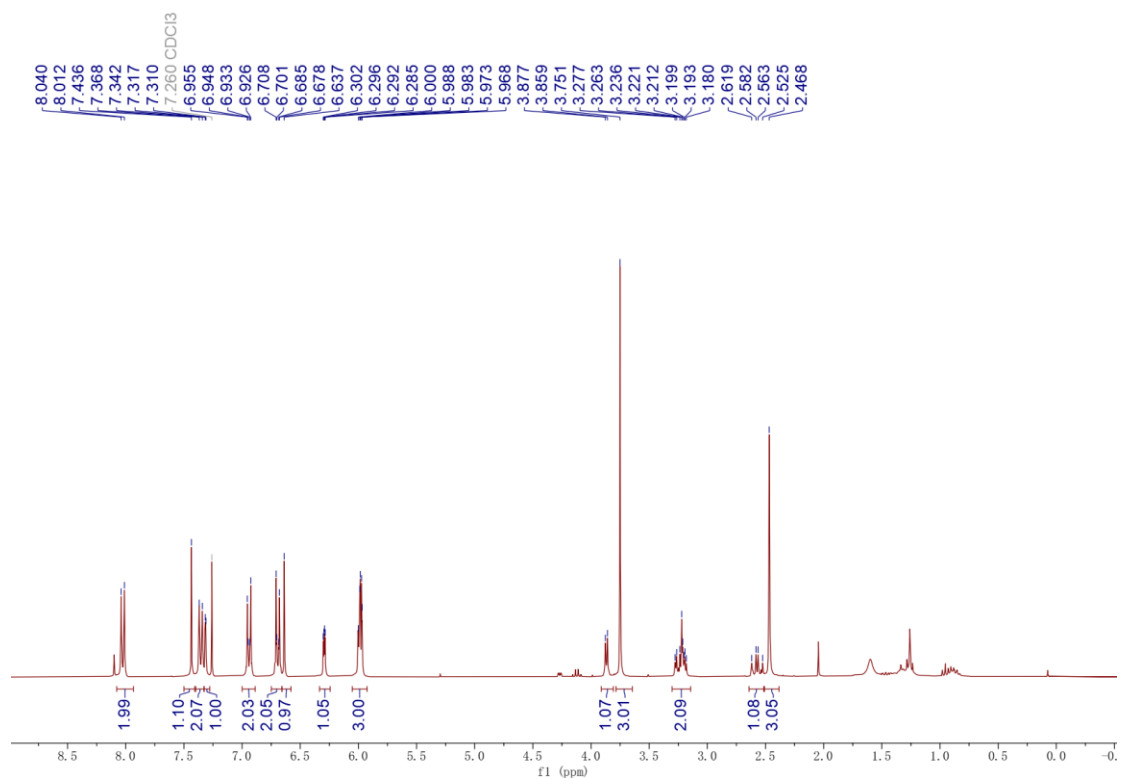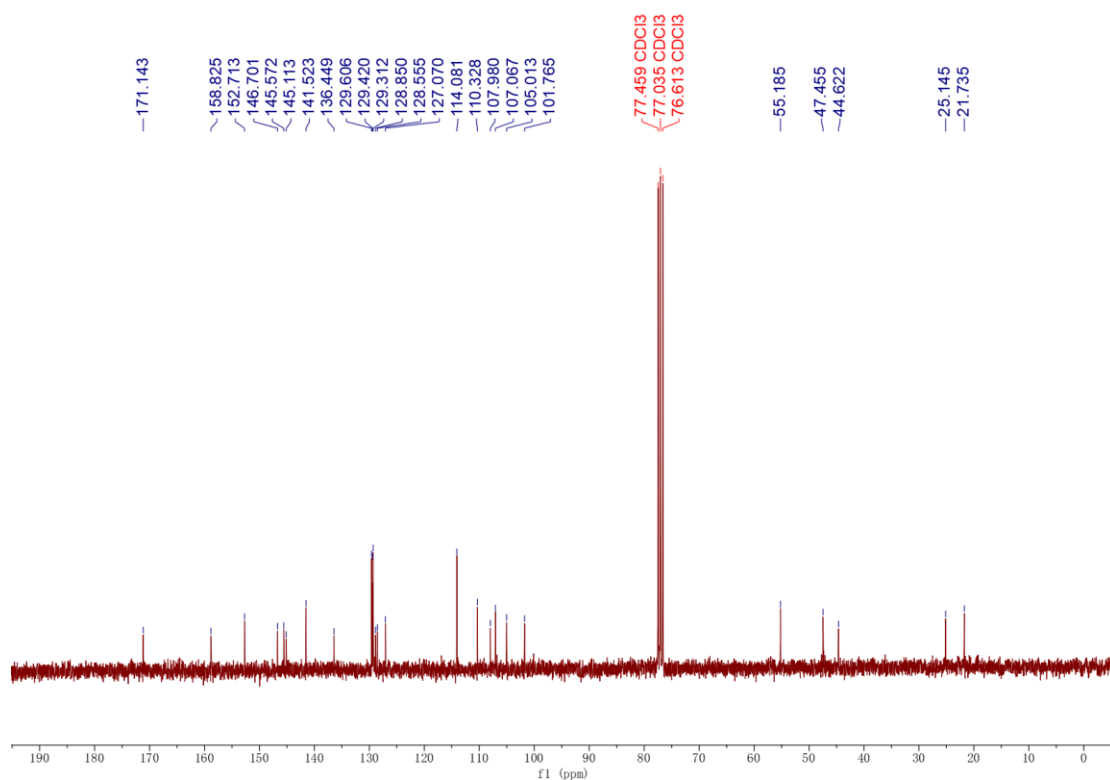

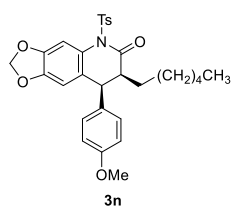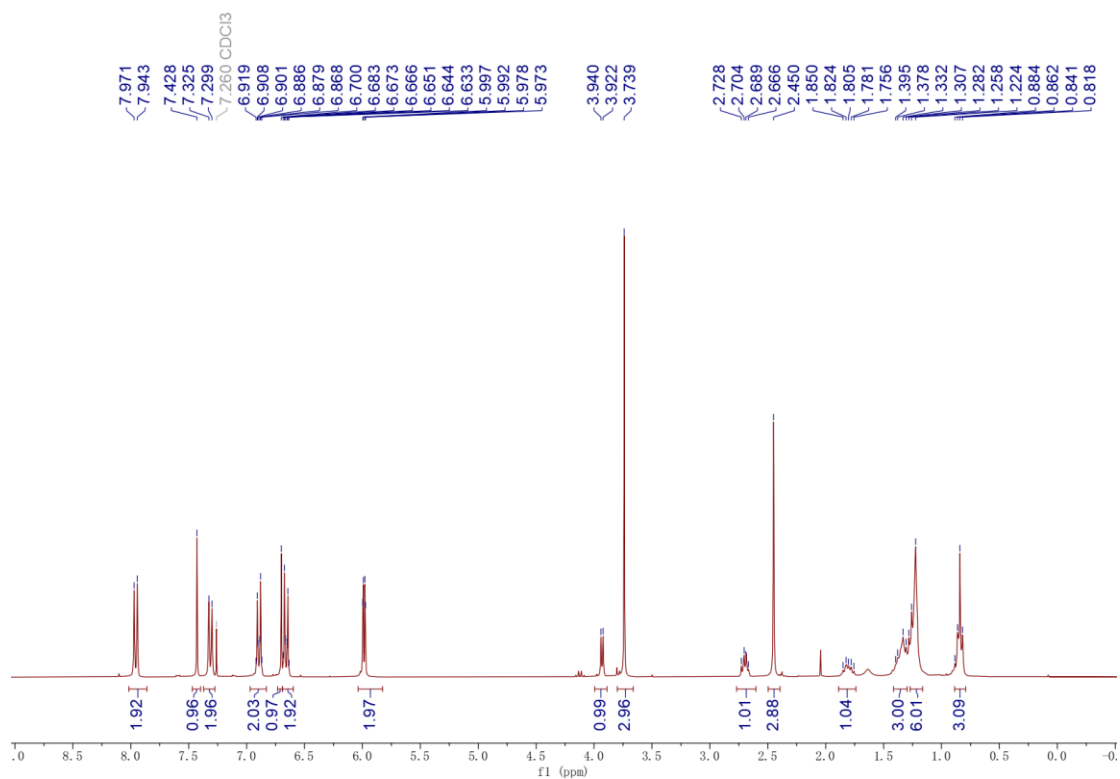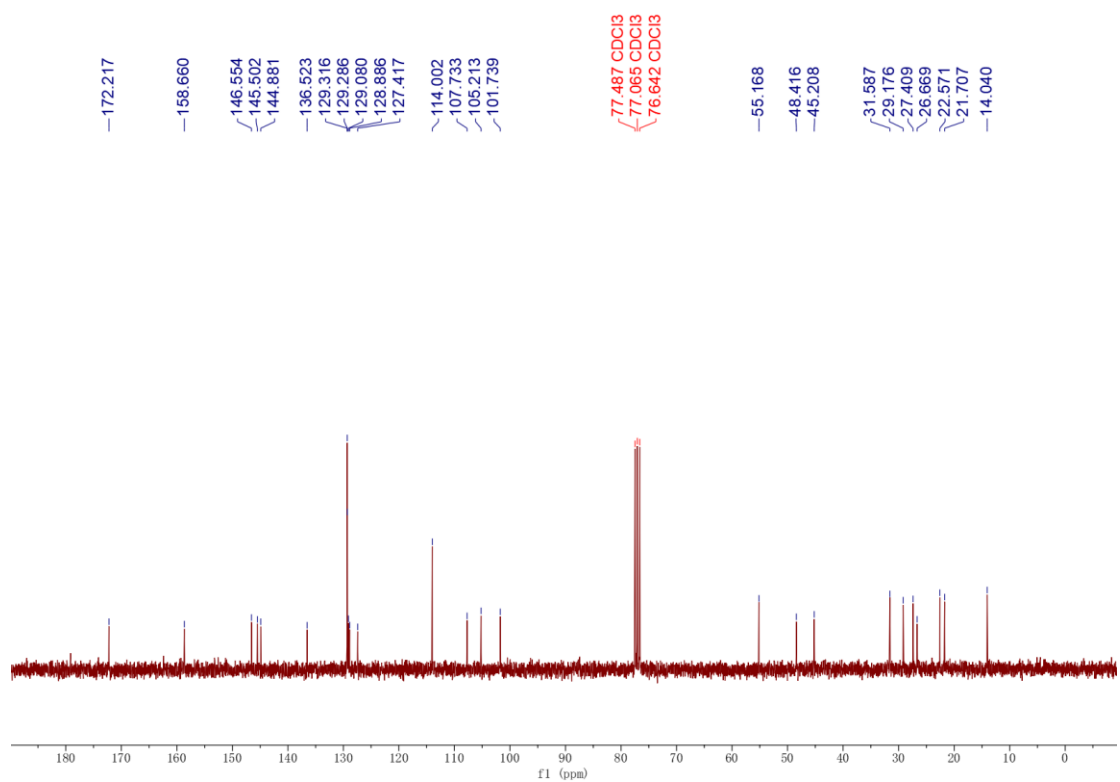

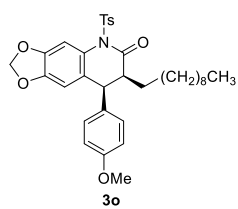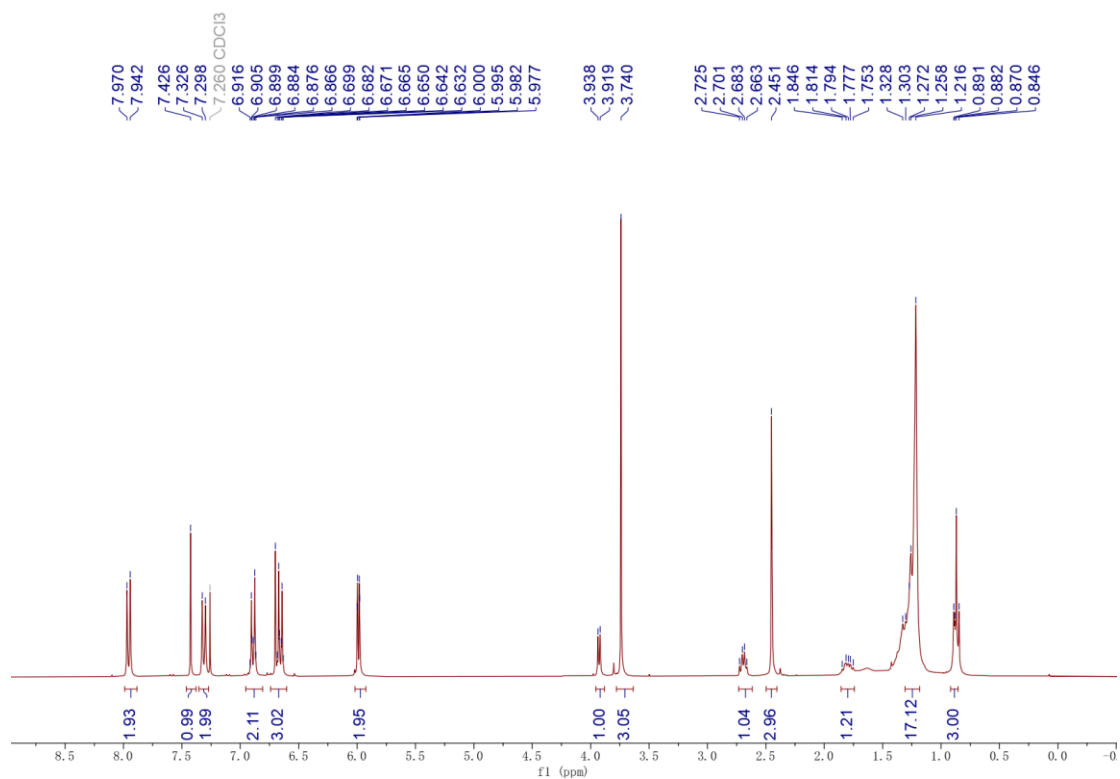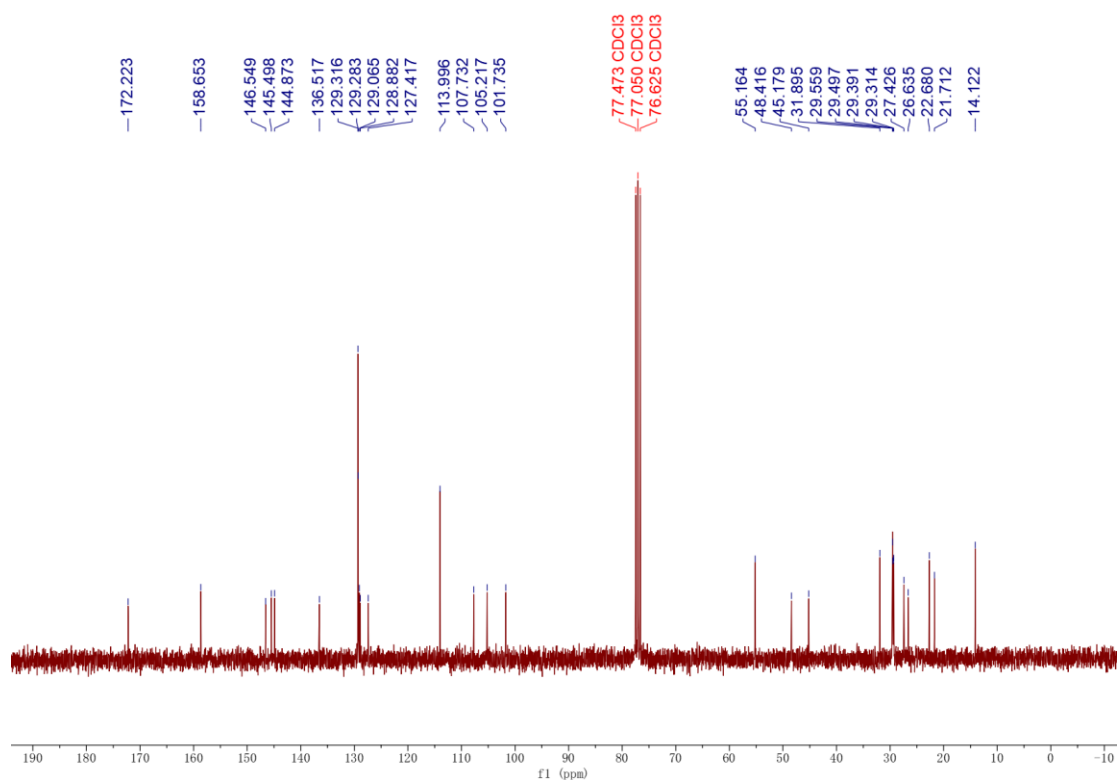

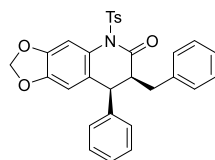

3p

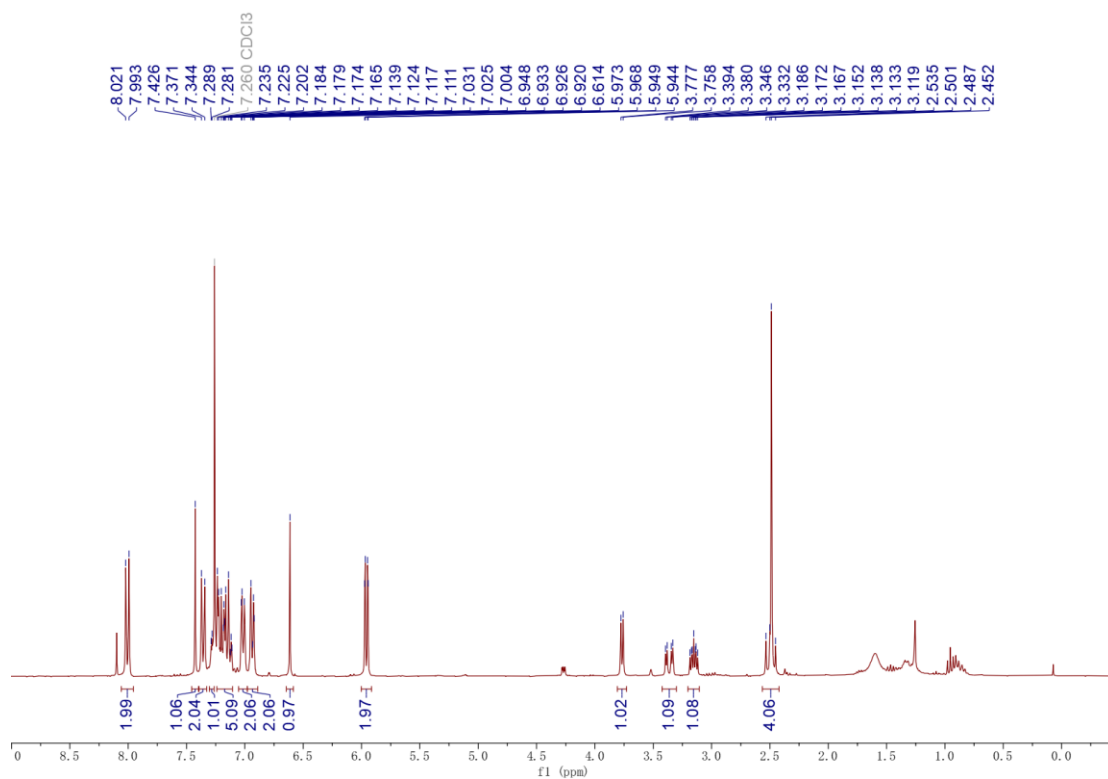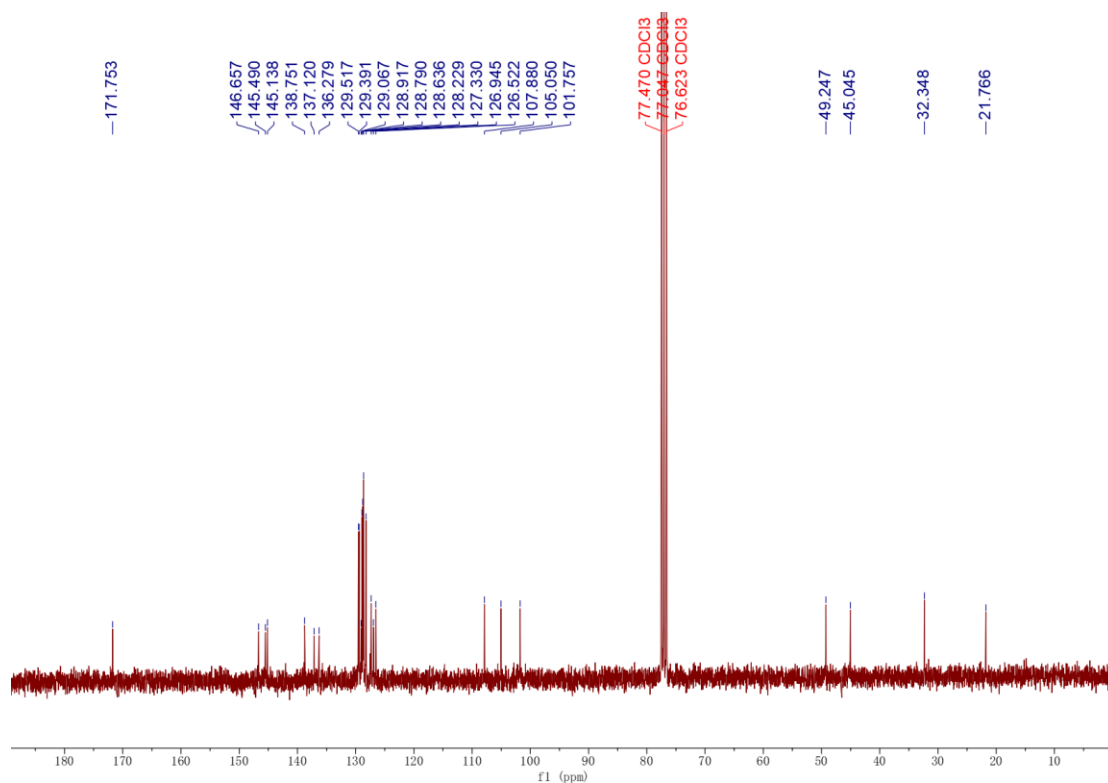

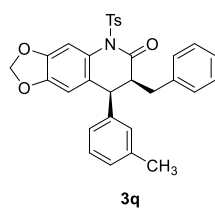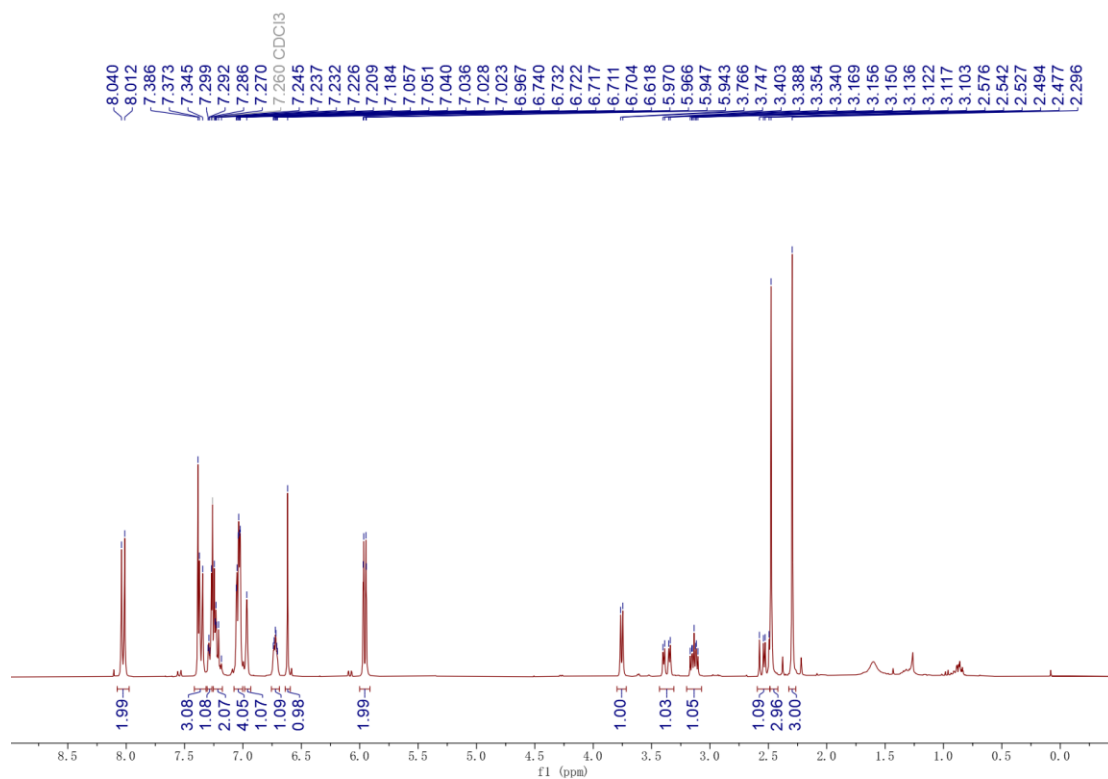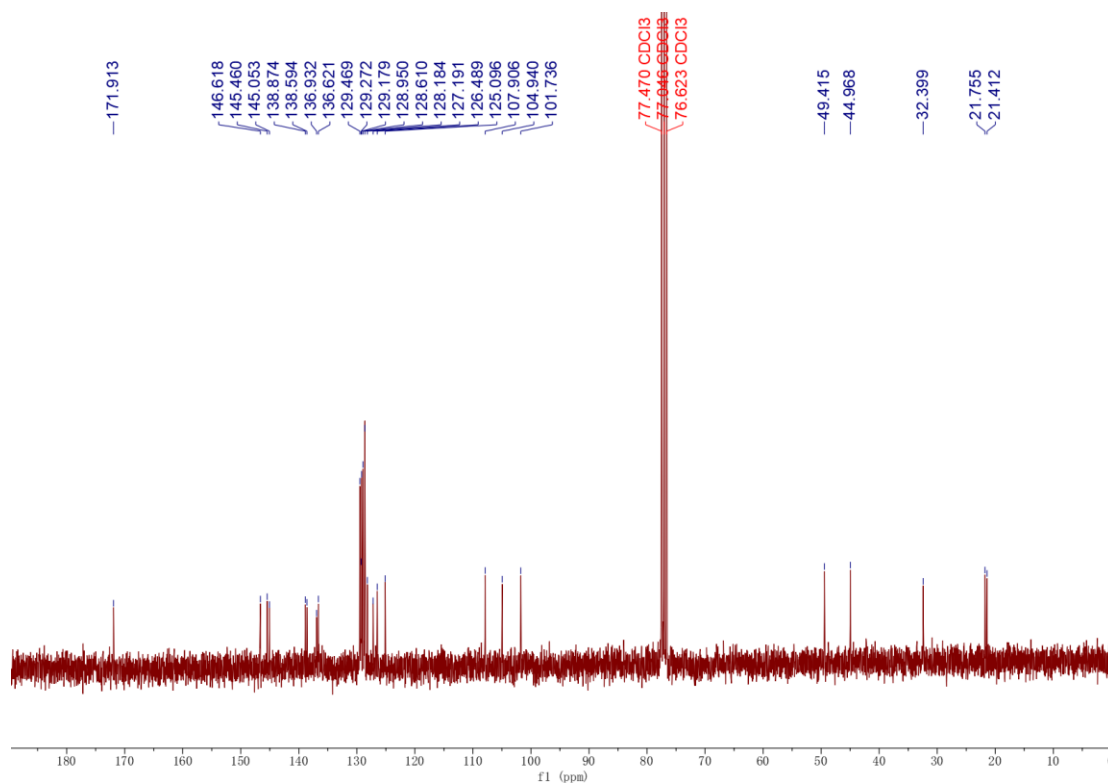

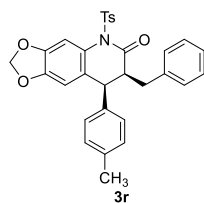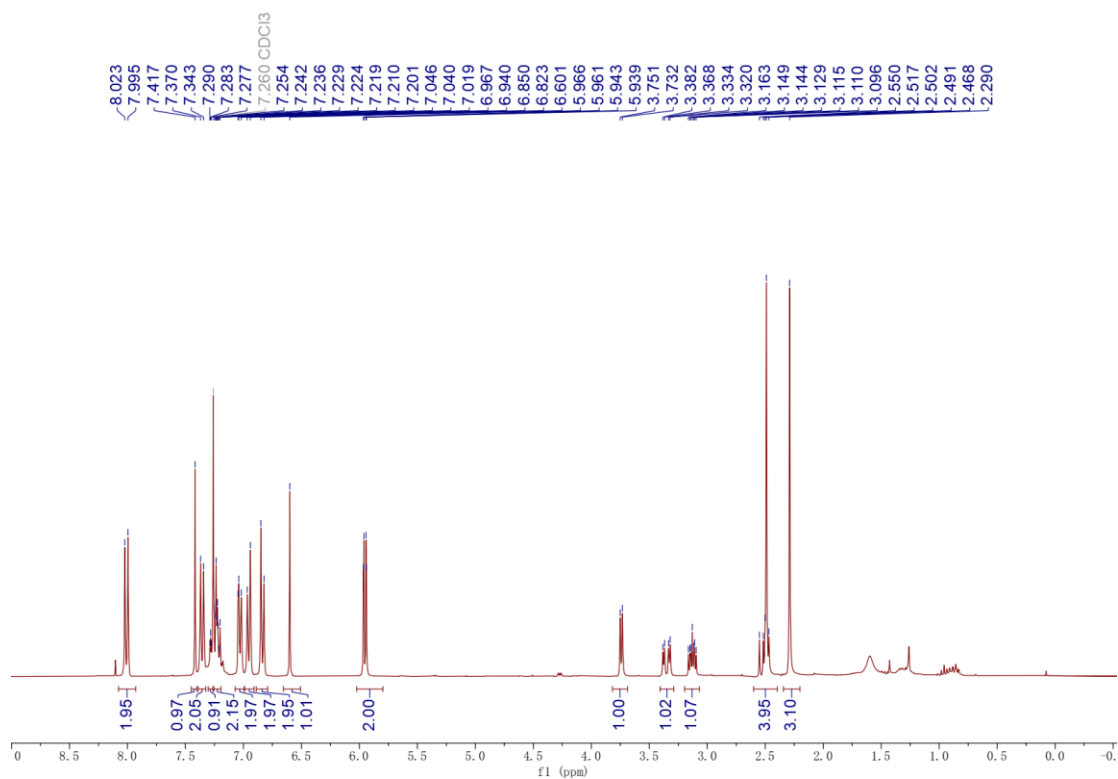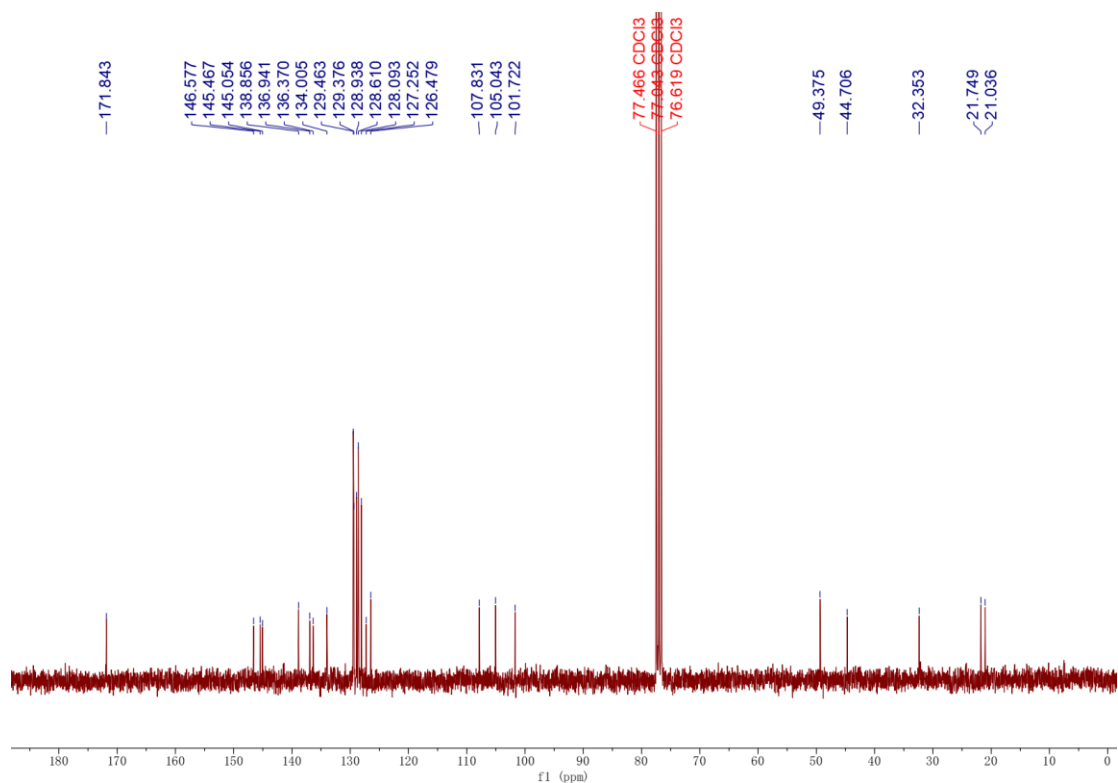

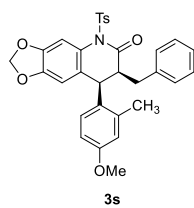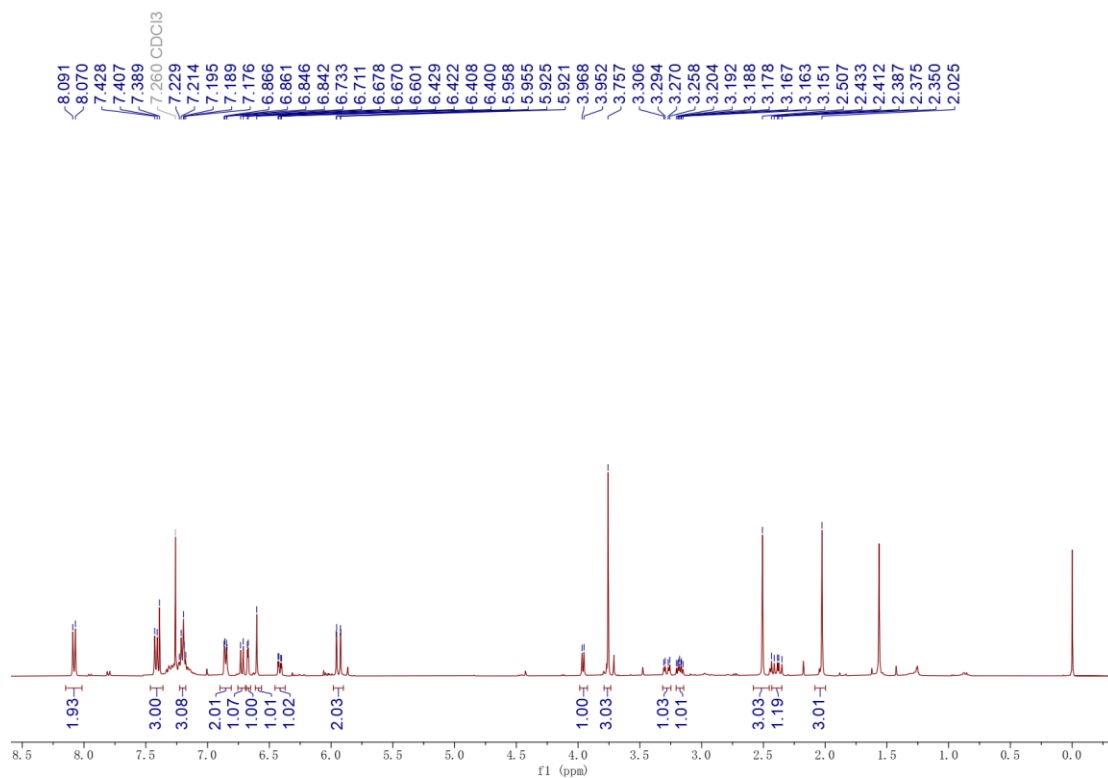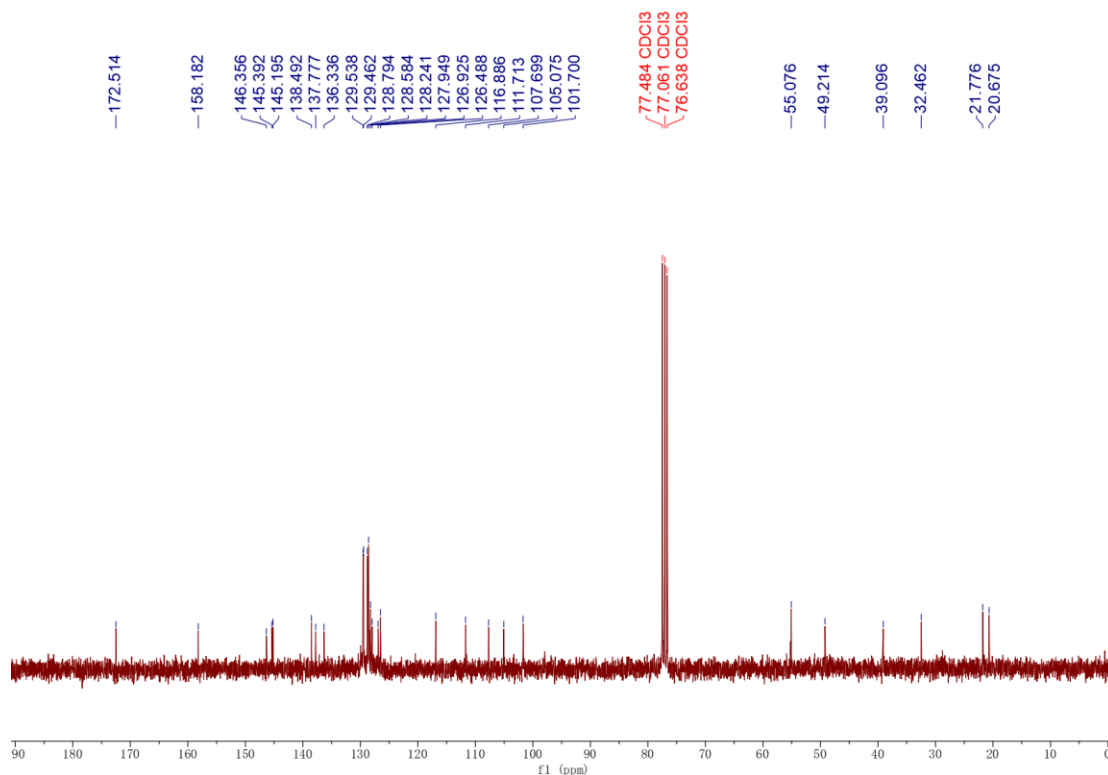

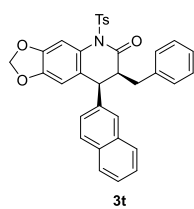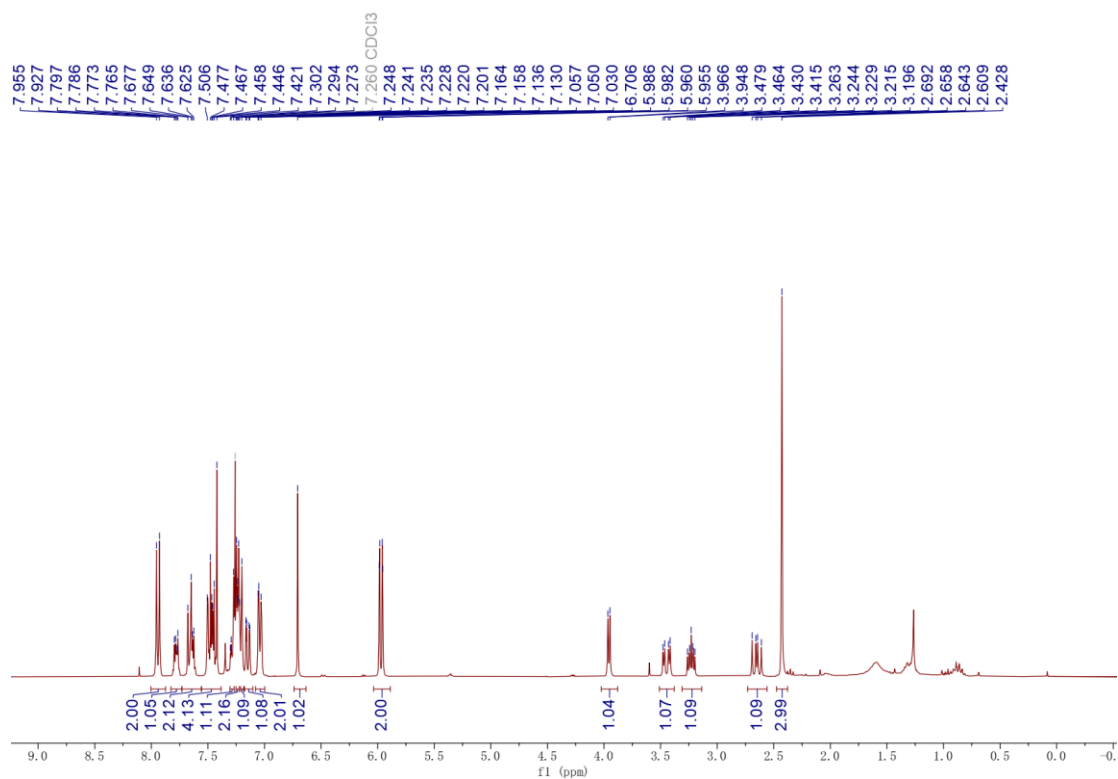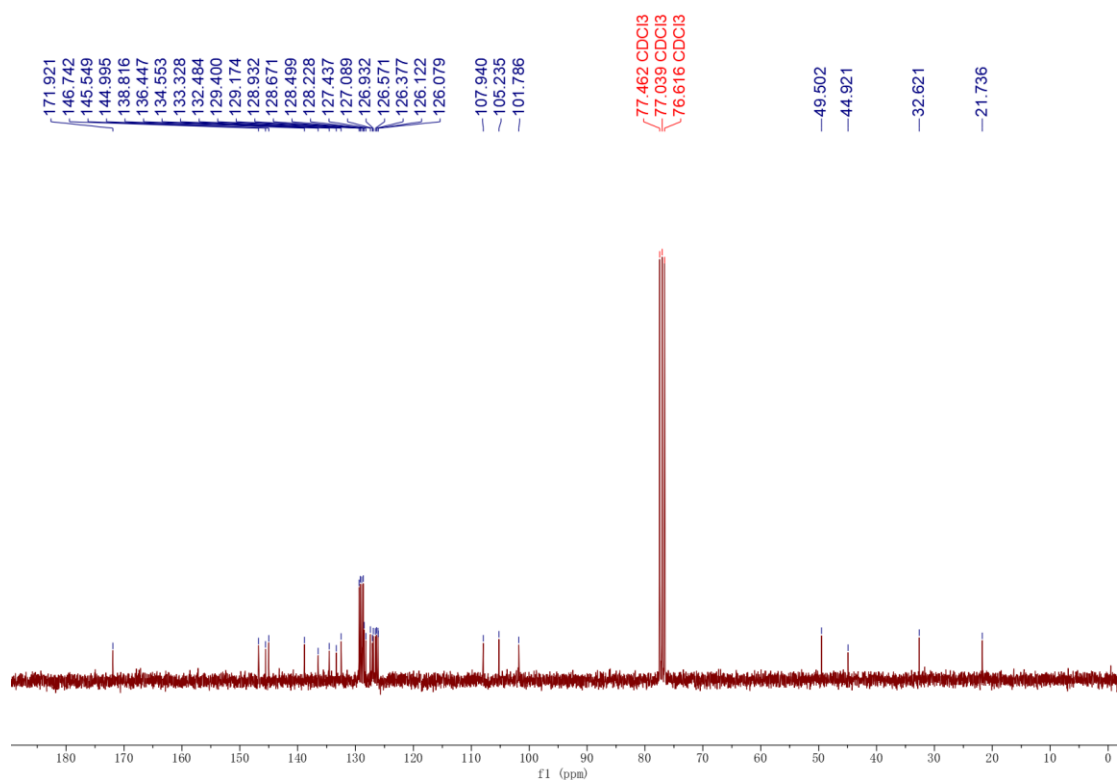

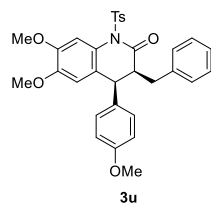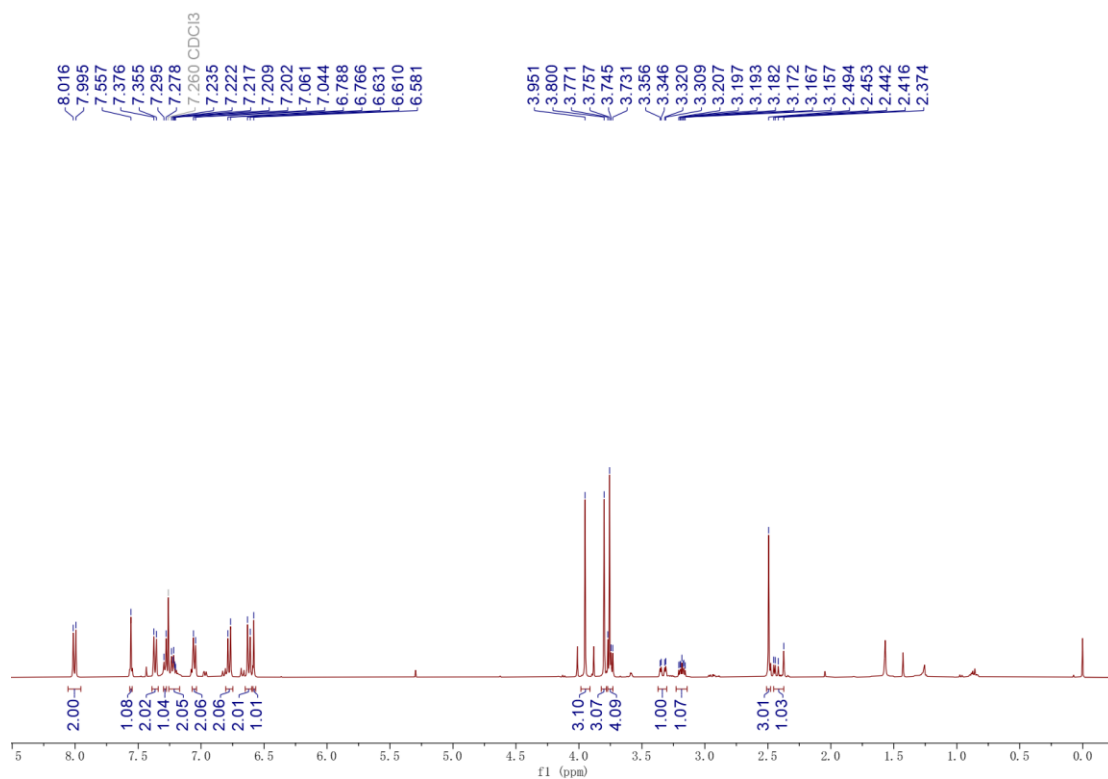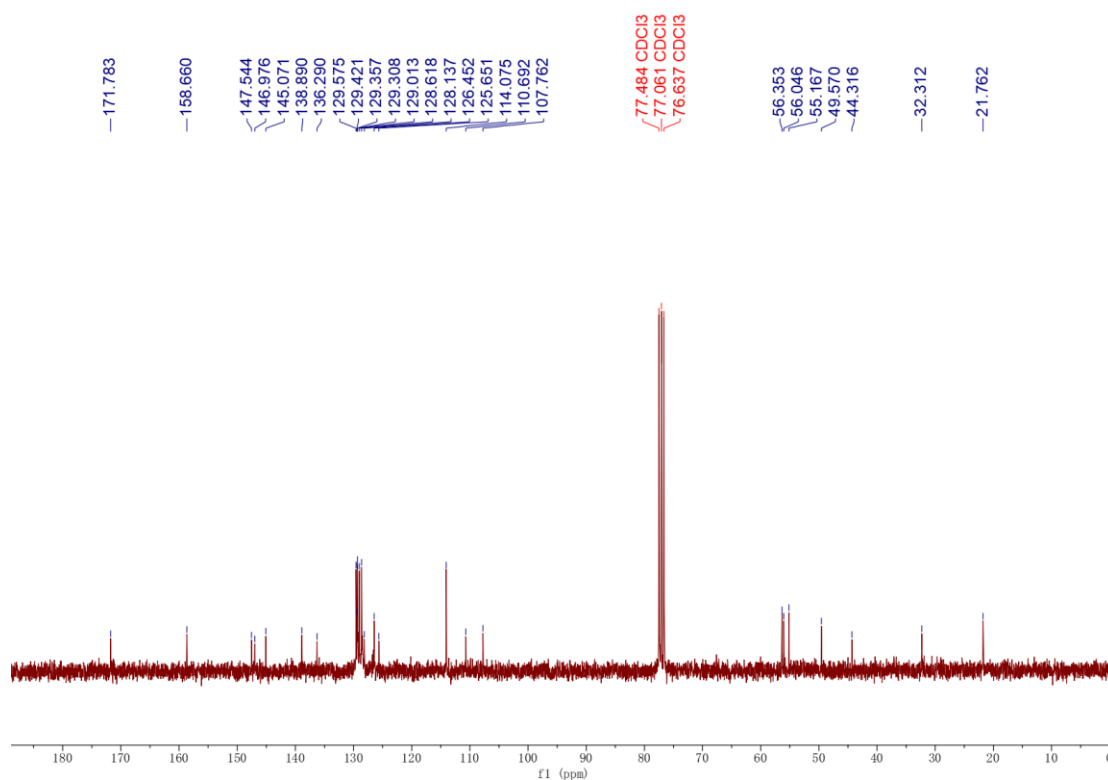

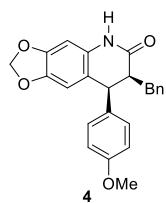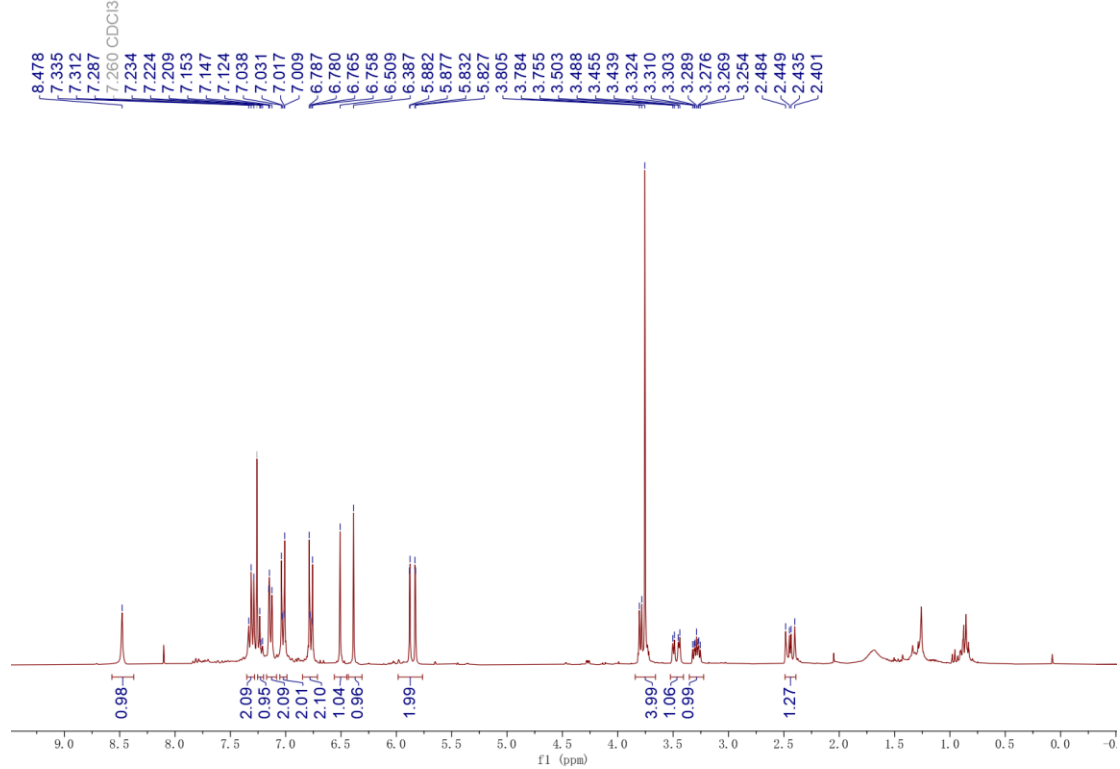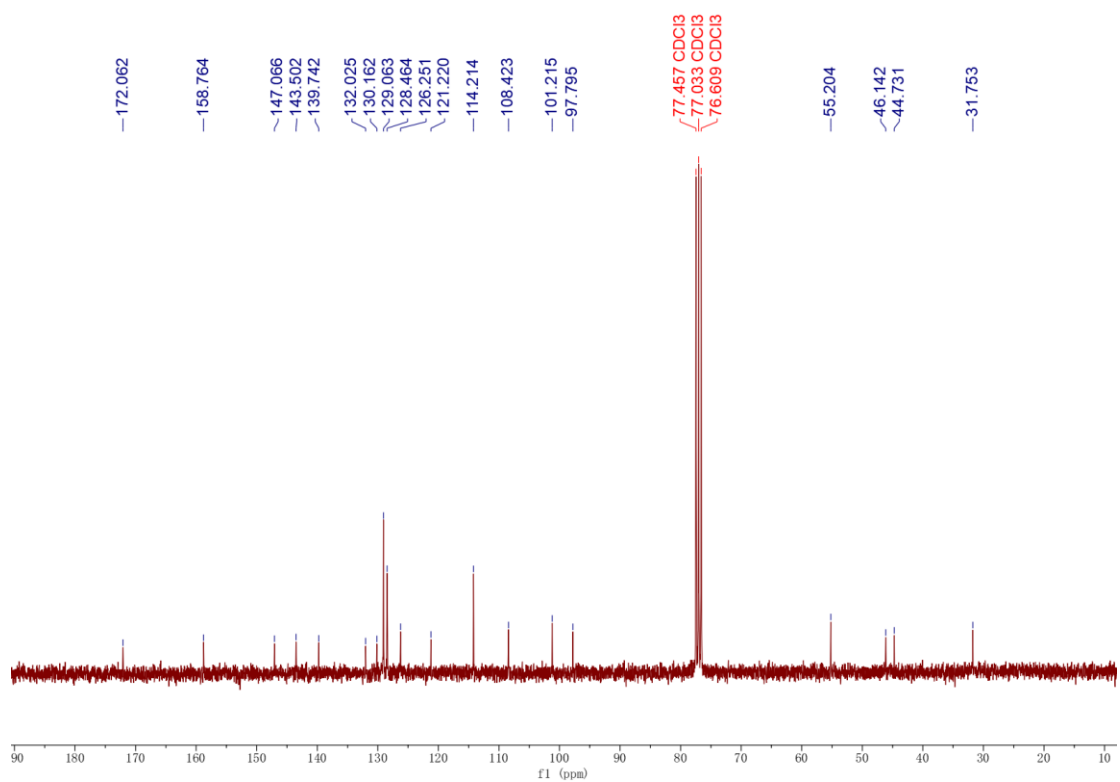

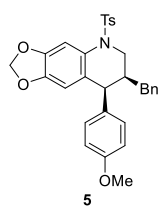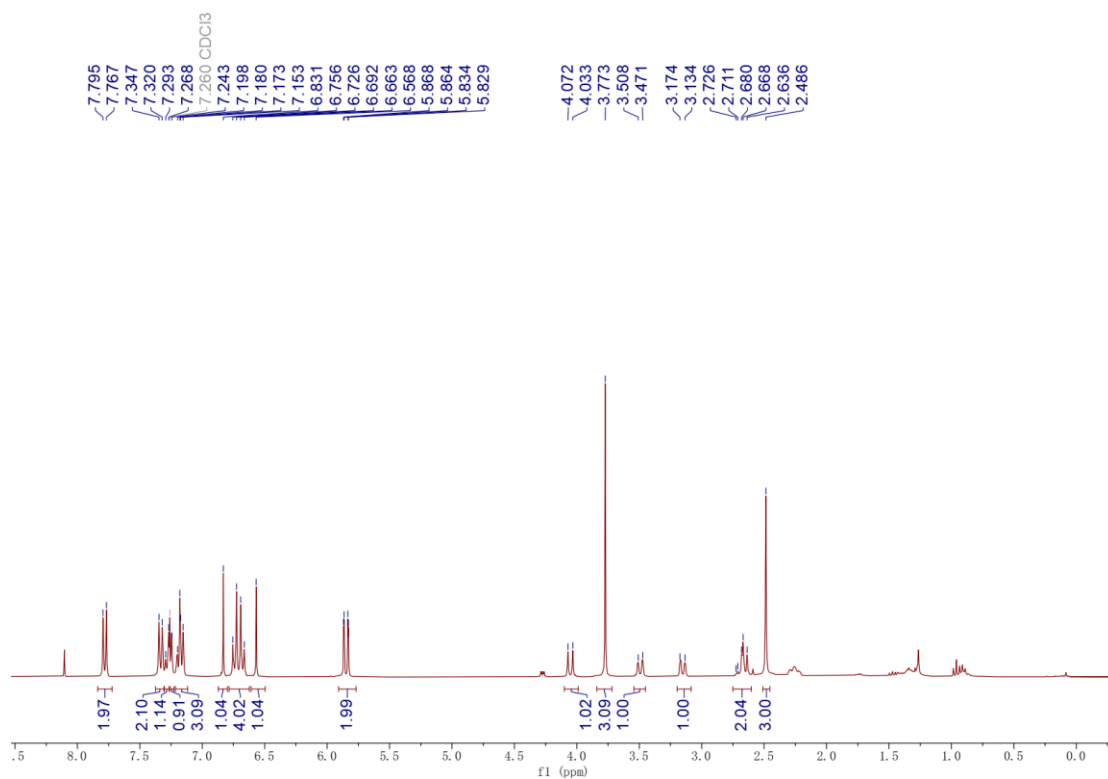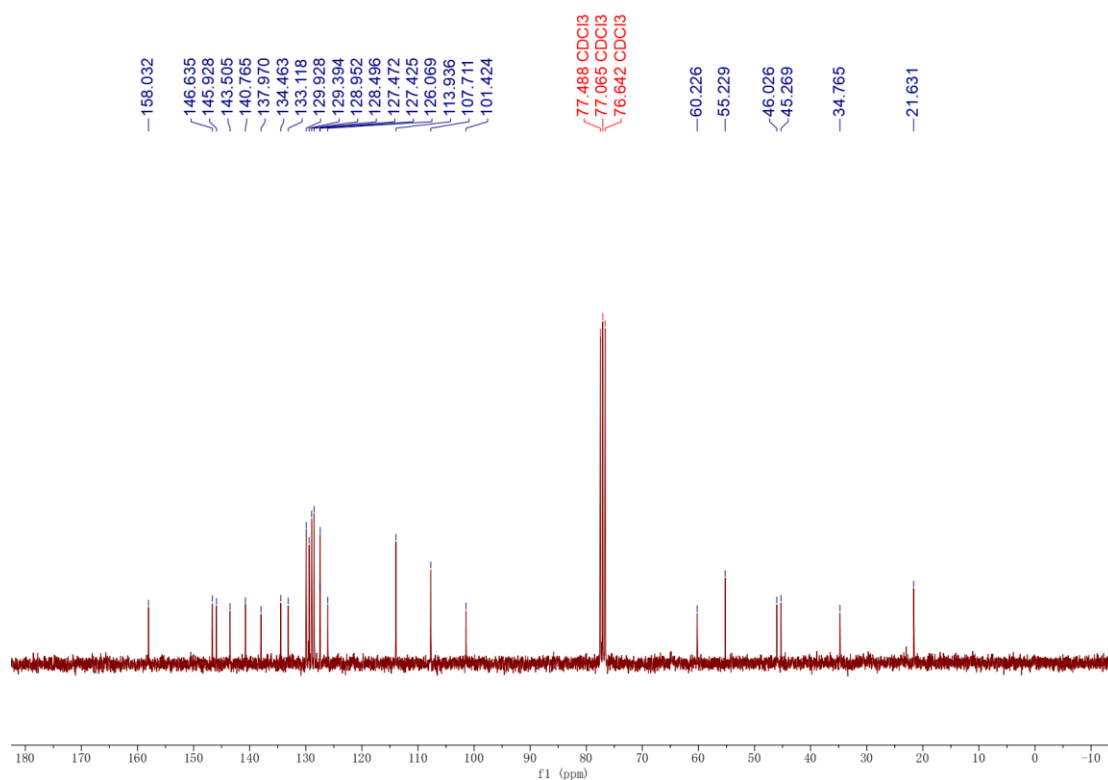

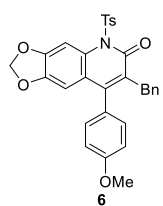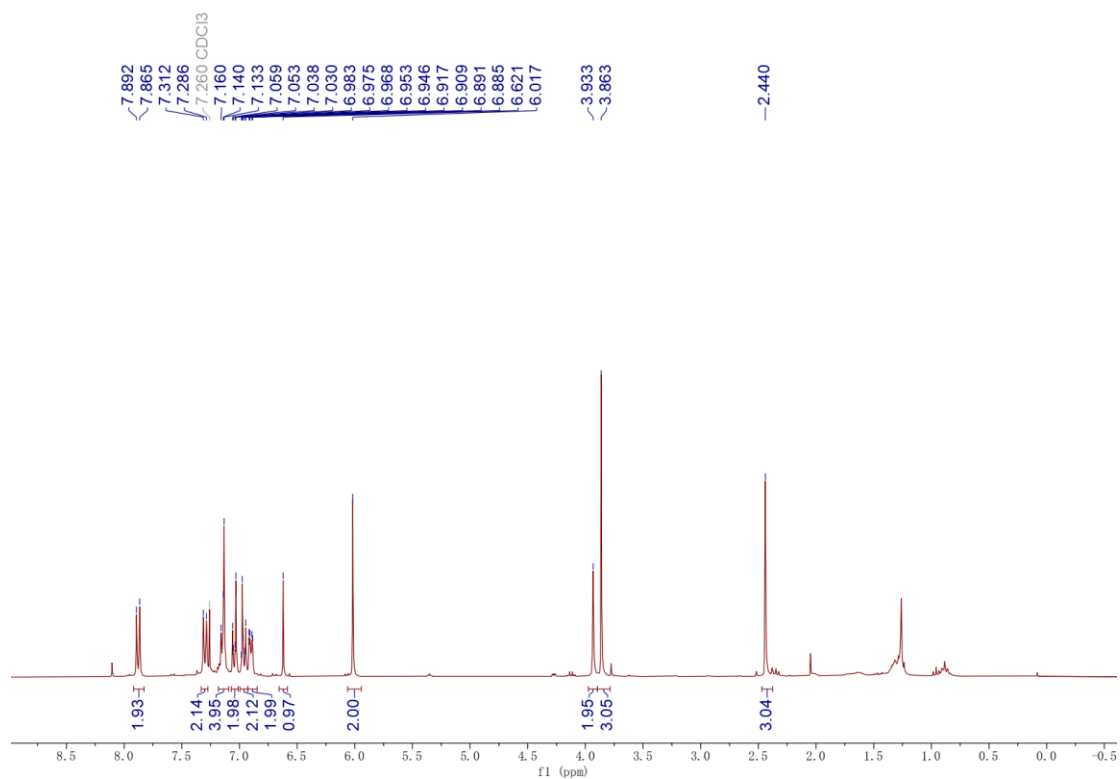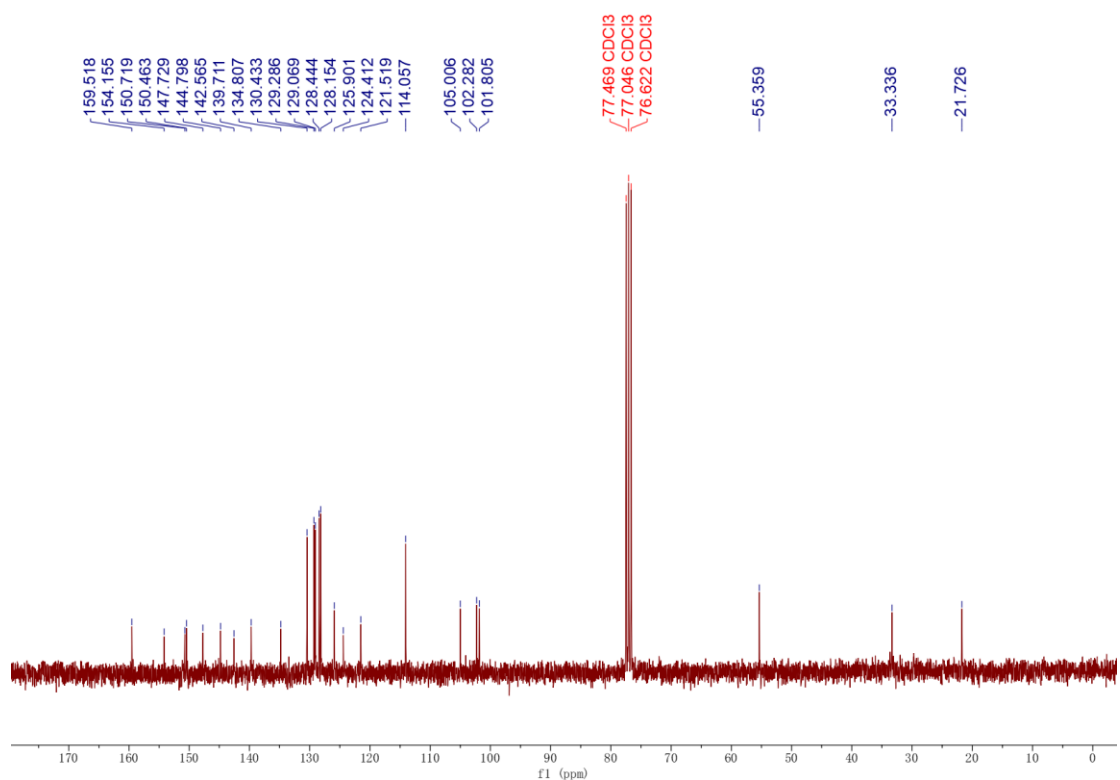

## HPLC spectra of products.

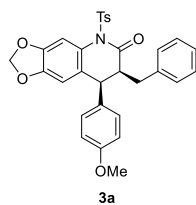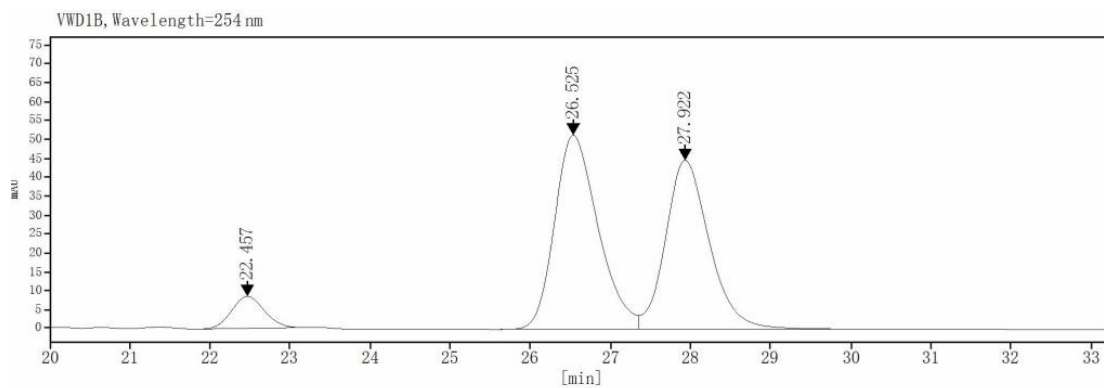

VWD1B, Wavelength=254 nm

| Ret.Time | Area    | Height | Area%  |
|----------|---------|--------|--------|
| 22.457   | 239.91  | 8.46   | 6.17   |
| 26.525   | 1937.15 | 51.32  | 49.86  |
| 27.922   | 1708.21 | 44.67  | 43.97  |
| Total    | 3885.27 | 104.45 | 100.00 |

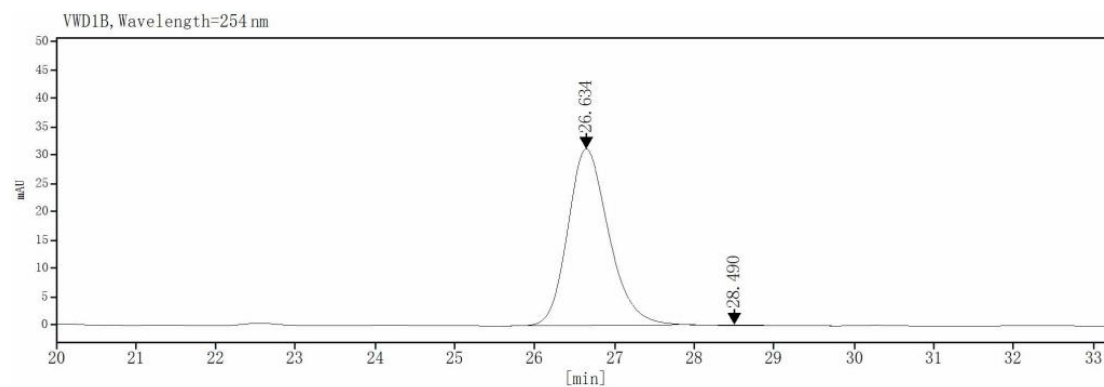

VWD1B, Wavelength=254 nm

| Ret.Time | Area    | Height | Area%  |
|----------|---------|--------|--------|
| 26.634   | 1111.79 | 31.15  | 99.70  |
| 28.490   | 3.32    | 0.08   | 0.30   |
| Total    | 1115.11 | 31.23  | 100.00 |

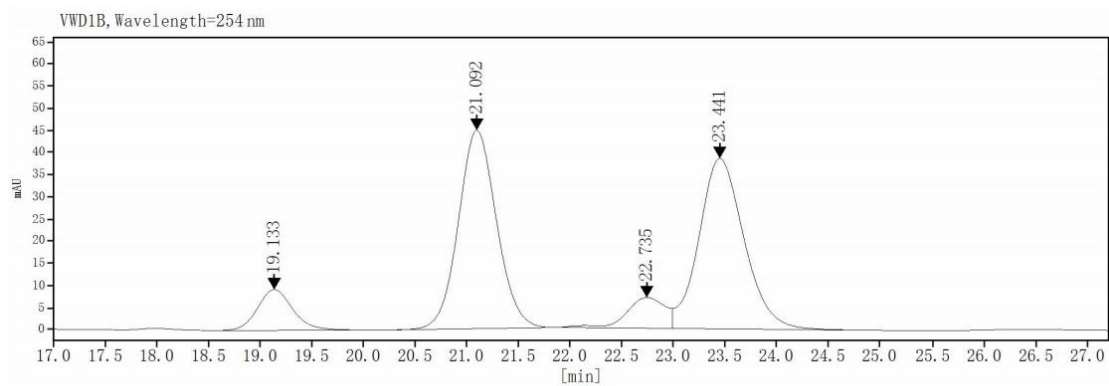

VWD1B, Wavelength=254 nm

| Ret.Time | Area    | Height | Area%  |
|----------|---------|--------|--------|
| 19.133   | 218.87  | 9.22   | 8.06   |
| 21.092   | 1147.68 | 44.77  | 42.26  |
| 22.735   | 179.95  | 6.93   | 6.63   |
| 23.441   | 1169.45 | 38.46  | 43.06  |
| Total    | 2715.94 | 99.37  | 100.00 |

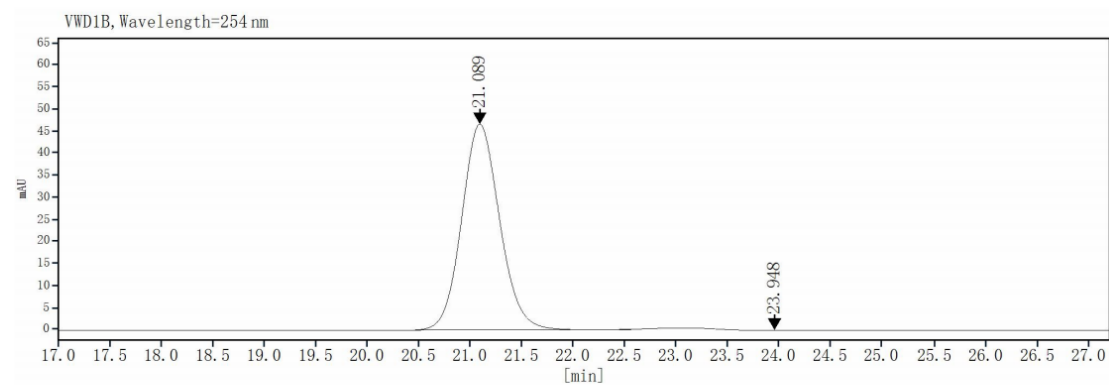

VWD1B, Wavelength=254 nm

| Ret.Time | Area    | Height | Area%  |
|----------|---------|--------|--------|
| 21.089   | 1187.07 | 46.60  | 99.87  |
| 23.948   | 1.49    | 0.05   | 0.13   |
| Total    | 1188.56 | 46.66  | 100.00 |

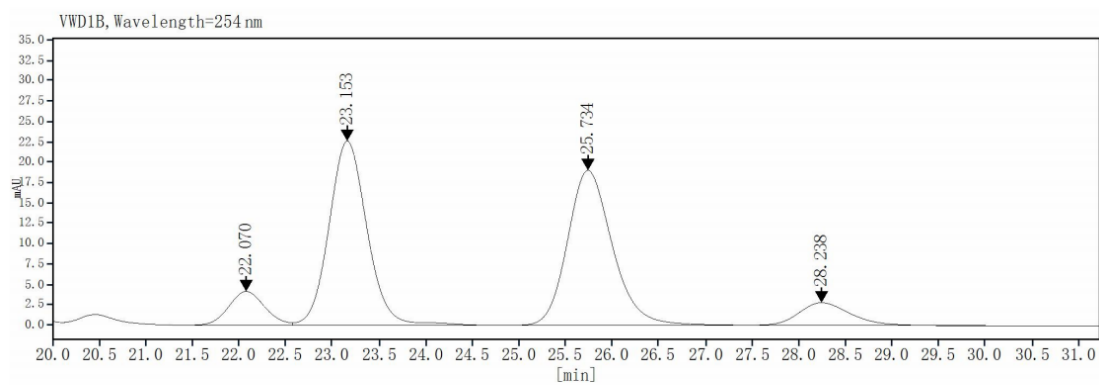

VWD1B, Wavelength=254 nm

| Ret.Time | Area    | Height | Area%  |
|----------|---------|--------|--------|
| 22.070   | 111.21  | 4.15   | 7.45   |
| 23.153   | 641.45  | 22.62  | 42.97  |
| 25.734   | 633.62  | 19.01  | 42.44  |
| 28.238   | 106.61  | 2.78   | 7.14   |
| Total    | 1492.88 | 48.56  | 100.00 |

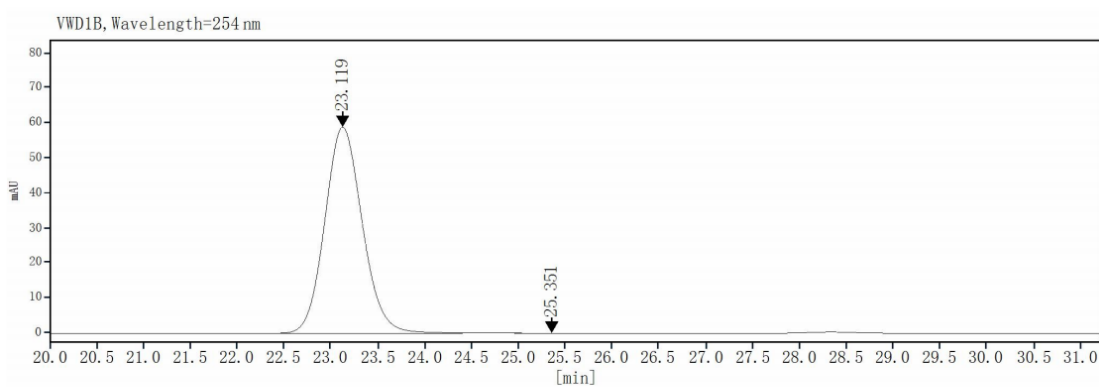

VWD1B, Wavelength=254 nm

| Ret.Time | Area    | Height | Area%  |
|----------|---------|--------|--------|
| 23.119   | 1636.29 | 58.91  | 99.94  |
| 25.351   | 1.06    | 0.02   | 0.06   |
| Total    | 1637.35 | 58.93  | 100.00 |

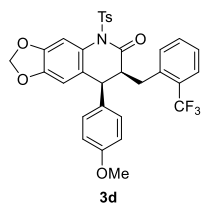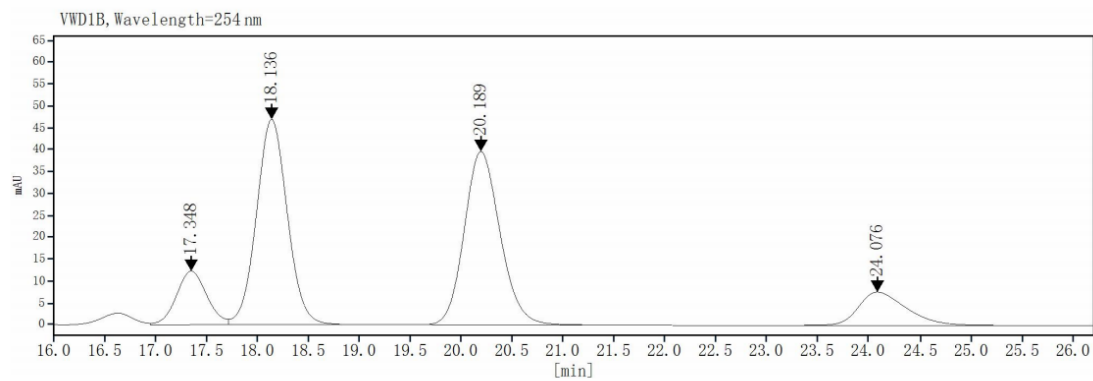

VWD1B, Wavelength=254 nm

| Ret.Time | Area    | Height | Area%  |
|----------|---------|--------|--------|
| 17.348   | 253.61  | 12.27  | 10.32  |
| 18.136   | 988.45  | 46.90  | 40.24  |
| 20.189   | 966.80  | 39.61  | 39.36  |
| 24.076   | 247.42  | 7.60   | 10.07  |
| Total    | 2456.28 | 106.39 | 100.00 |

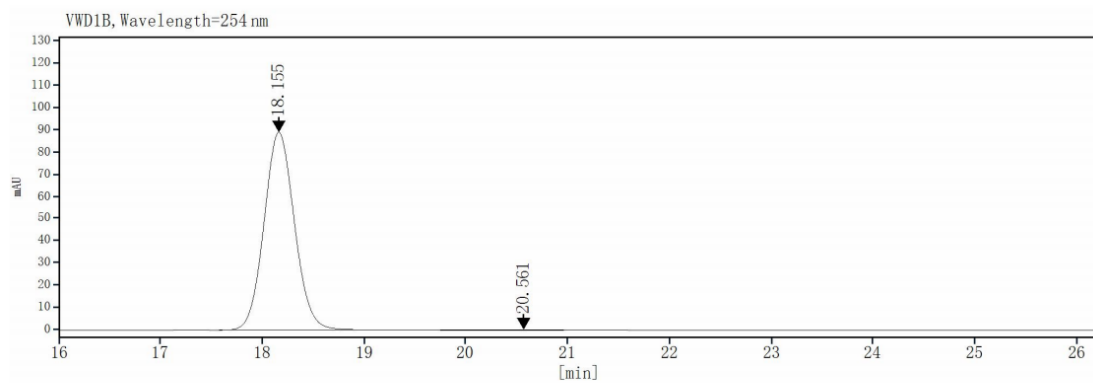

VWD1B, Wavelength=254 nm

| Ret.Time | Area    | Height | Area%  |
|----------|---------|--------|--------|
| 18.155   | 1851.27 | 89.24  | 99.58  |
| 20.561   | 7.74    | 0.13   | 0.42   |
| Total    | 1859.01 | 89.37  | 100.00 |

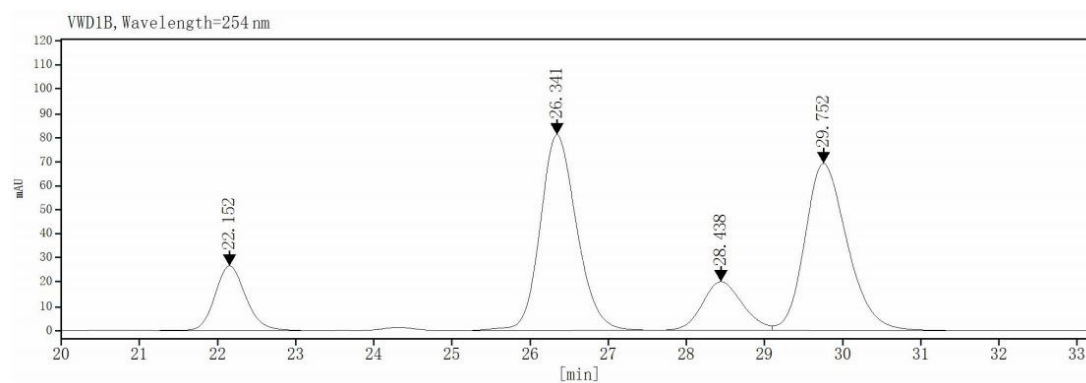

VWD1B, Wavelength=254 nm

| Ret.Time | Area    | Height | Area%  |
|----------|---------|--------|--------|
| 22.152   | 733.70  | 26.85  | 10.94  |
| 26.341   | 2636.78 | 81.24  | 39.32  |
| 28.438   | 719.08  | 20.17  | 10.72  |
| 29.752   | 2616.77 | 69.32  | 39.02  |
| Total    | 6706.32 | 197.59 | 100.00 |

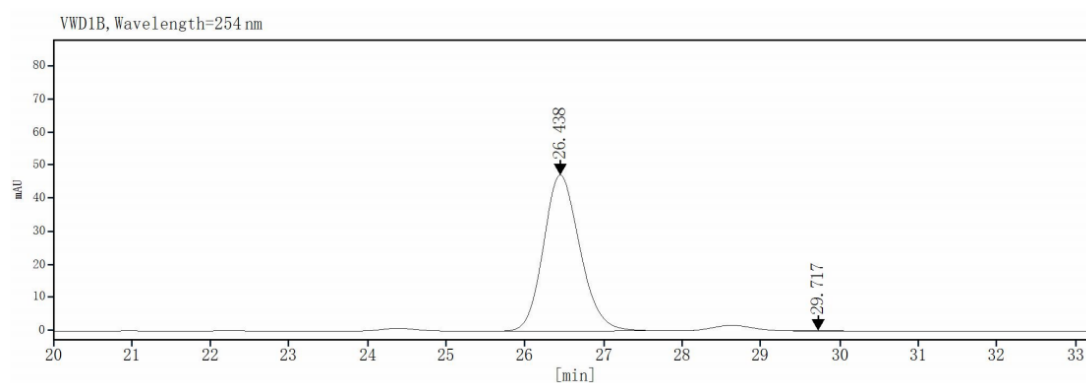

VWD1B, Wavelength=254 nm

| Ret.Time | Area    | Height | Area%  |
|----------|---------|--------|--------|
| 26.438   | 1521.57 | 47.20  | 99.60  |
| 29.717   | 6.04    | 0.08   | 0.40   |
| Total    | 1527.61 | 47.28  | 100.00 |

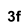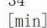

VWD1B, Wavelength=254 nm

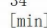

VWD1B,Wavelength=254 nm

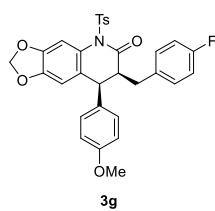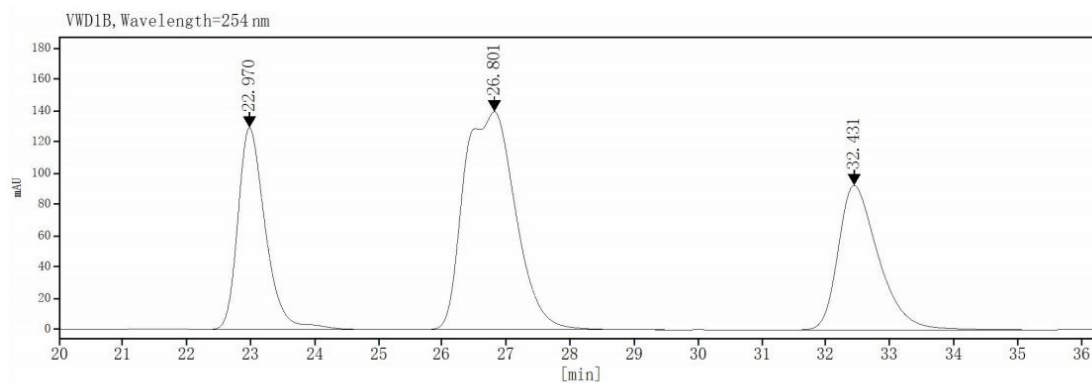

VWD1B, Wavelength=254 nm

| Ret.Time | Area     | Height | Area%  |
|----------|----------|--------|--------|
| 22.970   | 3852.78  | 128.96 | 24.59  |
| 26.801   | 7786.16  | 139.19 | 49.70  |
| 32.431   | 4027.86  | 92.34  | 25.71  |
| Total    | 15666.81 | 360.48 | 100.00 |

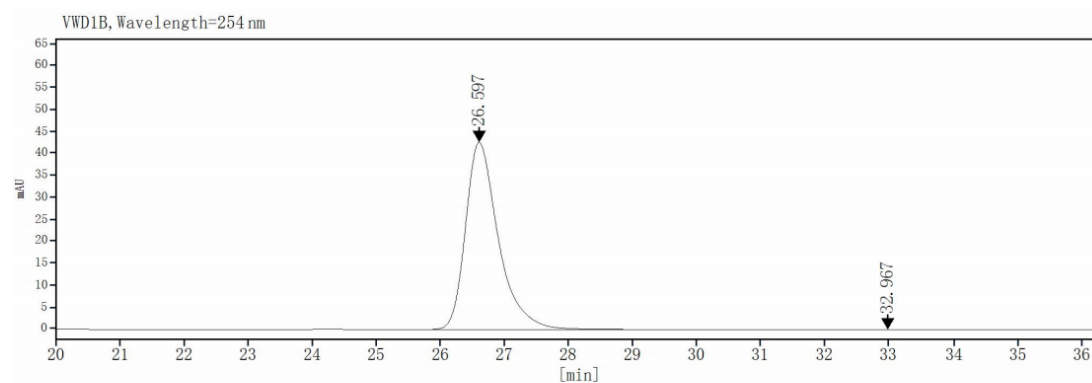

VWD1B, Wavelength=254 nm

| Ret.Time | Area    | Height | Area%  |
|----------|---------|--------|--------|
| 26.597   | 1517.25 | 42.61  | 99.98  |
| 32.967   | 0.25    | 0.01   | 0.02   |
| Total    | 1517.50 | 42.62  | 100.00 |

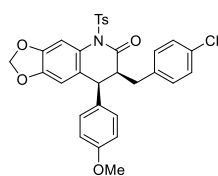

3h

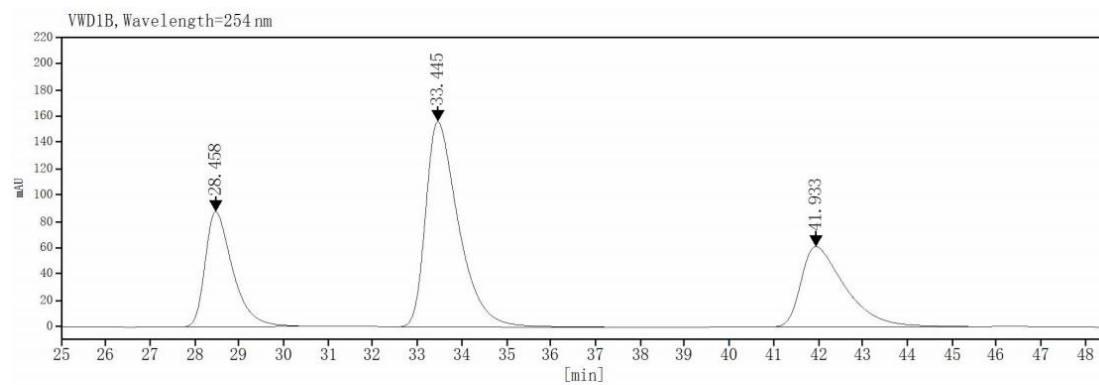

VWD1B, Wavelength=254 nm

| Ret.Time | Area     | Height | Area%  |
|----------|----------|--------|--------|
| 28.458   | 3763.78  | 87.51  | 23.57  |
| 33.445   | 8020.53  | 156.20 | 50.24  |
| 41.933   | 4181.08  | 60.92  | 26.19  |
| Total    | 15965.39 | 304.64 | 100.00 |

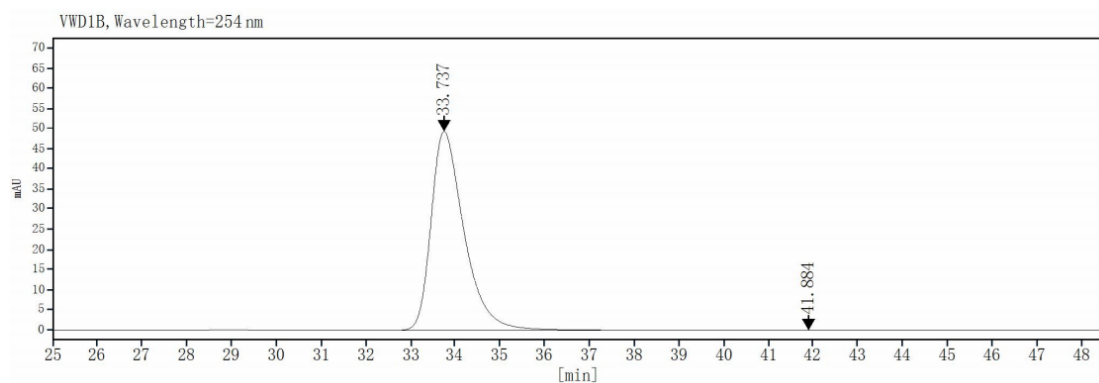

VWD1B, Wavelength=254 nm

| Ret.Time | Area    | Height | Area%  |
|----------|---------|--------|--------|
| 33.737   | 2542.97 | 49.56  | 99.91  |
| 41.884   | 2.19    | 0.02   | 0.09   |
| Total    | 2545.16 | 49.57  | 100.00 |

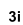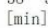

VWD1B, Wavelength=254 nm

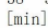

VWD1B, Wavelength=254 nm

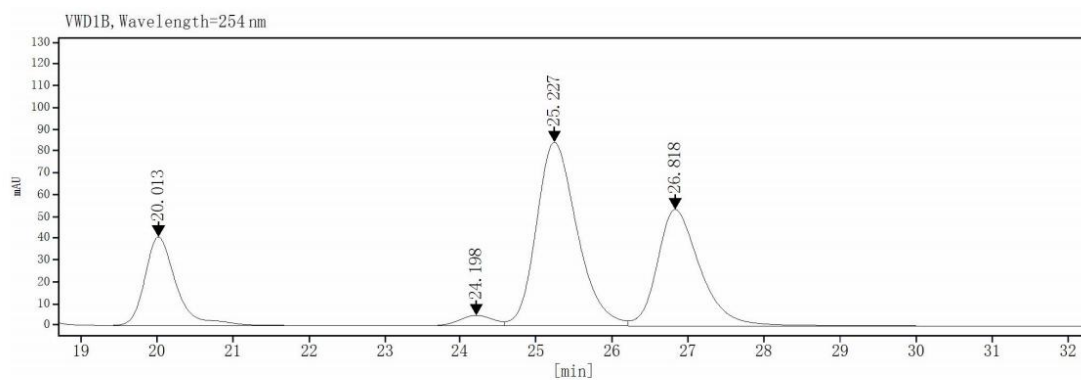

VWD1B, Wavelength=254 nm

| Ret.Time | Area    | Height | Area%  |
|----------|---------|--------|--------|
| 20.013   | 1166.14 | 40.62  | 17.83  |
| 24.198   | 147.65  | 4.78   | 2.26   |
| 25.227   | 3131.64 | 84.25  | 47.89  |
| 26.818   | 2093.31 | 53.37  | 32.01  |
| Total    | 6538.74 | 183.03 | 100.00 |

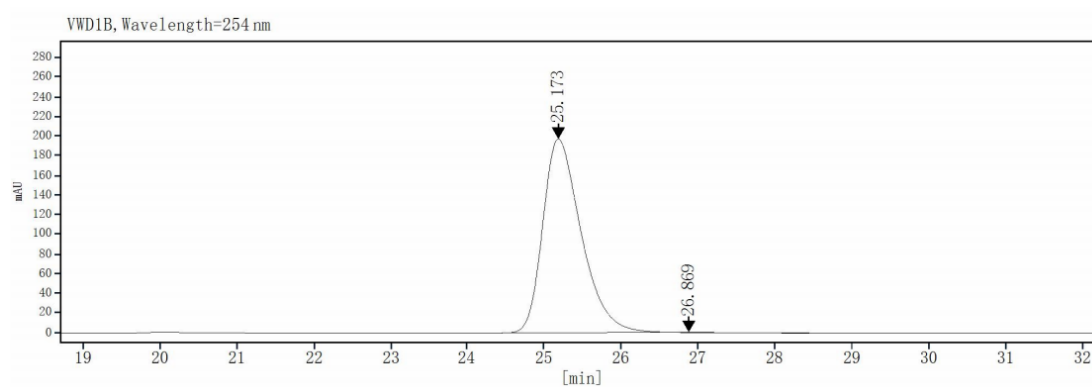

VWD1B, Wavelength=254 nm

| Ret.Time | Area    | Height | Area%  |
|----------|---------|--------|--------|
| 25.173   | 6840.25 | 197.49 | 99.78  |
| 26.869   | 14.94   | 0.26   | 0.22   |
| Total    | 6855.19 | 197.75 | 100.00 |

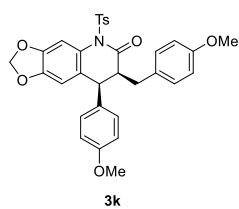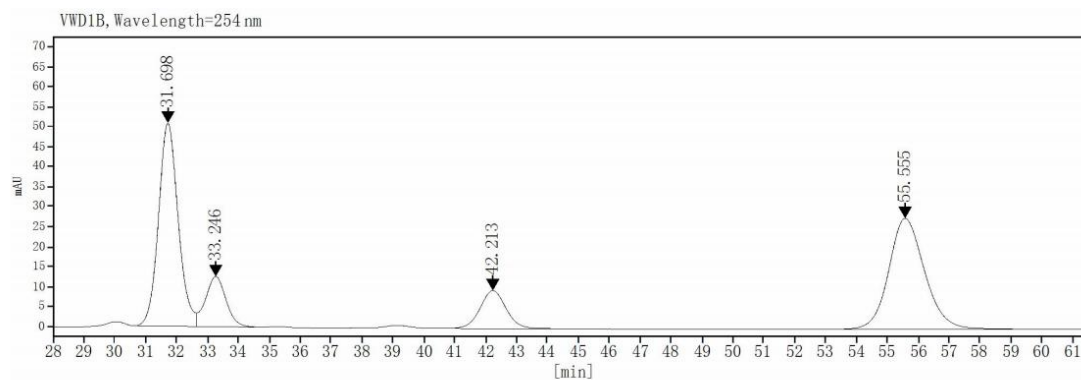

VWD1B, Wavelength=254 nm

| Ret.Time | Area    | Height | Area%  |
|----------|---------|--------|--------|
| 31.698   | 2249.86 | 50.93  | 39.89  |
| 33.246   | 580.05  | 12.59  | 10.28  |
| 42.213   | 563.48  | 9.54   | 9.99   |
| 55.555   | 2247.01 | 27.83  | 39.84  |
| Total    | 5640.40 | 100.89 | 100.00 |

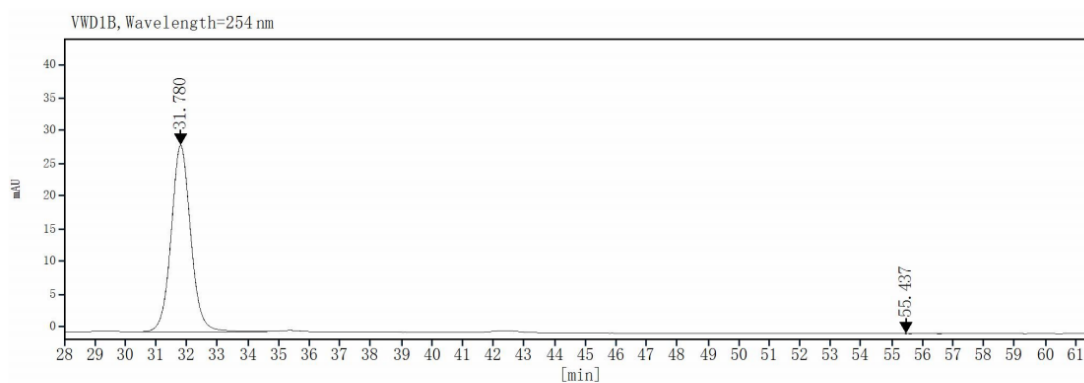

VWD1B, Wavelength=254 nm

| Ret.Time | Area    | Height | Area%  |
|----------|---------|--------|--------|
| 31.780   | 1260.75 | 28.53  | 99.93  |
| 55.437   | 0.90    | 0.01   | 0.07   |
| Total    | 1261.65 | 28.54  | 100.00 |

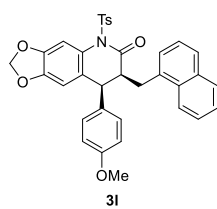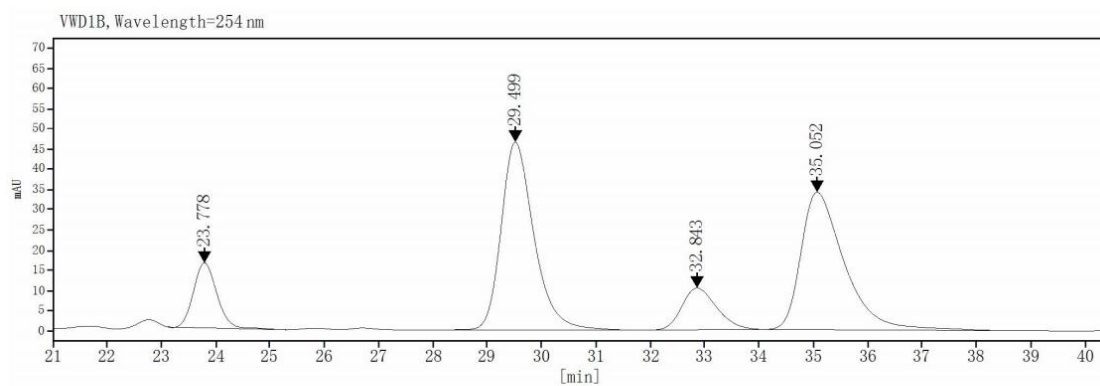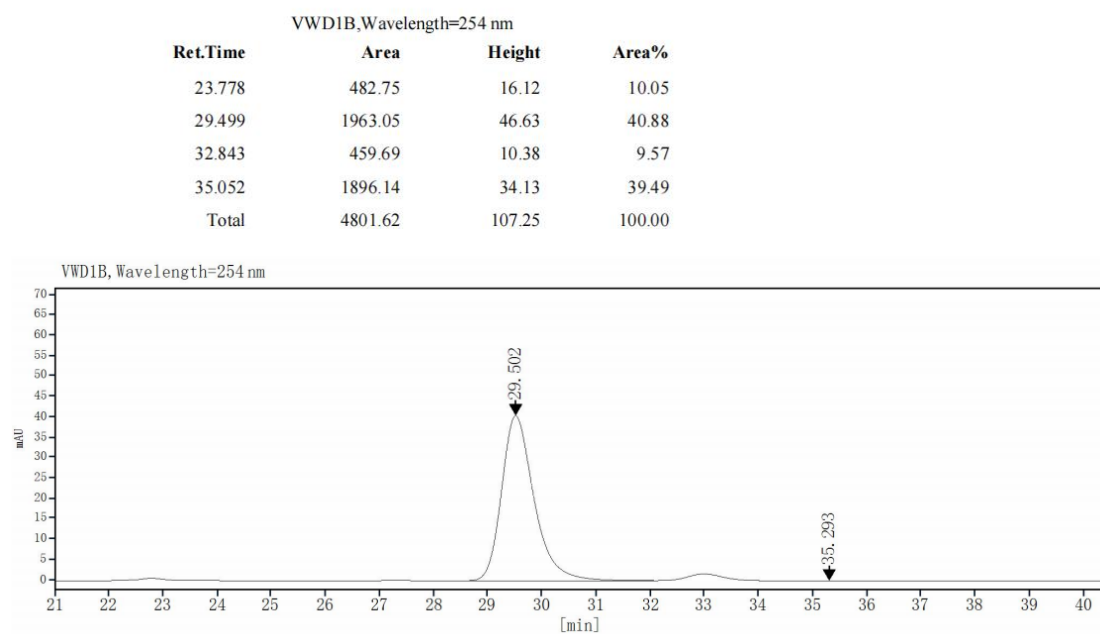

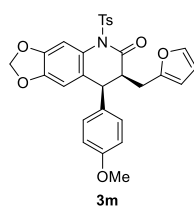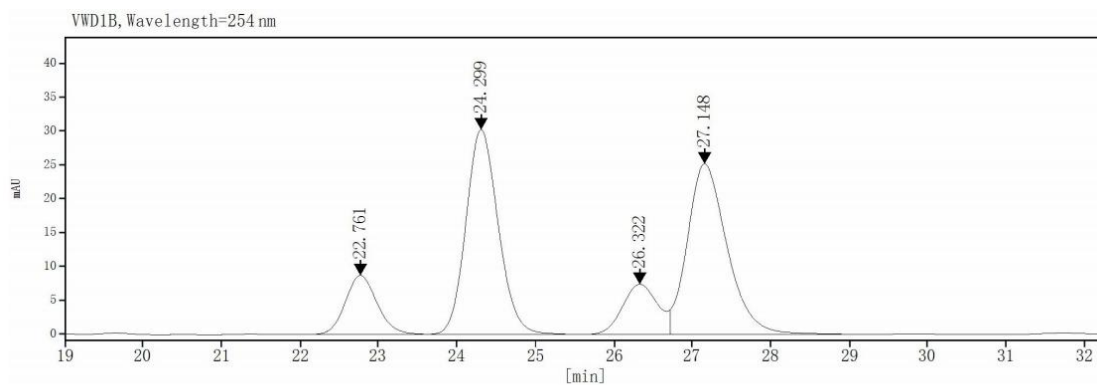

VWD1B, Wavelength=254 nm

| Ret.Time | Area    | Height | Area%  |
|----------|---------|--------|--------|
| 22.761   | 243.19  | 8.71   | 10.92  |
| 24.299   | 866.75  | 30.28  | 38.93  |
| 26.322   | 232.95  | 7.40   | 10.46  |
| 27.148   | 883.46  | 25.18  | 39.68  |
| Total    | 2226.35 | 71.57  | 100.00 |

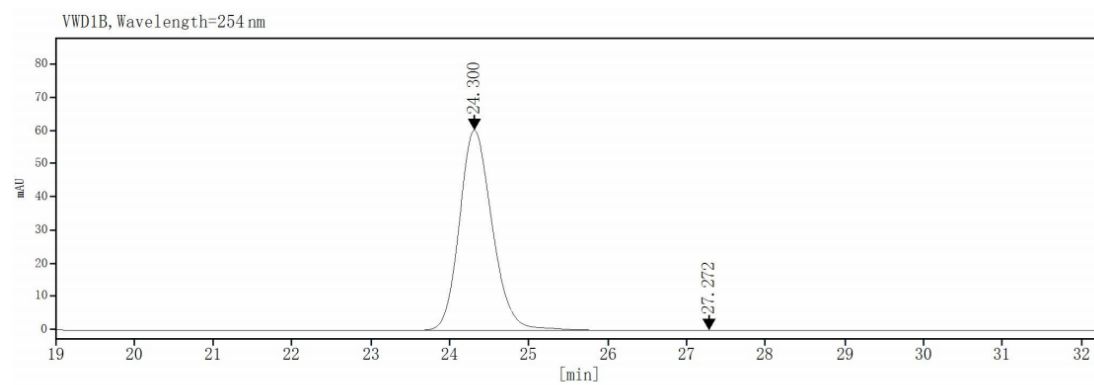

VWD1B, Wavelength=254 nm

| Ret.Time | Area    | Height | Area%  |
|----------|---------|--------|--------|
| 24.300   | 1741.05 | 60.37  | 99.96  |
| 27.272   | 0.76    | 0.03   | 0.04   |
| Total    | 1741.81 | 60.40  | 100.00 |

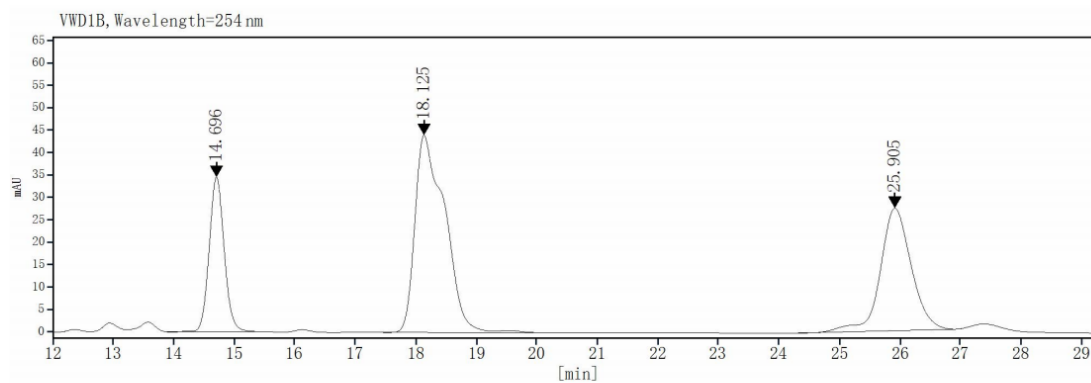

VWD1B, Wavelength=254 nm

| Ret.Time | Area    | Height | Area%  |
|----------|---------|--------|--------|
| 14.696   | 593.02  | 34.50  | 19.25  |
| 18.125   | 1516.61 | 44.05  | 49.23  |
| 25.905   | 971.00  | 27.37  | 31.52  |
| Total    | 3080.63 | 105.91 | 100.00 |

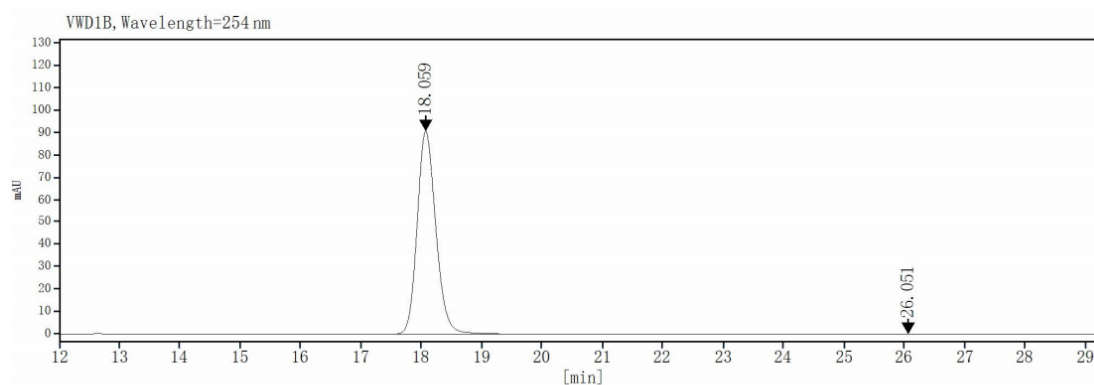

VWD1B, Wavelength=254 nm

| Ret.Time | Area    | Height | Area%  |
|----------|---------|--------|--------|
| 18.059   | 1957.27 | 90.97  | 99.99  |
| 26.051   | 0.12    | 0.01   | 0.01   |
| Total    | 1957.39 | 90.99  | 100.00 |

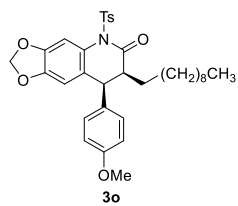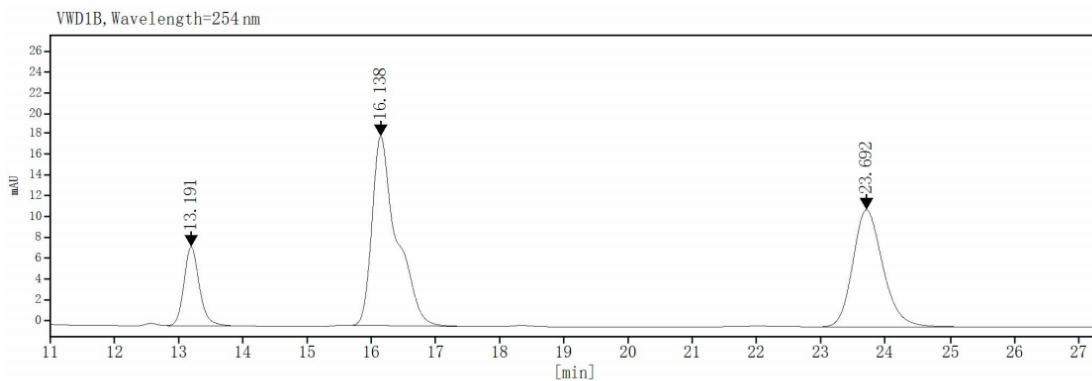

VWD1B, Wavelength=254 nm

| Ret.Time | Area   | Height | Area%  |
|----------|--------|--------|--------|
| 13.191   | 127.49 | 7.65   | 12.97  |
| 16.138   | 487.69 | 18.29  | 49.62  |
| 23.692   | 367.60 | 11.31  | 37.40  |
| Total    | 982.78 | 37.24  | 100.00 |

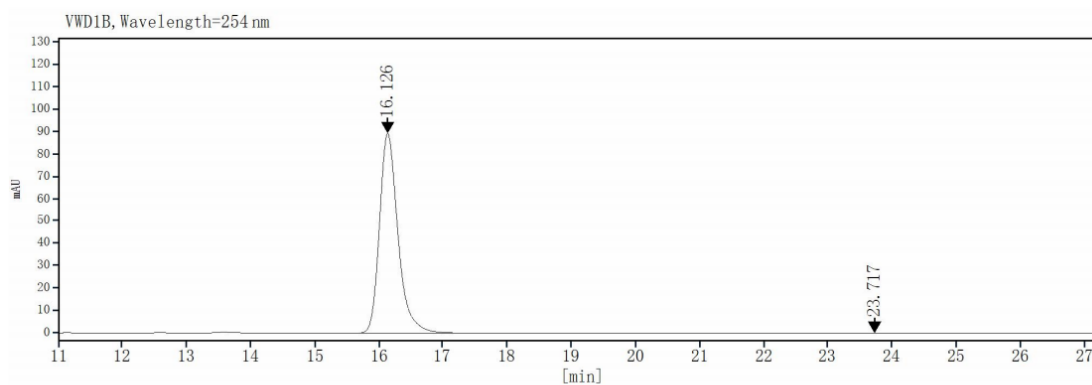

VWD1B, Wavelength=254 nm

| Ret.Time | Area    | Height | Area%  |
|----------|---------|--------|--------|
| 16.126   | 1792.50 | 89.54  | 99.94  |
| 23.717   | 1.11    | 0.03   | 0.06   |
| Total    | 1793.61 | 89.57  | 100.00 |

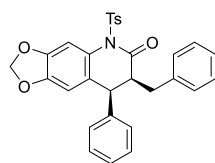

**3p**

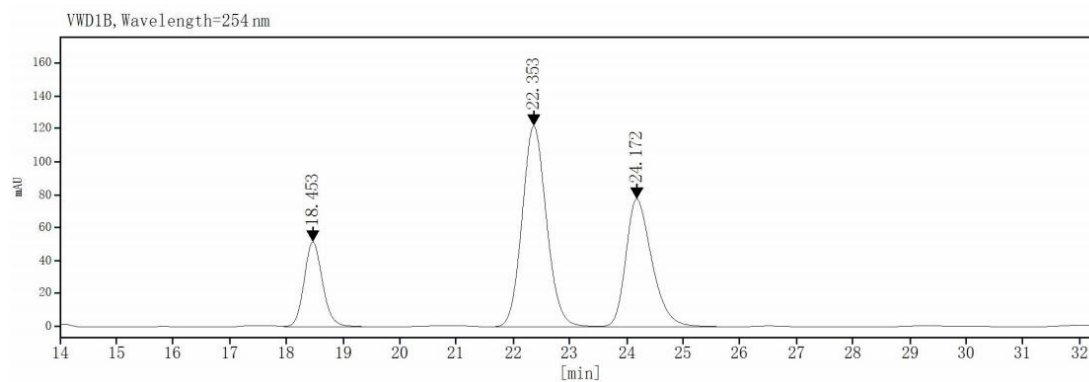

VWD1B, Wavelength=254 nm

| Ret.Time | Area    | Height | Area%  |
|----------|---------|--------|--------|
| 18.453   | 1171.16 | 51.67  | 16.03  |
| 22.353   | 3653.48 | 122.04 | 49.99  |
| 24.172   | 2483.09 | 77.58  | 33.98  |
| Total    | 7307.73 | 251.29 | 100.00 |

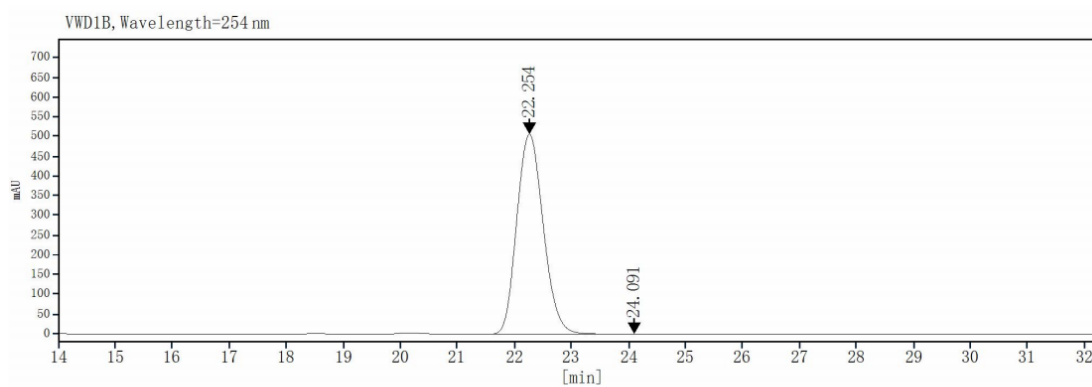

VWD1B, Wavelength=254 nm

| Ret.Time | Area     | Height | Area%  |
|----------|----------|--------|--------|
| 22.254   | 16361.27 | 507.48 | 99.85  |
| 24.091   | 24.79    | 0.30   | 0.15   |
| Total    | 16386.07 | 507.78 | 100.00 |

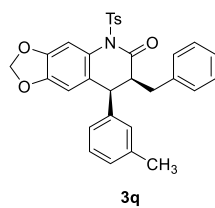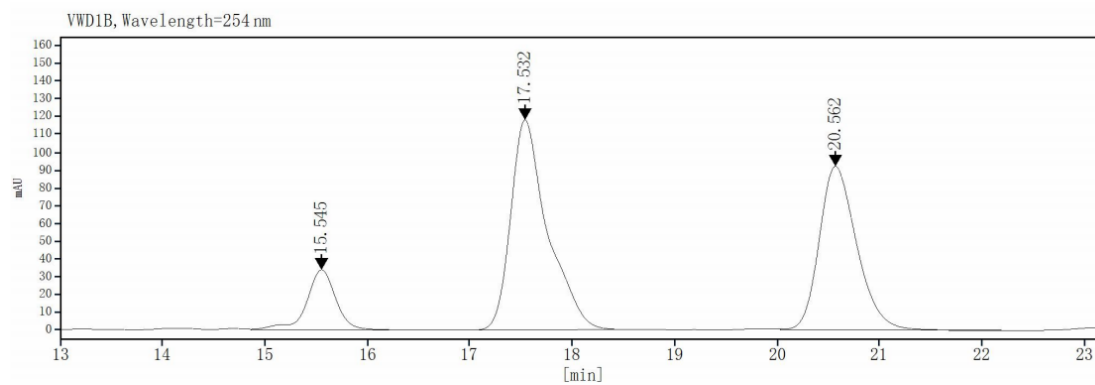

VWD1B, Wavelength=254 nm

| Ret.Time | Area    | Height | Area%  |
|----------|---------|--------|--------|
| 15.545   | 681.94  | 33.98  | 11.36  |
| 17.532   | 2960.98 | 118.43 | 49.34  |
| 20.562   | 2358.03 | 92.38  | 39.29  |
| Total    | 6000.96 | 244.79 | 100.00 |

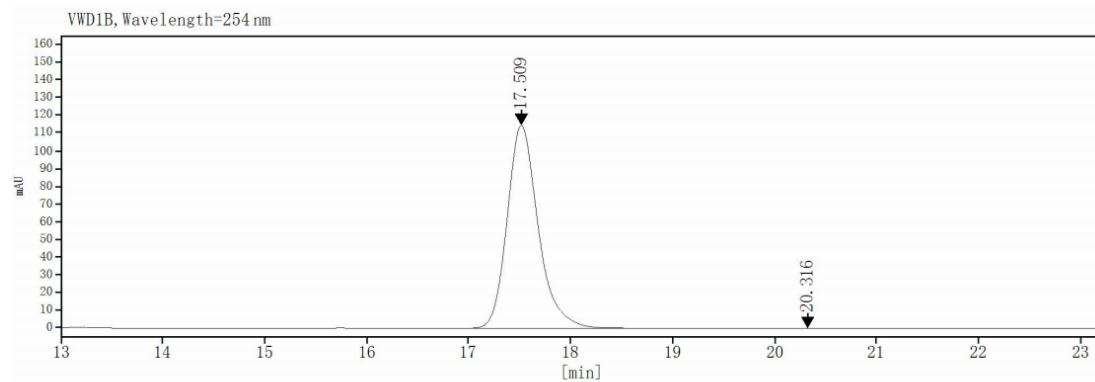

VWD1B, Wavelength=254 nm

| Ret.Time | Area    | Height | Area%  |
|----------|---------|--------|--------|
| 17.509   | 2426.51 | 114.87 | 99.99  |
| 20.316   | 0.26    | 0.01   | 0.01   |
| Total    | 2426.77 | 114.89 | 100.00 |

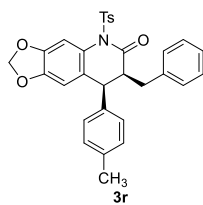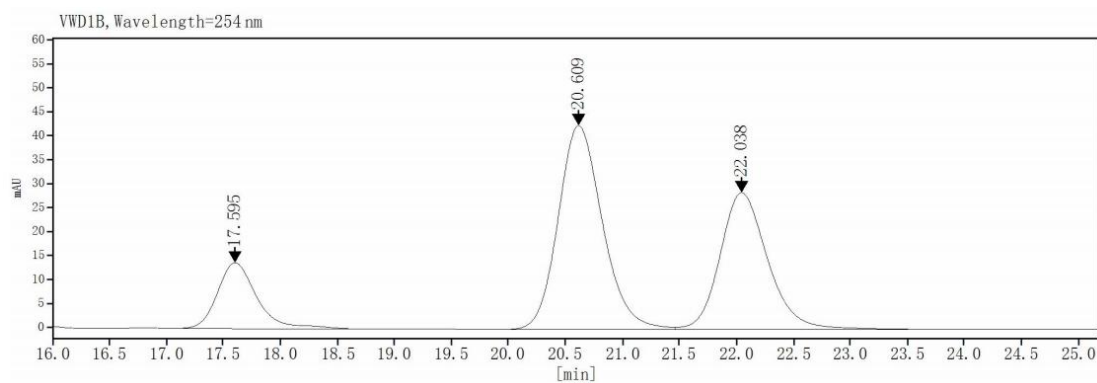

VWD1B, Wavelength=254 nm

| Ret.Time | Area    | Height | Area%  |
|----------|---------|--------|--------|
| 17.595   | 331.13  | 13.77  | 14.34  |
| 20.609   | 1148.57 | 42.59  | 49.73  |
| 22.038   | 829.82  | 28.57  | 35.93  |
| Total    | 2309.52 | 84.93  | 100.00 |

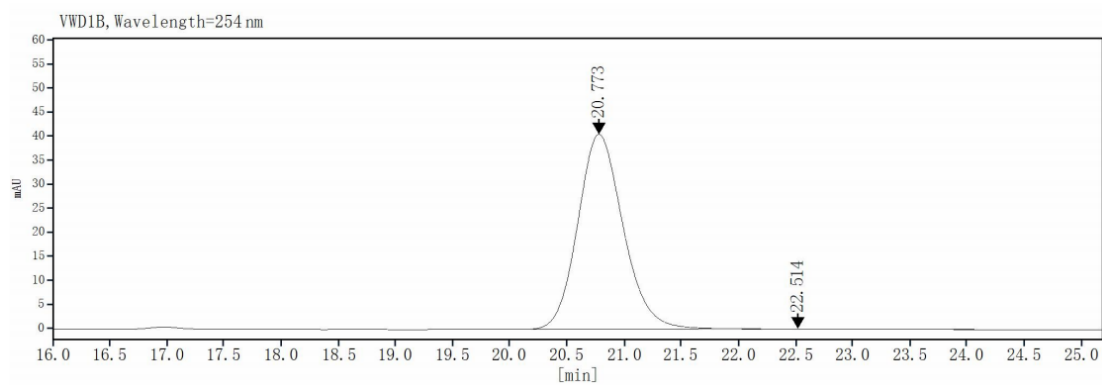

VWD1B, Wavelength=254 nm

| Ret.Time | Area    | Height | Area%  |
|----------|---------|--------|--------|
| 20.773   | 1118.45 | 40.59  | 99.62  |
| 22.514   | 4.32    | 0.07   | 0.38   |
| Total    | 1122.77 | 40.66  | 100.00 |

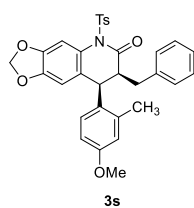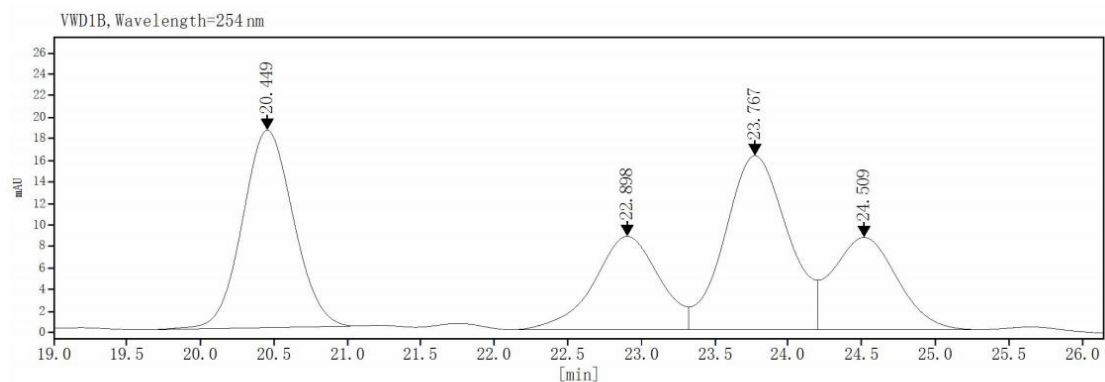

VWD1B, Wavelength=254 nm

| Ret.Time | Area    | Height | Area%  |
|----------|---------|--------|--------|
| 20.449   | 442.31  | 18.34  | 30.43  |
| 22.898   | 267.79  | 8.67   | 18.42  |
| 23.767   | 482.47  | 16.16  | 33.19  |
| 24.509   | 260.90  | 8.57   | 17.95  |
| Total    | 1453.46 | 51.74  | 100.00 |

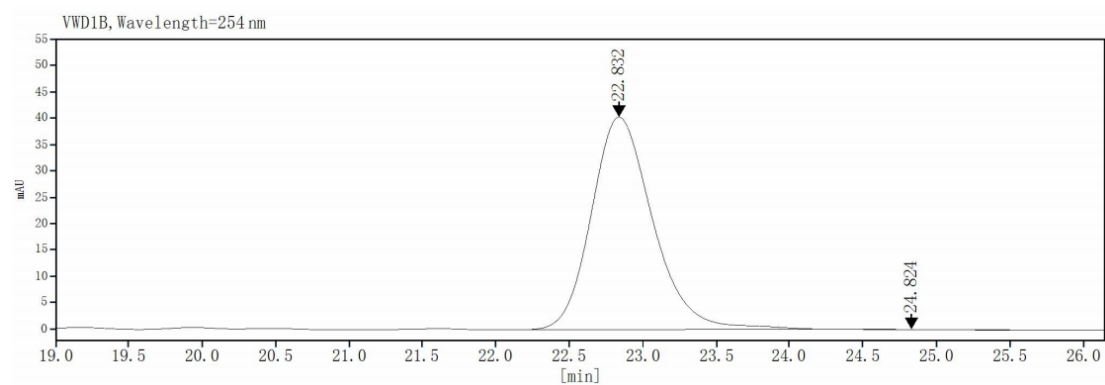

VWD1B, Wavelength=254 nm

| Ret.Time | Area    | Height | Area%  |
|----------|---------|--------|--------|
| 22.832   | 1170.68 | 40.29  | 99.76  |
| 24.824   | 2.86    | 0.05   | 0.24   |
| Total    | 1173.54 | 40.35  | 100.00 |

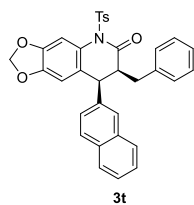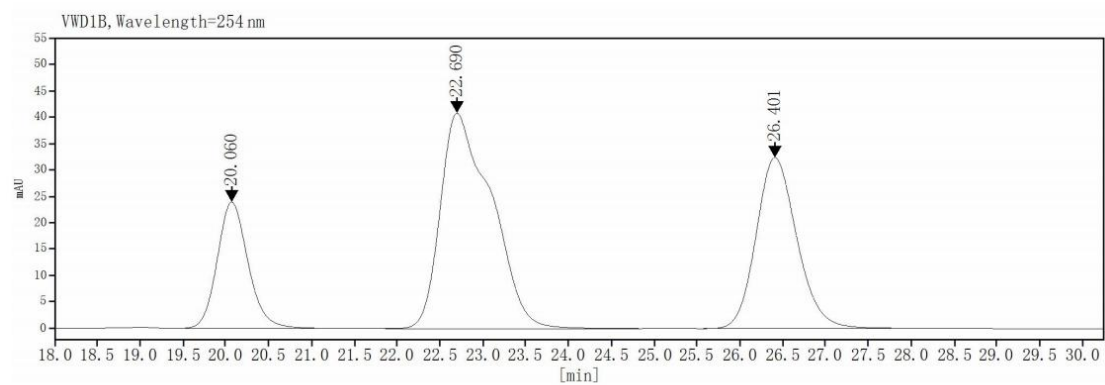

VWD1B, Wavelength=254 nm

| Ret.Time | Area    | Height | Area%  |
|----------|---------|--------|--------|
| 20.060   | 601.84  | 23.98  | 17.85  |
| 22.690   | 1694.13 | 40.85  | 50.24  |
| 26.401   | 1076.38 | 32.42  | 31.92  |
| Total    | 3372.35 | 97.25  | 100.00 |

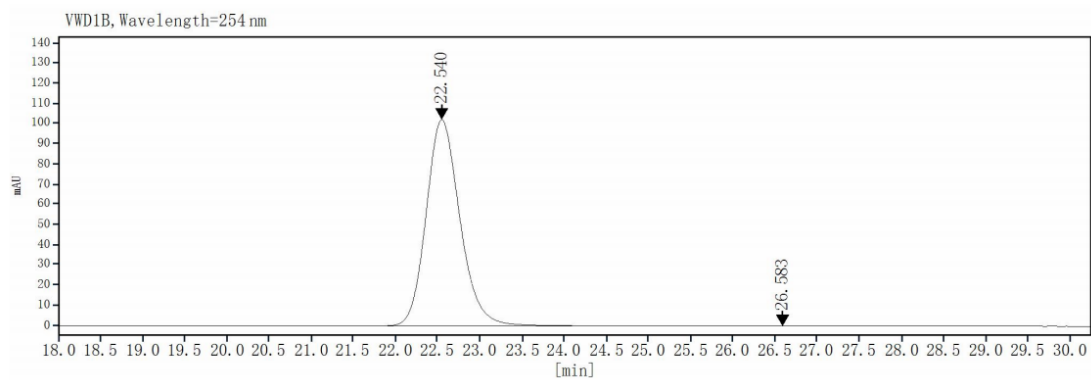

VWD1B, Wavelength=254 nm

| Ret.Time | Area    | Height | Area%  |
|----------|---------|--------|--------|
| 22.540   | 2861.55 | 102.37 | 99.97  |
| 26.583   | 0.92    | 0.02   | 0.03   |
| Total    | 2862.47 | 102.39 | 100.00 |

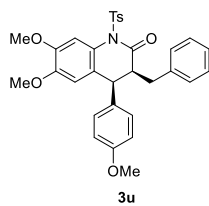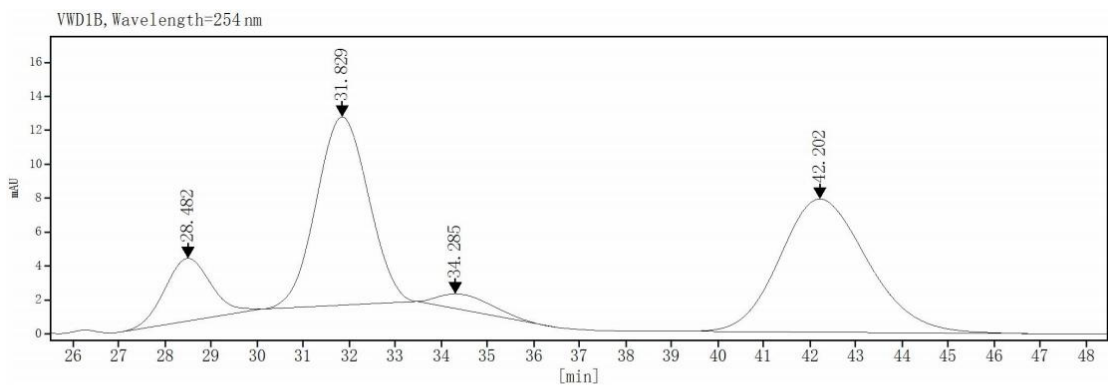

VWD1B, Wavelength=254 nm

| Ret.Time | Area    | Height | Area%  |
|----------|---------|--------|--------|
| 28.482   | 256.27  | 3.69   | 11.40  |
| 31.829   | 873.20  | 11.10  | 38.85  |
| 34.285   | 73.83   | 0.86   | 3.28   |
| 42.202   | 1044.57 | 7.85   | 46.47  |
| Total    | 2247.88 | 23.50  | 100.00 |

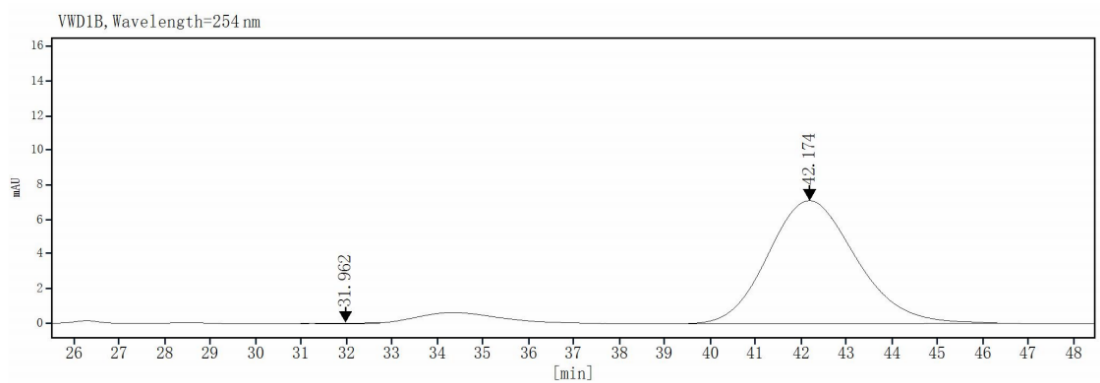

VWD1B, Wavelength=254 nm

| Ret.Time | Area   | Height | Area%  |
|----------|--------|--------|--------|
| 31.962   | 2.26   | 0.03   | 0.23   |
| 42.174   | 962.76 | 7.12   | 99.77  |
| Total    | 965.03 | 7.16   | 100.00 |

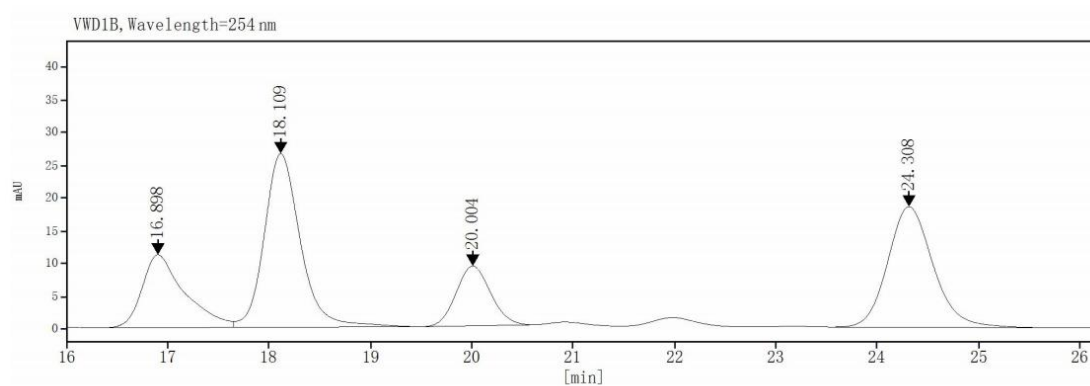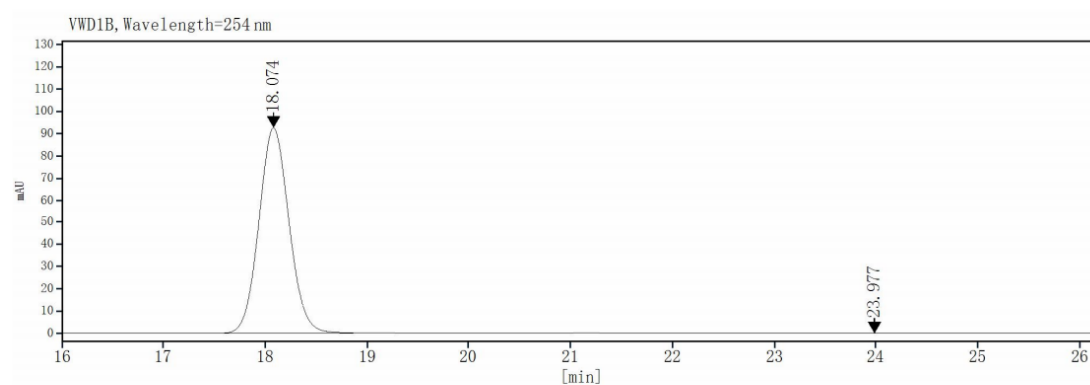

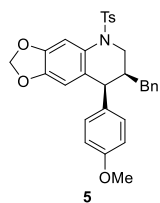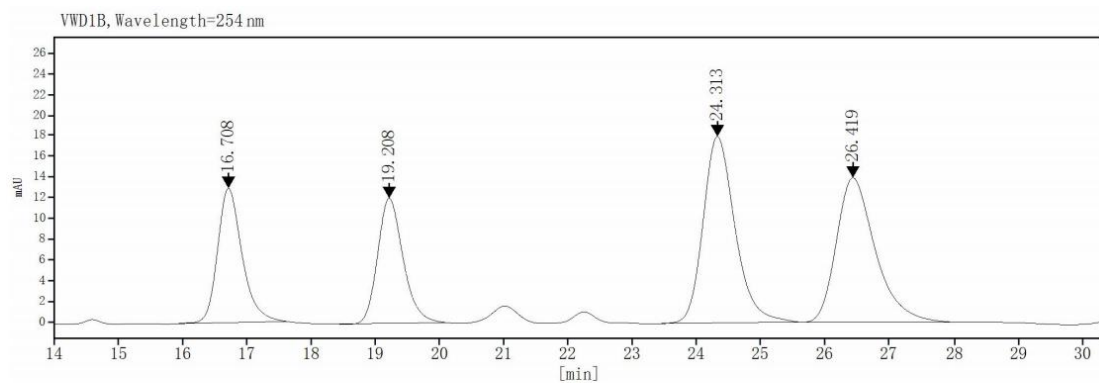

VWD1B, Wavelength=254 nm

| Ret.Time | Area    | Height | Area%  |
|----------|---------|--------|--------|
| 16.708   | 344.58  | 13.00  | 18.28  |
| 19.208   | 331.82  | 12.10  | 17.61  |
| 24.313   | 621.51  | 18.03  | 32.98  |
| 26.419   | 586.68  | 13.96  | 31.13  |
| Total    | 1884.59 | 57.08  | 100.00 |

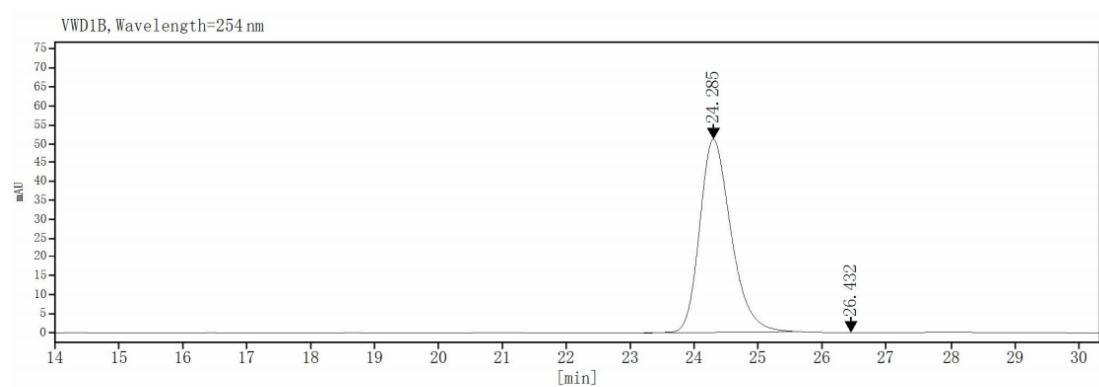

VWD1B, Wavelength=254 nm

| Ret.Time | Area    | Height | Area%  |
|----------|---------|--------|--------|
| 24.285   | 1743.29 | 51.17  | 99.98  |
| 26.432   | 0.43    | 0.02   | 0.02   |
| Total    | 1743.72 | 51.19  | 100.00 |
